# Supplementary material for: Functionally Enigmatic Genes: A Case Study of the Brain Ignorome
Source: PLoS One. 2014 Feb 11;9(2):e88889. doi: 10.1371/journal.pone.0088889 (PMC3921226; doi:10.1371/journal.pone.0088889)
Supplement: Table S2 — (XLS) [file pone.0088889.s003.xls]

## Sheet: Table S1
	Table S2 : Genes with intense and selective expression (ISE) identified using Affymetrix Mouse M430 v2 GeneChip array
	Data from: Lommel LV, Thorrez L, Lemaire K, Schuit F (GSE 9954)
	Citation: Using ribosomal protein genes as reference: a tale of caution. PLoS One 2008 Mar 26;3(3):e1854. PMID: 18365009
	Probe sets (n = 406) have been selected to have a Brain-to-Non-Brain expression ratio of >8X and expression value of > 8
	Annotation: Annotation file from Affymetrix and Genenetwork.org. RNA-seq expression data from http://ucscgenomebrowser.genenetwork.org used to clarify transcript models.
	Processed By: Ashutosh K. Pandey
	Last edited: 03/29/2013
	Link: http://www.ncbi.nlm.nih.gov/projects/geo/query/acc.cgi?acc=GSE9954
Index	Probe ID	Mouse GeneID	Gene Symbol	Gene Description	N of tissues with expression similar to brain	log(Ratio of Brain/Avg. of 22 other non-Brain tissues)	GeneID (Human)	Gene Symbol (Human)	MGI and Ensembl GeneIDs	Chromosome (Mouse)	Gene-type
1	1416828_at	20614	Snap25	synaptosomal-associated protein 25	2	7.2864	6616	SNAP25	MGI:98331|Ensembl:ENSMUSG00000027273|Vega:OTTMUSG00000015556	2	protein-coding
2	1436889_at	14394	Gabra1	gamma-aminobutyric acid (GABA) A receptor, subunit alpha 1	1	6.98429	2554	GABRA1	MGI:95613|Ensembl:ENSMUSG00000010803|Vega:OTTMUSG00000005445	11	protein-coding
3	1433532_a_at	17196	Mbp	myelin basic protein	0	6.95978	4155	MBP	MGI:96925|Ensembl:ENSMUSG00000041607|Vega:OTTMUSG00000016316	18	protein-coding
4	1438194_at	20511	Slc1a2	solute carrier family 1 (glial high affinity glutamate transporter), member 2	0	6.86157	6506	SLC1A2	MGI:101931|Ensembl:ENSMUSG00000005089|Vega:OTTMUSG00000014848	2	protein-coding
5	1420955_at	26950	Vsnl1	visinin-like 1	2	6.71767	7447	VSNL1	MGI:1349453|Ensembl:ENSMUSG00000054459	12	protein-coding
6	1434670_at	16572	Kif5a	kinesin family member 5A	0	6.49147	3798	KIF5A	MGI:109564|Ensembl:ENSMUSG00000074657	10	protein-coding
7	1436066_at	545156	Kalrn	kalirin, RhoGEF kinase	0	6.36226	8997	KALRN	MGI:2685385|Ensembl:ENSMUSG00000061751|Vega:OTTMUSG00000017795	16	protein-coding
8	1435933_at	110876	Scn2a1	sodium channel, voltage-gated, type II, alpha 1	0	6.33313	6326	SCN2A	MGI:98248|Ensembl:ENSMUSG00000075318|Vega:OTTMUSG00000012963	2	protein-coding
9	1416561_at	14415	Gad1	glutamic acid decarboxylase 1	1	6.33184	2571	GAD1	MGI:95632|Ensembl:ENSMUSG00000070880|Vega:OTTMUSG00000033269	2	protein-coding
10	1433987_at	170638	Hpcal4	hippocalcin-like 4	0	6.31818	51440	HPCAL4	MGI:2157521|Ensembl:ENSMUSG00000046093|Vega:OTTMUSG00000008935	4	protein-coding
11	1434146_at	14800	Gria2	glutamate receptor, ionotropic, AMPA2 (alpha 2)	0	6.31536	2891	GRIA2	MGI:95809|Ensembl:ENSMUSG00000033981	3	protein-coding
12	1456741_s_at	234267	Gpm6a	glycoprotein m6a	5	6.27697	2823	GPM6A	MGI:107671|Ensembl:ENSMUSG00000031517	8	protein-coding
13	1436268_at	13199	Ddn	dendrin	0	6.2754	23109	DDN	MGI:108101|Ensembl:ENSMUSG00000059213	15	protein-coding
14	1451718_at	18823	Plp1	proteolipid protein (myelin) 1	0	6.18784	5354	PLP1	MGI:97623|Ensembl:ENSMUSG00000031425|Vega:OTTMUSG00000016519	X	protein-coding
15	1433785_at	17433	Mobp	myelin-associated oligodendrocytic basic protein	0	6.15839	4336	MOBP	MGI:108511|Ensembl:ENSMUSG00000032517|Vega:OTTMUSG00000037099	9	protein-coding
16	1429685_at	14401	Gabrb2	gamma-aminobutyric acid (GABA) A receptor, subunit beta 2	0	6.08782	2561	GABRB2	MGI:95620|Ensembl:ENSMUSG00000007653|Vega:OTTMUSG00000006331	11	protein-coding
17	1454672_at	18039	Nefl	neurofilament, light polypeptide	2	6.06987	4747	NEFL	MGI:97313|Ensembl:ENSMUSG00000022055|Vega:OTTMUSG00000016377	14	protein-coding
18	1417672_at	94229	Slc4a10	solute carrier family 4, sodium bicarbonate cotransporter-like, member 10	1	6.04536	57282	SLC4A10	MGI:2150150|Ensembl:ENSMUSG00000026904|Vega:OTTMUSG00000012738	2	protein-coding
19	1439048_at	239857	Cadm2	cell adhesion molecule 2	1	5.98309	253559	CADM2	MGI:2442722|Ensembl:ENSMUSG00000064115|Vega:OTTMUSG00000017090	16	protein-coding
20	1454691_at	18189	Nrxn1	neurexin I	2	5.85264	9378	NRXN1	MGI:1096391|Ensembl:ENSMUSG00000024109|Vega:OTTMUSG00000034567	17	protein-coding
21	1423860_at	19215	Ptgds	prostaglandin D2 synthase (brain)	3	5.84082	5730	PTGDS	MGI:99261|Ensembl:ENSMUSG00000015090|Vega:OTTMUSG00000012118	2	protein-coding
22	1437195_x_at	26414	Mapk10	mitogen-activated protein kinase 10	3	5.81711	5602	MAPK10	MGI:1346863|Ensembl:ENSMUSG00000046709|Vega:OTTMUSG00000016343	5	protein-coding
23	1426562_a_at	56177	Olfm1	olfactomedin 1	1	5.72921	10439	OLFM1	MGI:1860437|Ensembl:ENSMUSG00000026833|Vega:OTTMUSG00000011625	2	protein-coding
24	1418829_a_at	13807	Eno2	enolase 2, gamma neuronal	2	5.69751	2026	ENO2	MGI:95394|Ensembl:ENSMUSG00000004267|Vega:OTTMUSG00000022240	6	protein-coding
25	1434877_at	18164	Nptx1	neuronal pentraxin 1	1	5.66987	4884	NPTX1	MGI:107811|Ensembl:ENSMUSG00000025582|Vega:OTTMUSG00000003985	11	protein-coding
26	1427247_at	229791	D3Bwg0562e	DNA segment, Chr 3, Brigham & Women's Genetics 0562 expressed	0	5.65401	9890	LPPR4	MGI:106530|Ensembl:ENSMUSG00000044667|Vega:OTTMUSG00000023917	3	protein-coding
27	1419473_a_at	12424	Cck	cholecystokinin	1	5.6511	885	CCK	MGI:88297|Ensembl:ENSMUSG00000032532	9	protein-coding
28	1415885_at	12653	Chgb	chromogranin B	4	5.62814	1114	CHGB	MGI:88395|Ensembl:ENSMUSG00000027350|Vega:OTTMUSG00000015662	2	protein-coding
29	1433583_at	216049	Zfp365	zinc finger protein 365	1	5.62658	22891	ZNF365	MGI:2143676|Ensembl:ENSMUSG00000037855|Vega:OTTMUSG00000027948	10	protein-coding
30	1420545_a_at	108699	Chn1	chimerin (chimaerin) 1	2	5.59916	1123	CHN1	MGI:1915674|Ensembl:ENSMUSG00000056486|Vega:OTTMUSG00000013428	2	protein-coding
31	1422520_at	18040	Nefm	neurofilament, medium polypeptide	2	5.56397	4741	NEFM	MGI:97314|Ensembl:ENSMUSG00000022054|Vega:OTTMUSG00000016378	14	protein-coding
32	1418588_at	22360	Nrsn1	neurensin 1	2	5.55658	140767	NRSN1	MGI:894662|Ensembl:ENSMUSG00000048978|Vega:OTTMUSG00000000740	13	protein-coding
33	1421990_at	20979	Syt1	synaptotagmin I	2	5.54486	6857	SYT1	MGI:99667|Ensembl:ENSMUSG00000035864|Vega:OTTMUSG00000016266	10	protein-coding
34	1458622_at	18212	Ntrk2	neurotrophic tyrosine kinase, receptor, type 2	0	5.54259	4915	NTRK2	MGI:97384|Ensembl:ENSMUSG00000055254	13	protein-coding
35	1421349_x_at	57754	Cend1	cell cycle exit and neuronal differentiation 1	1	5.54028	51286	CEND1	MGI:1929898|Ensembl:ENSMUSG00000060240|Vega:OTTMUSG00000034077	7	protein-coding
36	1450930_at	15444	Hpca	hippocalcin	0	5.50807	3208	HPCA	MGI:1336200|Ensembl:ENSMUSG00000028785|Vega:OTTMUSG00000009624	4	protein-coding
37	1452142_at	232333	Slc6a1	solute carrier family 6 (neurotransmitter transporter, GABA), member 1	1	5.50525	6529	SLC6A1	MGI:95627|Ensembl:ENSMUSG00000030310	6	protein-coding
38	1452240_at	108013	Celf4	CUGBP, Elav-like family member 4	3	5.50439	56853	CELF4	MGI:1932407|Ensembl:ENSMUSG00000024268	18	protein-coding
39	1449563_at	12805	Cntn1	contactin 1	3	5.497	1272	CNTN1	MGI:105980|Ensembl:ENSMUSG00000055022|Vega:OTTMUSG00000014988	15	protein-coding
40	1456487_at	432530	Adcy1	adenylate cyclase 1	1	5.49371	107	ADCY1	MGI:99677|Ensembl:ENSMUSG00000020431|Vega:OTTMUSG00000005134	11	protein-coding
41	1436329_at	13655	Egr3	early growth response 3	1	5.48422	1960	EGR3	MGI:1306780|Ensembl:ENSMUSG00000033730	14	protein-coding
42	1447992_s_at	18549	Pcsk2	proprotein convertase subtilisin/kexin type 2	1	5.46255	5126	PCSK2	MGI:97512|Ensembl:ENSMUSG00000027419|Vega:OTTMUSG00000003089	2	protein-coding
43	1448972_at	14799	Gria1	glutamate receptor, ionotropic, AMPA1 (alpha 1)	0	5.42668	2890	GRIA1	MGI:95808|Ensembl:ENSMUSG00000020524|Vega:OTTMUSG00000005703	11	protein-coding
44	1434202_a_at	268709	Fam107a	family with sequence similarity 107, member A	3	5.41774	11170	FAM107A	MGI:3041256|Ensembl:ENSMUSG00000021750|Vega:OTTMUSG00000027765	14	protein-coding
45	1451674_at	57138	Slc12a5	solute carrier family 12, member 5	1	5.38016	57468	SLC12A5	MGI:1862037|Ensembl:ENSMUSG00000017740|Vega:OTTMUSG00000019699	2	protein-coding
46	1436076_at	224997	Dlgap1	discs, large (Drosophila) homolog-associated protein 1	1	5.37318	9229	DLGAP1	MGI:1346065|Ensembl:ENSMUSG00000003279|Vega:OTTMUSG00000033115	17	protein-coding
47	1434325_x_at	19085	Prkar1b	protein kinase, cAMP dependent regulatory, type I beta	3	5.3596	5575	PRKAR1B	MGI:97759|Ensembl:ENSMUSG00000025855|Vega:OTTMUSG00000025121	5	protein-coding
48	1437855_at	17758	Mtap4	microtubule-associated protein 4	2	5.34861	4134	MAP4	MGI:97178|Ensembl:ENSMUSG00000032479|Vega:OTTMUSG00000035845	9	protein-coding
49	1451620_at	227580	C1ql3	C1q-like 3	1	5.33993	389941	C1QL3	MGI:2387350|Ensembl:ENSMUSG00000049630|Vega:OTTMUSG00000011228	2	protein-coding
50	1418357_at	15228	Foxg1	forkhead box G1	1	5.32739	2290	FOXG1	MGI:1347464|Ensembl:ENSMUSG00000020950|Vega:OTTMUSG00000021132	12	protein-coding
51	1422504_at	14658	Glrb	glycine receptor, beta subunit	3	5.31975	2743	GLRB	MGI:95751|Ensembl:ENSMUSG00000028020|Vega:OTTMUSG00000024419	3	protein-coding
52	1436450_at	52897	Rbfox3	RNA binding protein, fox-1 homolog (C. elegans) 3	1	5.29073	146713	RBFOX3	MGI:106368|Ensembl:ENSMUSG00000025576|Vega:OTTMUSG00000003975	11	protein-coding
53	1450863_a_at	13175	Dclk1	doublecortin-like kinase 1	2	5.28997	9201	DCLK1	MGI:1330861|Ensembl:ENSMUSG00000027797	3	protein-coding
54	1434194_at	17756	Mtap2	microtubule-associated protein 2	3	5.28395	6622	SNCA	MGI:97175|Ensembl:ENSMUSG00000015222|Vega:OTTMUSG00000016448	1	protein-coding
55	1436188_a_at	234593	Ndrg4	N-myc downstream regulated gene 4	3	5.26976	65009	NDRG4	MGI:2384590|Ensembl:ENSMUSG00000036564|Vega:OTTMUSG00000027408	8	protein-coding
56	1417799_at	66237	Atp6v1g2	ATPase, H+ transporting, lysosomal V1 subunit G2	1	5.26239	534	ATP6V1G2	MGI:1913487|Ensembl:ENSMUSG00000024403|Vega:OTTMUSG00000031451	17	protein-coding
57	1423515_at	20273	Scn8a	sodium channel, voltage-gated, type VIII, alpha	2	5.25817	6334	SCN8A	MGI:103169|Ensembl:ENSMUSG00000023033	15	protein-coding
58	1423853_at	76161	6330527O06Rik	RIKEN cDNA 6330527O06 gene	1	5.24002	24141	LAMP5	MGI:1923411|Ensembl:ENSMUSG00000027270|Vega:OTTMUSG00000015982	2	protein-coding
59	1418047_at	11922	Neurod6	neurogenic differentiation 6	1	5.23287	63974	NEUROD6	MGI:106593|Ensembl:ENSMUSG00000037984	6	protein-coding
60	1457446_at	330908	Opcml	opioid binding protein/cell adhesion molecule-like	0	5.22958	4978	OPCML	MGI:97397|Ensembl:ENSMUSG00000062257|Vega:OTTMUSG00000024277	9	protein-coding
61	1457743_at	52882	Rgs7bp	regulator of G-protein signalling 7 binding protein	1	5.2243	401190	RGS7BP	MGI:106334|Ensembl:ENSMUSG00000021719	13	protein-coding
62	1440270_at	14167	Fgf12	fibroblast growth factor 12	1	5.21866	2257	FGF12	MGI:109183|Ensembl:ENSMUSG00000022523	16	protein-coding
63	1435113_x_at	20262	Stmn3	stathmin-like 3	3	5.19569	50861	STMN3	MGI:1277137|Ensembl:ENSMUSG00000027581|Vega:OTTMUSG00000016652	2	protein-coding
64	1424248_at	74100	Arpp21	cyclic AMP-regulated phosphoprotein, 21	1	5.17731	10777	ARPP21	MGI:107562|Ensembl:ENSMUSG00000032503|Vega:OTTMUSG00000034741	9	protein-coding
65	1417504_at	12307	Calb1	calbindin 1	4	5.17109	793	CALB1	MGI:88248|Ensembl:ENSMUSG00000028222|Vega:OTTMUSG00000004637	4	protein-coding
66	1455272_at	108071	Grm5	glutamate receptor, metabotropic 5	1	5.14754	2915	GRM5	MGI:1351342|Ensembl:ENSMUSG00000049583|Vega:OTTMUSG00000016489	7	protein-coding
67	1439833_at	24050	Sept3	septin 3	2	5.13232	55964	SEPT3	MGI:1345148|Ensembl:ENSMUSG00000022456	15	protein-coding
68	1448955_s_at	27062	Cadps	Ca2+-dependent secretion activator	3	5.11977	8618	CADPS	MGI:1350922|Ensembl:ENSMUSG00000054423	14	protein-coding
69	1418046_at	17954	Nap1l2	nucleosome assembly protein 1-like 2	3	5.11444	4674	NAP1L2	MGI:106654|Ensembl:ENSMUSG00000082229|Vega:OTTMUSG00000018175	X	protein-coding
70	1460449_at	77531	Anks1b	ankyrin repeat and sterile alpha motif domain containing 1B	2	5.11147	56899	ANKS1B	MGI:1924781|Ensembl:ENSMUSG00000058589	10	protein-coding
71	1458662_at	208846	Daam1	dishevelled associated activator of morphogenesis 1	0	5.09776	23002	DAAM1	MGI:1914596|Ensembl:ENSMUSG00000034574	12	protein-coding
72	1422600_at	19417	Rasgrf1	RAS protein-specific guanine nucleotide-releasing factor 1	1	5.09667	5923	RASGRF1	MGI:99694|Ensembl:ENSMUSG00000032356	9	protein-coding
73	1423231_at	64011	Nrgn	neurogranin	0	5.08172	4900	NRGN	MGI:1927184|Ensembl:ENSMUSG00000053310	9	protein-coding
74	1434172_at	12801	Cnr1	cannabinoid receptor 1 (brain)	2	5.07173	1268	CNR1	MGI:104615|Ensembl:ENSMUSG00000044288|Vega:OTTMUSG00000008304	4	protein-coding
75	1434800_at	64176	Sv2b	synaptic vesicle glycoprotein 2 b	2	5.06746	9899	SV2B	MGI:1927338|Ensembl:ENSMUSG00000053025	7	protein-coding
76	1455785_at	16485	Kcna1	potassium voltage-gated channel, shaker-related subfamily, member 1	1	5.05698	3736	KCNA1	MGI:96654|Ensembl:ENSMUSG00000047976	6	protein-coding
77	1437640_at	230235	Frrs1l	ferric-chelate reductase 1 like	0	5.03791	23732	FRRS1L	MGI:2442704|Ensembl:ENSMUSG00000045589|Vega:OTTMUSG00000007318	4	protein-coding
78	1423173_at	17957	Napb	N-ethylmaleimide sensitive fusion protein attachment protein beta	1	5.01129	63908	NAPB	MGI:104562|Ensembl:ENSMUSG00000027438|Vega:OTTMUSG00000015716	2	protein-coding
79	1435021_at	14402	Gabrb3	gamma-aminobutyric acid (GABA) A receptor, subunit beta 3	4	5.01041	2562	GABRB3	MGI:95621|Ensembl:ENSMUSG00000033676|Vega:OTTMUSG00000031173	7	protein-coding
80	1455266_at	16574	Kif5c	kinesin family member 5C	3	5.00267	3800	KIF5C	MGI:1098269|Ensembl:ENSMUSG00000026764|Vega:OTTMUSG00000012481	2	protein-coding
81	1423183_at	56839	Lgi1	leucine-rich repeat LGI family, member 1	0	4.99158	9211	LGI1	MGI:1861691|Ensembl:ENSMUSG00000067242|Vega:OTTMUSG00000016342	19	protein-coding
82	1435957_at	110862	Kcnq3	potassium voltage-gated channel, subfamily Q, member 3	0	4.97708	3786	KCNQ3	MGI:1336181|Ensembl:ENSMUSG00000056258	15	protein-coding
83	1423537_at	14432	Gap43	growth associated protein 43	2	4.97361	2596	GAP43	MGI:95639|Ensembl:ENSMUSG00000047261|Vega:OTTMUSG00000016275	16	protein-coding
84	1435038_s_at	269774	Aak1	AP2 associated kinase 1	2	4.95941	22848	AAK1	MGI:1098687|Ensembl:ENSMUSG00000057230|Vega:OTTMUSG00000024486	6	protein-coding
85	1430136_at	108069	Grm3	glutamate receptor, metabotropic 3	1	4.95776	2913	GRM3	MGI:1351340|Ensembl:ENSMUSG00000003974	5	protein-coding
86	1435047_at	67295	Rab3c	RAB3C, member RAS oncogene family	4	4.93661	115827	RAB3C	MGI:1914545|Ensembl:ENSMUSG00000021700	13	protein-coding
87	1448443_at	20713	Serpini1	serine (or cysteine) peptidase inhibitor, clade I, member 1	3	4.93384	5274	SERPINI1	MGI:1194506|Ensembl:ENSMUSG00000027834|Vega:OTTMUSG00000021878	3	protein-coding
88	1416149_at	50914	Olig1	oligodendrocyte transcription factor 1	1	4.93288	116448	OLIG1	MGI:1355334|Ensembl:ENSMUSG00000046160|Vega:OTTMUSG00000019872	16	protein-coding
89	1423150_at	20394	Scg5	secretogranin V	3	4.93239	6447	SCG5	MGI:98289|Ensembl:ENSMUSG00000023236|Vega:OTTMUSG00000019161	2	protein-coding
90	1433788_at	18191	Nrxn3	neurexin III	1	4.93025	9369	NRXN3	MGI:1096389|Ensembl:ENSMUSG00000066392|Vega:OTTMUSG00000035299	12	protein-coding
91	1436483_at	17933	Myt1l	myelin transcription factor 1-like	3	4.93	23040	MYT1L	MGI:1100511|Ensembl:ENSMUSG00000061911	12	protein-coding
92	1428184_at	76982	3110035E14Rik	RIKEN cDNA 3110035E14 gene	0	4.9257	254778	C8orf46	MGI:1924232|Ensembl:ENSMUSG00000067879|Vega:OTTMUSG00000022603	1	protein-coding
93	1448991_a_at	226180	Ina	internexin neuronal intermediate filament protein, alpha	4	4.91666	9118	INA	MGI:96568|Ensembl:ENSMUSG00000034336|Vega:OTTMUSG00000016340	19	protein-coding
94	1450121_at	20265	Scn1a	sodium channel, voltage-gated, type I, alpha	1	4.91508	6323	SCN1A	MGI:98246|Ensembl:ENSMUSG00000064329|Vega:OTTMUSG00000013102	2	protein-coding
95	1456379_x_at	227325	Dner	delta/notch-like EGF-related receptor	3	4.90531	92737	DNER	MGI:2152889|Ensembl:ENSMUSG00000036766	1	protein-coding
96	1434249_s_at	94090	Trim9	tripartite motif-containing 9	1	4.90487	114088	TRIM9	MGI:2137354|Ensembl:ENSMUSG00000021071	12	protein-coding
97	1427481_a_at	232975	Atp1a3	ATPase, Na+/K+ transporting, alpha 3 polypeptide	1	4.90201	478	ATP1A3	MGI:88107|Ensembl:ENSMUSG00000040907|Vega:OTTMUSG00000016491	7	protein-coding
98	1417005_at	16593	Klc1	kinesin light chain 1	2	4.84302	3831	KLC1	MGI:107978|Ensembl:ENSMUSG00000021288|Vega:OTTMUSG00000027507	12	protein-coding
99	1434969_at	319586	Celf5	CUGBP, Elav-like family member 5	2	4.84055	60680	CELF5	MGI:2442333|Ensembl:ENSMUSG00000034818|Vega:OTTMUSG00000030422	10	protein-coding
100	1433888_at	11941	Atp2b2	ATPase, Ca++ transporting, plasma membrane 2	1	4.84051	491	ATP2B2	MGI:105368|Ensembl:ENSMUSG00000030302|Vega:OTTMUSG00000018967	6	protein-coding
101	1419392_at	26875	Pclo	piccolo (presynaptic cytomatrix protein)	2	4.84017	27445	PCLO	MGI:1349390|Ensembl:ENSMUSG00000061601	5	protein-coding
102	1436912_at	12298	Cacnb4	calcium channel, voltage-dependent, beta 4 subunit	2	4.83321	785	CACNB4	MGI:103301|Ensembl:ENSMUSG00000017412|Vega:OTTMUSG00000012607	2	protein-coding
103	1415844_at	20983	Syt4	synaptotagmin IV	4	4.82813	6860	SYT4	MGI:101759|Ensembl:ENSMUSG00000024261	18	protein-coding
104	1435308_at	14348	Fut9	fucosyltransferase 9	2	4.82172	10690	FUT9	MGI:1330859|Ensembl:ENSMUSG00000055373|Vega:OTTMUSG00000004810	4	protein-coding
105	1421882_a_at	15569	Elavl2	ELAV (embryonic lethal, abnormal vision, Drosophila)-like 2 (Hu antigen B)	5	4.81119	1993	ELAVL2	MGI:1100887|Ensembl:ENSMUSG00000008489|Vega:OTTMUSG00000007821	4	protein-coding
106	1427044_a_at	218038	Amph	amphiphysin	2	4.80213	273	AMPH	MGI:103574|Ensembl:ENSMUSG00000021314	13	protein-coding
107	1448832_a_at	12889	Cplx1	complexin 1	1	4.79679	10815	CPLX1	MGI:104727|Ensembl:ENSMUSG00000033615|Vega:OTTMUSG00000028893	5	protein-coding
108	1424547_at	72605	Car10	carbonic anhydrase 10	2	4.78049	56934	CA10	MGI:1919855|Ensembl:ENSMUSG00000056158|Vega:OTTMUSG00000001341	11	protein-coding
109	1416688_at	20616	Snap91	synaptosomal-associated protein 91	5	4.76788	9892	SNAP91	MGI:109132|Ensembl:ENSMUSG00000033419	9	protein-coding
110	1429225_at	76376	Slc24a2	solute carrier family 24 (sodium/potassium/calcium exchanger), member 2	2	4.75238	25769	SLC24A2	MGI:1923626|Ensembl:ENSMUSG00000037996|Vega:OTTMUSG00000007637	4	protein-coding
111	1438671_at	269643	Ppp2r2c	protein phosphatase 2 (formerly 2A), regulatory subunit B (PR 52), gamma isoform	2	4.74719	5522	PPP2R2C	MGI:2442660|Ensembl:ENSMUSG00000029120|Vega:OTTMUSG00000022772	5	protein-coding
112	1434582_at	238988	Erc2	ELKS/RAB6-interacting/CAST family member 2	4	4.73402	26059	ERC2	MGI:1098749|Ensembl:ENSMUSG00000040640	14	protein-coding
113	1434728_at	53623	Gria3	glutamate receptor, ionotropic, AMPA3 (alpha 3)	1	4.7253	2892	GRIA3	MGI:95810|Ensembl:ENSMUSG00000001986|Vega:OTTMUSG00000017323	X	protein-coding
114	1429761_at	104001	Rtn1	reticulon 1	3	4.72385	6252	RTN1	MGI:1933947|Ensembl:ENSMUSG00000021087|Vega:OTTMUSG00000016329	12	protein-coding
115	1417411_at	58243	Nap1l5	nucleosome assembly protein 1-like 5	5	4.72097	266812	NAP1L5	MGI:1923555|Ensembl:ENSMUSG00000055430	6	protein-coding
116	1456108_x_at	22671	Rnf112	ring finger protein 112	3	4.71519	7732	RNF112	MGI:106611|Ensembl:ENSMUSG00000010086|Vega:OTTMUSG00000005832	11	protein-coding
117	1416107_at	18197	Nsg2	neuron specific gene family member 2	5	4.70482	51617	HMP19	MGI:1202070|Ensembl:ENSMUSG00000020297|Vega:OTTMUSG00000005366	11	protein-coding
118	1423640_at	72003	Synpr	synaptoporin	3	4.69153	132204	SYNPR	MGI:1919253|Ensembl:ENSMUSG00000056296|Vega:OTTMUSG00000027769	14	protein-coding
119	1436246_at	20418	Shc3	src homology 2 domain-containing transforming protein C3	0	4.68896	53358	SHC3	MGI:106179|Ensembl:ENSMUSG00000021448	13	protein-coding
120	1452065_at	211739	Vstm2a	V-set and transmembrane domain containing 2A	3	4.66854	222008	VSTM2A	MGI:2384826|Ensembl:ENSMUSG00000048834|Vega:OTTMUSG00000005182	11	protein-coding
121	1456392_at	320840	Negr1	neuronal growth regulator 1	4	4.65969	257194	NEGR1	MGI:2444846|Ensembl:ENSMUSG00000040037|Vega:OTTMUSG00000024007	3	protein-coding
122	1437201_at	241568	Lrrc4c	leucine rich repeat containing 4C	2	4.65946	57689	LRRC4C	MGI:2442636|Ensembl:ENSMUSG00000050587|Vega:OTTMUSG00000014522	2	protein-coding
123	1434709_at	319504	Nrcam	neuron-glia-CAM-related cell adhesion molecule	4	4.65228	4897	NRCAM	MGI:104750|Ensembl:ENSMUSG00000020598	12	protein-coding
124	1428525_at	71691	Pnmal1	PNMA-like 1	4	4.65026	55228	PNMAL1	MGI:1918941|Ensembl:ENSMUSG00000041141	7	protein-coding
125	1435857_s_at	11803	Aplp1	amyloid beta (A4) precursor-like protein 1	3	4.64526	333	APLP1	MGI:88046|Ensembl:ENSMUSG00000006651	7	protein-coding
126	1460214_at	18546	Pcp4	Purkinje cell protein 4	3	4.64258	5121	PCP4	MGI:97509|Ensembl:ENSMUSG00000090223|Vega:OTTMUSG00000020445	16	protein-coding
127	1451461_a_at	11676	Aldoc	aldolase C, fructose-bisphosphate	3	4.64061	230	ALDOC	MGI:101863|Ensembl:ENSMUSG00000017390|Vega:OTTMUSG00000000108	11	protein-coding
128	1455374_at	16519	Kcnj3	potassium inwardly-rectifying channel, subfamily J, member 3	2	4.63663	3760	KCNJ3	MGI:104742|Ensembl:ENSMUSG00000026824|Vega:OTTMUSG00000015447	2	protein-coding
129	1460419_a_at	18751	Prkcb	protein kinase C, beta	4	4.6351	5579	PRKCB	MGI:97596|Ensembl:ENSMUSG00000052889|Vega:OTTMUSG00000016521	7	protein-coding
130	1460570_at	209966	Pgbd5	piggyBac transposable element derived 5	4	4.63074	79605	PGBD5	MGI:2429955|Ensembl:ENSMUSG00000050751|Vega:OTTMUSG00000027609	8	protein-coding
131	1455444_at	14395	Gabra2	gamma-aminobutyric acid (GABA) A receptor, subunit alpha 2	0	4.6281	2555	GABRA2	MGI:95614|Ensembl:ENSMUSG00000000560	5	protein-coding
132	1455358_at	268859	Rbfox1	RNA binding protein, fox-1 homolog (C. elegans) 1	5	4.62645	54715	RBFOX1	MGI:1926224|Ensembl:ENSMUSG00000008658	16	protein-coding
133	1434052_at	330941	AI593442	expressed sequence AI593442	2	4.60456	399947	C11orf87	MGI:2143099|Ensembl:ENSMUSG00000078307	9	protein-coding
134	1457979_at	244310	Dlgap2	discs, large (Drosophila) homolog-associated protein 2	0	4.59665	9228	DLGAP2	MGI:2443181|Ensembl:ENSMUSG00000047495|Vega:OTTMUSG00000034008	8	protein-coding
135	1441905_x_at	20646	Snrpn	small nuclear ribonucleoprotein N	2	4.59479	6638	SNRPN	MGI:98347|Ensembl:ENSMUSG00000000948	7	protein-coding
136	1436134_at	72821	Scn2b	sodium channel, voltage-gated, type II, beta	3	4.59286	6327	SCN2B	MGI:106921|Ensembl:ENSMUSG00000070304	9	protein-coding
137	1456387_at	319211	Nol4	nucleolar protein 4	3	4.59017	8715	NOL4	MGI:2441684|Ensembl:ENSMUSG00000041923|Vega:OTTMUSG00000035216	18	protein-coding
138	1426283_at	235106	Ntm	neurotrimin	2	4.58934	50863	NTM	MGI:2446259|Ensembl:ENSMUSG00000059974|Vega:OTTMUSG00000023155	9	protein-coding
139	1423281_at	20257	Stmn2	stathmin-like 2	5	4.58045	11075	STMN2	MGI:98241|Ensembl:ENSMUSG00000027500	3	protein-coding
140	1428460_at	20965	Syn2	synapsin II	1	4.57265	6854	SYN2	MGI:103020|Ensembl:ENSMUSG00000009394	6	protein-coding
141	1457311_at	12322	Camk2a	calcium/calmodulin-dependent protein kinase II alpha	2	4.56025	815	CAMK2A	MGI:88256|Ensembl:ENSMUSG00000024617|Vega:OTTMUSG00000016302	18	protein-coding
142	1435095_at	14400	Gabrb1	gamma-aminobutyric acid (GABA) A receptor, subunit beta 1	2	4.55795	2560	GABRB1	MGI:95619|Ensembl:ENSMUSG00000029212|Vega:OTTMUSG00000024372	5	protein-coding
143	1455225_at	64009	Syne1	synaptic nuclear envelope 1	0	4.55281	23345	SYNE1	MGI:1927152|Ensembl:ENSMUSG00000019769	10	protein-coding
144	1447771_at	243961	Shank1	SH3/ankyrin domain gene 1	1	4.55247	50944	SHANK1	MGI:3613677|Ensembl:ENSMUSG00000038738|Vega:OTTMUSG00000016443	7	protein-coding
145	1422625_at	23934	Ly6h	lymphocyte antigen 6 complex, locus H	2	4.54674	4062	LY6H	MGI:1346030|Ensembl:ENSMUSG00000022577|Vega:OTTMUSG00000033674	15	protein-coding
146	1417318_at	56710	Dbc1	deleted in bladder cancer 1 (human)	2	4.54622	1620	DBC1	MGI:1928478|Ensembl:ENSMUSG00000028351|Vega:OTTMUSG00000000310	4	protein-coding
147	1434083_a_at	270162	Elmod1	ELMO domain containing 1	3	4.54516	55531	ELMOD1	MGI:3583900|Ensembl:ENSMUSG00000041986	9	protein-coding
148	1429013_at	78283	Mtap7d2	MAP7 domain containing 2	4	4.53647	256714	MAP7D2	MGI:1917474|Ensembl:ENSMUSG00000041020|Vega:OTTMUSG00000019440	X	protein-coding
149	1451595_a_at	16536	Kcnq2	potassium voltage-gated channel, subfamily Q, member 2	1	4.53634	3785	KCNQ2	MGI:1309503|Ensembl:ENSMUSG00000016346|Vega:OTTMUSG00000016558	2	protein-coding
150	1455436_at	68203	Diras2	DIRAS family, GTP-binding RAS-like 2	5	4.53055	54769	DIRAS2	MGI:1915453|Ensembl:ENSMUSG00000047842	13	protein-coding
151	1439971_at	241688	6330439K17Rik	RIKEN cDNA 6330439K17 gene	3	4.51669	55184	DZANK1	MGI:2139080|Ensembl:ENSMUSG00000037259|Vega:OTTMUSG00000004235	2	protein-coding
152	1440371_at	245684	Cnksr2	connector enhancer of kinase suppressor of Ras 2	1	4.51445	22866	CNKSR2	MGI:2661175|Ensembl:ENSMUSG00000025658|Vega:OTTMUSG00000019390	X	protein-coding
153	1444020_at	330790	Hapln4	hyaluronan and proteoglycan link protein 4	1	4.51115	404037	HAPLN4	MGI:2679531|Ensembl:ENSMUSG00000007594	8	protein-coding
154	1438305_at	116837	Rims1	regulating synaptic membrane exocytosis 1	2	4.50782	22999	RIMS1	MGI:2152971|Ensembl:ENSMUSG00000041670	1	protein-coding
155	1433450_at	12569	Cdk5r1	cyclin-dependent kinase 5, regulatory subunit 1 (p35)	2	4.48486	8851	CDK5R1	MGI:101764|Ensembl:ENSMUSG00000048895|Vega:OTTMUSG00000000218	11	protein-coding
156	1434429_at	238266	Syt16	synaptotagmin XVI	2	4.47538	83851	SYT16	MGI:2673872|Ensembl:ENSMUSG00000044912	12	protein-coding
157	1447825_x_at	18530	Pcdh8	protocadherin 8	2	4.46015	5100	PCDH8	MGI:1306800|Ensembl:ENSMUSG00000036422	14	protein-coding
158	1442370_at	14812	Grin2b	glutamate receptor, ionotropic, NMDA2B (epsilon 2)	0	4.45863	2904	GRIN2B	MGI:95821|Ensembl:ENSMUSG00000030209|Vega:OTTMUSG00000016356	6	protein-coding
159	1454782_at	210933	Bai3	brain-specific angiogenesis inhibitor 3	3	4.4585	577	BAI3	MGI:2441837|Ensembl:ENSMUSG00000033569|Vega:OTTMUSG00000025352	1	protein-coding
160	1435083_at	330695	Ctxn1	cortexin 1	2	4.45403	404217	CTXN1	MGI:88566|Ensembl:ENSMUSG00000048644	8	protein-coding
161	1416286_at	19736	Rgs4	regulator of G-protein signaling 4	4	4.448	5999	RGS4	MGI:108409|Ensembl:ENSMUSG00000038530|Vega:OTTMUSG00000020909	1	protein-coding
162	1435218_at	70727	Rasgef1a	RasGEF domain family, member 1A	1	4.44633	221002	RASGEF1A	MGI:1917977|Ensembl:ENSMUSG00000030134	6	protein-coding
163	1454965_at	241520	Fam171b	family with sequence similarity 171, member B	5	4.42859	165215	FAM171B	MGI:2444579|Ensembl:ENSMUSG00000048388|Vega:OTTMUSG00000013394	2	protein-coding
164	1425213_at	76886	Fam81a	family with sequence similarity 81, member A	0	4.41925	145773	FAM81A	MGI:1924136|Ensembl:ENSMUSG00000032224|Vega:OTTMUSG00000030841	9	protein-coding
165	1440286_at	214931	Fbxl16	F-box and leucine-rich repeat protein 16	3	4.4117	146330	FBXL16	MGI:2448488|Ensembl:ENSMUSG00000025738	17	protein-coding
166	1423091_a_at	14758	Gpm6b	glycoprotein m6b	5	4.39546	2824	GPM6B	MGI:107672|Ensembl:ENSMUSG00000031342|Vega:OTTMUSG00000019536	X	protein-coding
167	1434295_at	19419	Rasgrp1	RAS guanyl releasing protein 1	2	4.38837	10125	RASGRP1	MGI:1314635|Ensembl:ENSMUSG00000027347|Vega:OTTMUSG00000015228	2	protein-coding
168	1433596_at	72685	Dnajc6	DnaJ (Hsp40) homolog, subfamily C, member 6	5	4.38762	9829	DNAJC6	MGI:1919935|Ensembl:ENSMUSG00000028528|Vega:OTTMUSG00000008458	4	protein-coding
169	1429861_at	211712	Pcdh9	protocadherin 9	3	4.38704	5101	PCDH9	MGI:1306801|Ensembl:ENSMUSG00000055421	14	protein-coding
170	1455883_a_at	74342	Lrrtm1	leucine rich repeat transmembrane neuronal 1	1	4.38496	347730	LRRTM1	MGI:2389173|Ensembl:ENSMUSG00000060780|Vega:OTTMUSG00000034534	6	protein-coding
171	1418615_at	11899	Astn1	astrotactin 1	2	4.37541	460	ASTN1	MGI:1098567|Ensembl:ENSMUSG00000026587	1	protein-coding
172	1422695_at	57776	Ttyh1	tweety homolog 1 (Drosophila)	3	4.34585	57348	TTYH1	MGI:1889007|Ensembl:ENSMUSG00000030428|Vega:OTTMUSG00000021913	7	protein-coding
173	1435190_at	12661	Chl1	cell adhesion molecule with homology to L1CAM	4	4.34485	10752	CHL1	MGI:1098266|Ensembl:ENSMUSG00000030077	6	protein-coding
174	1450708_at	20254	Scg2	secretogranin II	4	4.34419	7857	SCG2	MGI:103033|Ensembl:ENSMUSG00000050711	1	protein-coding
175	1433707_at	14397	Gabra4	gamma-aminobutyric acid (GABA) A receptor, subunit alpha 4	2	4.34124	2557	GABRA4	MGI:95616|Ensembl:ENSMUSG00000029211	5	protein-coding
176	1433714_at	29859	Sult4a1	sulfotransferase family 4A, member 1	2	4.34014	25830	SULT4A1	MGI:1888971|Ensembl:ENSMUSG00000018865	15	protein-coding
177	1437787_at	107065	Lrrtm2	leucine rich repeat transmembrane neuronal 2	0	4.31324	26045	LRRTM2	MGI:2389174|Ensembl:ENSMUSG00000071862	18	protein-coding
178	1448397_at	14623	Gjb6	gap junction protein, beta 6	2	4.31297	10804	GJB6	MGI:107588|Ensembl:ENSMUSG00000040055|Vega:OTTMUSG00000034673	14	protein-coding
179	1456283_at	246317	Neto1	neuropilin (NRP) and tolloid (TLL)-like 1	0	4.30526	81832	NETO1	MGI:2180216|Ensembl:ENSMUSG00000050321	18	protein-coding
180	1456478_at	70974	Pgm2l1	phosphoglucomutase 2-like 1	5	4.30508	283209	PGM2L1	MGI:1918224|Ensembl:ENSMUSG00000030729|Vega:OTTMUSG00000032728	7	protein-coding
181	1422592_at	18163	Ctnnd2	catenin (cadherin associated protein), delta 2	3	4.29764	1501	CTNND2	MGI:1195966|Ensembl:ENSMUSG00000022240	15	protein-coding
182	1434641_x_at	233878	Sez6l2	seizure related 6 homolog like 2	4	4.29035	26470	SEZ6L2	MGI:2385295|Ensembl:ENSMUSG00000030683|Vega:OTTMUSG00000023164	7	protein-coding
183	1449264_at	229521	Syt11	synaptotagmin XI	4	4.283	23208	SYT11	MGI:1859547|Ensembl:ENSMUSG00000068923|Vega:OTTMUSG00000022625	3	protein-coding
184	1424482_at	54126	Arhgef7	Rho guanine nucleotide exchange factor (GEF7)	3	4.27832	8874	ARHGEF7	MGI:1860493|Ensembl:ENSMUSG00000031511|Vega:OTTMUSG00000021108	8	protein-coding
185	1418493_a_at	20617	Snca	synuclein, alpha	5	4.27598	6622	SNCA	MGI:1277151|Ensembl:ENSMUSG00000025889	6	protein-coding
186	1434914_at	270192	Rab6b	RAB6B, member RAS oncogene family	2	4.2729	51560	RAB6B	MGI:107283|Ensembl:ENSMUSG00000032549	9	protein-coding
187	1435968_at	19276	Ptprn2	protein tyrosine phosphatase, receptor type, N polypeptide 2	3	4.26711	5799	PTPRN2	MGI:107418|Ensembl:ENSMUSG00000056553	12	protein-coding
188	1430667_at	18526	Pcdh10	protocadherin 10	2	4.26387	57575	PCDH10	MGI:1338042|Ensembl:ENSMUSG00000049100	3	protein-coding
189	1434759_at	216028	Lrrtm3	leucine rich repeat transmembrane neuronal 3	0	4.2626	347731	LRRTM3	MGI:2389177|Ensembl:ENSMUSG00000042846|Vega:OTTMUSG00000023795	10	protein-coding
190	1437744_at	245446	Slitrk4	SLIT and NTRK-like family, member 4	1	4.26238	139065	SLITRK4	MGI:2442509|Ensembl:ENSMUSG00000046699|Vega:OTTMUSG00000017598	X	protein-coding
191	1434270_at	73340	Nptxr	neuronal pentraxin receptor	1	4.25573	23467	NPTXR	MGI:1920590|Ensembl:ENSMUSG00000022421|Vega:OTTMUSG00000034820	15	protein-coding
192	1457423_at	338370	Nalcn	sodium leak channel, non-selective	3	4.24116	259232	NALCN	MGI:2444306|Ensembl:ENSMUSG00000000197	14	protein-coding
193	1452766_at	72948	Tppp	tubulin polymerization promoting protein	3	4.23908	11076	TPPP	MGI:1920198|Ensembl:ENSMUSG00000021573|Vega:OTTMUSG00000027757	13	protein-coding
194	1455258_at	268345	Kcnc2	potassium voltage gated channel, Shaw-related subfamily, member 2	1	4.22379	3747	KCNC2	MGI:96668|Ensembl:ENSMUSG00000035681	10	protein-coding
195	1439843_at	12326	Camk4	calcium/calmodulin-dependent protein kinase IV	2	4.21937	814	CAMK4	MGI:88258|Ensembl:ENSMUSG00000038128	18	protein-coding
196	1426852_x_at	18133	Nov	nephroblastoma overexpressed gene	5	4.21018	4856	NOV	MGI:109185|Ensembl:ENSMUSG00000037362|Vega:OTTMUSG00000033259	15	protein-coding
197	1418105_at	56471	Stmn4	stathmin-like 4	2	4.19843	81551	STMN4	MGI:1931224|Ensembl:ENSMUSG00000022044|Vega:OTTMUSG00000027814	14	protein-coding
198	1460365_a_at	13429	Dnm1	dynamin 1	2	4.18059	1759	DNM1	MGI:107384|Ensembl:ENSMUSG00000026825|Vega:OTTMUSG00000012945	2	protein-coding
199	1425092_at	320873	Cdh10	cadherin 10	2	4.17934	1008	CDH10	MGI:107436|Ensembl:ENSMUSG00000022321	15	protein-coding
200	1448280_at	20977	Syp	synaptophysin	2	4.17268	6855	SYP	MGI:98467|Ensembl:ENSMUSG00000031144|Vega:OTTMUSG00000017756	X	protein-coding
201	1451484_a_at	20964	Syn1	synapsin I	2	4.16608	6853	SYN1	MGI:98460|Ensembl:ENSMUSG00000037217|Vega:OTTMUSG00000017181	X	protein-coding
202	1416852_a_at	26562	Ncdn	neurochondrin	1	4.16293	23154	NCDN	MGI:1347351|Ensembl:ENSMUSG00000028833|Vega:OTTMUSG00000009274	4	protein-coding
203	1437147_at	14406	Gabrg2	gamma-aminobutyric acid (GABA) A receptor, subunit gamma 2	3	4.15892	2566	GABRG2	MGI:95623|Ensembl:ENSMUSG00000020436|Vega:OTTMUSG00000006345	11	protein-coding
204	1429938_at	434008	Gm5567	predicted gene 5567	4	4.15821	100507421	LOC100507421	MGI:3647581|Ensembl:ENSMUSG00000057716	6	protein-coding
205	1436387_at	26556	Homer1	homer homolog 1 (Drosophila)	3	4.15504	9456	HOMER1	MGI:1347345|Ensembl:ENSMUSG00000007617|Vega:OTTMUSG00000016339	13	protein-coding
206	1457984_at	12918	Crh	corticotropin releasing hormone	0	4.15432	1392	CRH	MGI:88496|Ensembl:ENSMUSG00000049796	3	protein-coding
207	1428089_at	76965	Slitrk1	SLIT and NTRK-like family, member 1	2	4.15328	114798	SLITRK1	MGI:2679446|Ensembl:ENSMUSG00000075478	14	protein-coding
208	1439701_at	320227	9330121K16Rik	RIKEN cDNA 9330121K16 gene	0	4.13511			MGI:2443625	8	protein-coding
209	1424624_at	67254	2900011O08Rik	RIKEN cDNA 2900011O08 gene	4	4.13364	89927	C16orf45	MGI:1914504|Ensembl:ENSMUSG00000044117|Vega:OTTMUSG00000026346	16	protein-coding
210	1433474_at	13612	Edil3	EGF-like repeats and discoidin I-like domains 3	5	4.12945	10085	EDIL3	MGI:1329025|Ensembl:ENSMUSG00000034488|Vega:OTTMUSG00000027759	13	protein-coding
211	1419225_at	12294	Cacna2d3	calcium channel, voltage-dependent, alpha2/delta subunit 3	2	4.12204	55799	CACNA2D3	MGI:1338890|Ensembl:ENSMUSG00000021991	14	protein-coding
212	1429175_at	68027	Tmem178	transmembrane protein 178	5	4.1157	130733	TMEM178	MGI:1915277|Ensembl:ENSMUSG00000024245	17	protein-coding
213	1457273_at	23964	Odz2	odd Oz/ten-m homolog 2 (Drosophila)	3	4.10723	57451	ODZ2	MGI:1345184|Ensembl:ENSMUSG00000049336|Vega:OTTMUSG00000005420	11	protein-coding
214	1427288_at	11784	Apba2	amyloid beta (A4) precursor protein-binding, family A, member 2	0	4.10594	321	APBA2	MGI:1261791|Ensembl:ENSMUSG00000030519|Vega:OTTMUSG00000023522	7	protein-coding
215	1419672_at	20745	Spock1	sparc/osteonectin, cwcv and kazal-like domains proteoglycan 1	2	4.10486	6695	SPOCK1	MGI:105371|Ensembl:ENSMUSG00000056222	13	protein-coding
216	1441369_at	383348	Kctd16	potassium channel tetramerisation domain containing 16	0	4.0897	57528	Kctd16	HGNC:29244|MIM:613423|Ensembl:ENSG00000183775|HPRD:17175|Vega:OTTHUMG00000163172	5	protein-coding
217	1436087_at	269109	Dpp10	dipeptidylpeptidase 10	0	4.08928	57628	DPP10	MGI:2442409|Ensembl:ENSMUSG00000036815|Vega:OTTMUSG00000020794	1	protein-coding
218	1435060_at	50876	Tmod2	tropomodulin 2	4	4.08135	29767	TMOD2	MGI:1355335|Ensembl:ENSMUSG00000032186	9	protein-coding
219	1439808_at	320495	Ipcef1	interaction protein for cytohesin exchange factors 1	4	4.07374	26034	IPCEF1	MGI:2444159|Ensembl:ENSMUSG00000064065|Vega:OTTMUSG00000022995	10	protein-coding
220	1420965_a_at	13803	Enc1	ectodermal-neural cortex 1	3	4.07152	8507	ENC1	MGI:109610|Ensembl:ENSMUSG00000041773	13	protein-coding
221	1456885_at	20362	Sept8	septin 8	2	4.06239	23176	SEPT8	MGI:894310|Ensembl:ENSMUSG00000018398|Vega:OTTMUSG00000005635	11	protein-coding
222	1452894_at	15572	Elavl4	ELAV (embryonic lethal, abnormal vision, Drosophila)-like 4 (Hu antigen D)	3	4.05771	1996	ELAVL4	MGI:107427|Ensembl:ENSMUSG00000028546|Vega:OTTMUSG00000008498	4	protein-coding
223	1454674_at	235180	Fez1	fasciculation and elongation protein zeta 1 (zygin I)	4	4.05713	9638	FEZ1	MGI:2670976|Ensembl:ENSMUSG00000032118|Vega:OTTMUSG00000034186	9	protein-coding
224	1418690_at	19283	Ptprz1	protein tyrosine phosphatase, receptor type Z, polypeptide 1	1	4.05406	5803	PTPRZ1	MGI:97816|Ensembl:ENSMUSG00000068748	6	protein-coding
225	1441491_at	18213	Ntrk3	neurotrophic tyrosine kinase, receptor, type 3	1	4.05381	4916	NTRK3	MGI:97385|Ensembl:ENSMUSG00000059146|Vega:OTTMUSG00000021139	7	protein-coding
226	1442786_s_at	52822	Rufy3	RUN and FYVE domain containing 3	5	4.04636	22902	RUFY3	MGI:106484|Ensembl:ENSMUSG00000029291	5	protein-coding
227	1429021_at	13838	Epha4	Eph receptor A4	4	4.03352	2043	EPHA4	MGI:98277|Ensembl:ENSMUSG00000026235	1	protein-coding
228	1435513_at	15560	Htr2c	5-hydroxytryptamine (serotonin) receptor 2C	0	4.03195	3358	HTR2C	MGI:96281|Ensembl:ENSMUSG00000041380|Vega:OTTMUSG00000018943	X	protein-coding
229	1420505_a_at	20910	Stxbp1	syntaxin binding protein 1	4	4.03179	6812	STXBP1	MGI:107363|Ensembl:ENSMUSG00000026797|Vega:OTTMUSG00000012527	2	protein-coding
230	1436094_at	381677	Vgf	VGF nerve growth factor inducible	2	4.02434	7425	VGF	MGI:1343180|Ensembl:ENSMUSG00000037428	5	protein-coding
231	1417151_a_at	18217	Ntsr2	neurotensin receptor 2	1	4.01758	23620	NTSR2	MGI:108018|Ensembl:ENSMUSG00000020591	12	protein-coding
232	1456606_a_at	58250	Chst11	carbohydrate sulfotransferase 11	5	4.01623	50515	CHST11	MGI:1927166|Ensembl:ENSMUSG00000034612|Vega:OTTMUSG00000027827	10	protein-coding
233	1421152_a_at	14681	Gnao1	guanine nucleotide binding protein, alpha O	3	4.00938	2775	GNAO1	MGI:95775|Ensembl:ENSMUSG00000031748|Vega:OTTMUSG00000034033	8	protein-coding
234	1416211_a_at	19242	Ptn	pleiotrophin	4	4.00371	5764	PTN	MGI:97804|Ensembl:ENSMUSG00000029838	6	protein-coding
235	1443119_at	108073	Grm7	glutamate receptor, metabotropic 7	2	4.00298	2917	GRM7	MGI:1351344|Ensembl:ENSMUSG00000056755|Vega:OTTMUSG00000037574	6	protein-coding
236	1457092_at	320265	Fam19a1	family with sequence similarity 19, member A1	1	3.99723	407738	FAM19A1	MGI:2443695|Ensembl:ENSMUSG00000059187|Vega:OTTMUSG00000029712	6	protein-coding
237	1450683_at	56370	Tagln3	transgelin 3	2	3.99487	29114	TAGLN3	MGI:1926784|Ensembl:ENSMUSG00000022658|Vega:OTTMUSG00000026844	16	protein-coding
238	1456609_at	66259	Camk2n1	calcium/calmodulin-dependent protein kinase II inhibitor 1	5	3.9912	55450	CAMK2N1	MGI:1913509|Ensembl:ENSMUSG00000046447|Vega:OTTMUSG00000010002	4	protein-coding
239	1437442_at	54216	Pcdh7	protocadherin 7	5	3.9872	5099	PCDH7	MGI:1860487|Ensembl:ENSMUSG00000029108	5	protein-coding
240	1418317_at	16870	Lhx2	LIM homeobox protein 2	4	3.97948	9355	LHX2	MGI:96785|Ensembl:ENSMUSG00000000247|Vega:OTTMUSG00000012866	2	protein-coding
241	1434990_at	320472	Ppm1e	protein phosphatase 1E (PP2C domain containing)	4	3.97928	22843	PPM1E	MGI:2444096|Ensembl:ENSMUSG00000046442|Vega:OTTMUSG00000001239	11	protein-coding
242	1419420_at	26938	St6galnac5	ST6 (alpha-N-acetyl-neuraminyl-2,3-beta-galactosyl-1,3)-N-acetylgalactosaminide alpha-2,6-sialyltransferase 5	2	3.97568	81849	ST6GALNAC5	MGI:1349471|Ensembl:ENSMUSG00000039037|Vega:OTTMUSG00000030537	3	protein-coding
243	1434526_at	384214	Ephx4	epoxide hydrolase 4	2	3.972	253152	EPHX4	MGI:2686228|Ensembl:ENSMUSG00000033805|Vega:OTTMUSG00000023959	5	protein-coding
244	1435387_at	239606	Slc2a13	solute carrier family 2 (facilitated glucose transporter), member 13	4	3.96855	114134	SLC2A13	MGI:2146030|Ensembl:ENSMUSG00000036298|Vega:OTTMUSG00000020865	15	protein-coding
245	1417954_at	20604	Sst	somatostatin	2	3.96708	6750	SST	MGI:98326|Ensembl:ENSMUSG00000004366	16	protein-coding
246	1454926_at	77629	Sphk1	SPHK1 interactor, AKAP domain containing	4	3.96418	80309	SPHKAP	MGI:1924879|Ensembl:ENSMUSG00000026163|Vega:OTTMUSG00000030288	1	protein-coding
247	1435204_at	381813	Prmt8	protein arginine N-methyltransferase 8	3	3.94965	56341	PRMT8	MGI:3043083|Ensembl:ENSMUSG00000030350|Vega:OTTMUSG00000020414	6	protein-coding
248	1426766_at	103712	6330403K07Rik	RIKEN cDNA 6330403K07 gene	4	3.94854	728392	LOC728392	MGI:1918001	11	protein-coding
249	1434989_at	329178	Unc80	unc-80 homolog (C. elegans)	3	3.94848	285175	UNC80	MGI:2652882|Ensembl:ENSMUSG00000055567|Vega:OTTMUSG00000026091	1	protein-coding
250	1435604_at	68729	Trim37	tripartite motif-containing 37	2	3.91191	4591	TRIM37	MGI:2153072|Ensembl:ENSMUSG00000018548|Vega:OTTMUSG00000001222	11	protein-coding
251	1454768_at	382571	Kcnf1	potassium voltage-gated channel, subfamily F, member 1	3	3.9067	3754	KCNF1	MGI:2687399|Ensembl:ENSMUSG00000051726|Vega:OTTMUSG00000037668	12	protein-coding
252	1428118_at	235402	Lingo1	leucine rich repeat and Ig domain containing 1	1	3.90497	84894	LINGO1	MGI:1915522|Ensembl:ENSMUSG00000049556|Vega:OTTMUSG00000016697	9	protein-coding
253	1437631_at	80334	Kcnip4	Kv channel interacting protein 4	2	3.89655	80333	KCNIP4	MGI:1933131|Ensembl:ENSMUSG00000029088	5	protein-coding
254	1425898_x_at	229759	Olfm3	olfactomedin 3	4	3.89213	118427	OLFM3	MGI:2387329|Ensembl:ENSMUSG00000027965|Vega:OTTMUSG00000026597	3	protein-coding
255	1438007_at	268354	Fam19a2	family with sequence similarity 19, member A2	3	3.88804	338811	FAM19A2	MGI:2143691|Ensembl:ENSMUSG00000044071	10	protein-coding
256	1434638_at	14811	Grin2a	glutamate receptor, ionotropic, NMDA2A (epsilon 1)	1	3.88632	2903	GRIN2A	MGI:95820|Ensembl:ENSMUSG00000059003|Vega:OTTMUSG00000016264	16	protein-coding
257	1429965_at	381338	Lonrf2	LON peptidase N-terminal domain and ring finger 2	5	3.87518	164832	LONRF2	MGI:1920209|Ensembl:ENSMUSG00000048814|Vega:OTTMUSG00000026560	1	protein-coding
258	1435974_at	236915	Arhgef9	CDC42 guanine nucleotide exchange factor (GEF) 9	1	3.87203	23229	ARHGEF9	MGI:2442233|Ensembl:ENSMUSG00000025656|Vega:OTTMUSG00000018030	X	protein-coding
259	1450123_at	20191	Ryr2	ryanodine receptor 2, cardiac	3	3.87018	6262	RYR2	MGI:99685|Ensembl:ENSMUSG00000021313	13	protein-coding
260	1440759_at	16490	Kcna2	potassium voltage-gated channel, shaker-related subfamily, member 2	3	3.86874	3737	KCNA2	MGI:96659|Ensembl:ENSMUSG00000040724	3	protein-coding
261	1425518_at	56508	Rapgef4	Rap guanine nucleotide exchange factor (GEF) 4	5	3.86546	11069	RAPGEF4	MGI:1917723|Ensembl:ENSMUSG00000049044|Vega:OTTMUSG00000013137	2	protein-coding
262	1448628_at	20255	Scg3	secretogranin III	4	3.86488	29106	SCG3	MGI:103032|Ensembl:ENSMUSG00000032181	9	protein-coding
263	1449979_a_at	72902	Spock3	sparc/osteonectin, cwcv and kazal-like domains proteoglycan 3	3	3.86484	50859	SPOCK3	MGI:1920152|Ensembl:ENSMUSG00000054162|Vega:OTTMUSG00000031630	8	protein-coding
264	1424146_at	171469	Gpr37l1	G protein-coupled receptor 37-like 1	0	3.86078	9283	GPR37L1	MGI:1928503|Ensembl:ENSMUSG00000026424|Vega:OTTMUSG00000022102	1	protein-coding
265	1417988_at	19711	Resp18	regulated endocrine-specific protein 18	4	3.85545	389075	RESP18	MGI:1098222|Ensembl:ENSMUSG00000033061|Vega:OTTMUSG00000024507	1	protein-coding
266	1417428_at	14704	Gng3	guanine nucleotide binding protein (G protein), gamma 3	5	3.85533	2785	GNG3	MGI:102704|Ensembl:ENSMUSG00000071658	19	protein-coding
267	1436611_at	277468	Slc39a12	solute carrier family 39 (zinc transporter), member 12	2	3.82277	221074	SLC39A12	MGI:2139274|Ensembl:ENSMUSG00000036949|Vega:OTTMUSG00000011408	2	protein-coding
268	1455148_at	243339	Tmem130	transmembrane protein 130	5	3.81175	222865	TMEM130	MGI:3607706|Ensembl:ENSMUSG00000043388|Vega:OTTMUSG00000025590	5	protein-coding
269	1456570_at	54357	Epb4.1l4b	erythrocyte protein band 4.1-like 4b	4	3.80949	54566	EPB41L4B	MGI:1859149|Ensembl:ENSMUSG00000028434|Vega:OTTMUSG00000007315	4	protein-coding
270	1433602_at	110886	Gabra5	gamma-aminobutyric acid (GABA) A receptor, subunit alpha 5	1	3.80723	2558	GABRA5	MGI:95617|Ensembl:ENSMUSG00000055078	7	protein-coding
271	1439777_at	14007	Celf2	CUGBP, Elav-like family member 2	4	3.80411	10659	CELF2	MGI:1338822|Ensembl:ENSMUSG00000002107|Vega:OTTMUSG00000011788	2	protein-coding
272	1454715_at	76897	Ralyl	RALY RNA binding protein-like	2	3.80297	138046	RALYL	MGI:1924147|Ensembl:ENSMUSG00000039717	3	protein-coding
273	1435767_at	235281	Scn3b	sodium channel, voltage-gated, type III, beta	4	3.80238	55800	SCN3B	MGI:1918882|Ensembl:ENSMUSG00000049281|Vega:OTTMUSG00000016755	9	protein-coding
274	1423343_at	58807	Slco1c1	solute carrier organic anion transporter family, member 1c1	1	3.80038	53919	SLCO1C1	MGI:1889679|Ensembl:ENSMUSG00000030235|Vega:OTTMUSG00000021195	6	protein-coding
275	1455361_at	217480	Dgkb	diacylglycerol kinase, beta	1	3.78954	1607	DGKB	MGI:2442474|Ensembl:ENSMUSG00000036095	12	protein-coding
276	1435895_at	268890	Lsamp	limbic system-associated membrane protein	2	3.78508	4045	LSAMP	MGI:1261760|Ensembl:ENSMUSG00000061080|Vega:OTTMUSG00000016989	16	protein-coding
277	1436237_at	69480	Ttc9	tetratricopeptide repeat domain 9	5	3.78387	23508	TTC9	MGI:1916730|Ensembl:ENSMUSG00000042734	12	protein-coding
278	1436142_at	238276	Akap5	A kinase (PRKA) anchor protein 5	1	3.78044	9495	AKAP5	MGI:2685104|Ensembl:ENSMUSG00000021057|Vega:OTTMUSG00000016317	12	protein-coding
279	1426340_at	20512	Slc1a3	solute carrier family 1 (glial high affinity glutamate transporter), member 3	4	3.77784	6507	SLC1A3	MGI:99917|Ensembl:ENSMUSG00000005360|Vega:OTTMUSG00000032639	15	protein-coding
280	1434342_at	20203	S100b	S100 protein, beta polypeptide, neural	3	3.77772	6285	S100B	MGI:98217|Ensembl:ENSMUSG00000033208|Vega:OTTMUSG00000020277	10	protein-coding
281	1443612_at	228432	Ano3	anoctamin 3	0	3.76411	63982	ANO3	MGI:3613666|Ensembl:ENSMUSG00000074968|Vega:OTTMUSG00000015134	2	protein-coding
282	1439755_at	217692	Sipa1l1	signal-induced proliferation-associated 1 like 1	3	3.76214	26037	SIPA1L1	MGI:2443679|Ensembl:ENSMUSG00000042700	12	protein-coding
283	1455603_at	17968	Ncam2	neural cell adhesion molecule 2	4	3.76189	4685	NCAM2	MGI:97282|Ensembl:ENSMUSG00000022762|Vega:OTTMUSG00000014960	16	protein-coding
284	1441983_at	16522	Kcnj6	potassium inwardly-rectifying channel, subfamily J, member 6	2	3.76122	3763	KCNJ6	MGI:104781|Ensembl:ENSMUSG00000043301	16	protein-coding
285	1423135_at	21838	Thy1	thymus cell antigen 1, theta	4	3.75268	7070	THY1	MGI:98747|Ensembl:ENSMUSG00000032011|Vega:OTTMUSG00000016734	9	protein-coding
286	1454832_at	218194	Phactr1	phosphatase and actin regulator 1	5	3.75006	221692	PHACTR1	MGI:2659021|Ensembl:ENSMUSG00000054728|Vega:OTTMUSG00000023876	13	protein-coding
287	1459971_at	240776	Kcnt2	potassium channel, subfamily T, member 2	3	3.74795	343450	KCNT2	MGI:3036273|Ensembl:ENSMUSG00000052726|Vega:OTTMUSG00000029830	1	protein-coding
288	1429113_at	69017	Prrt2	proline-rich transmembrane protein 2	2	3.73788	112476	PRRT2	MGI:1916267|Ensembl:ENSMUSG00000045114|Vega:OTTMUSG00000033189	7	protein-coding
289	1433607_at	228942	Cbln4	cerebellin 4 precursor protein	2	3.73331	140689	CBLN4	MGI:2154433|Ensembl:ENSMUSG00000067578|Vega:OTTMUSG00000016162	2	protein-coding
290	1460608_at	12287	Cacna1b	calcium channel, voltage-dependent, N type, alpha 1B subunit	3	3.72736	774	CACNA1B	MGI:88296|Ensembl:ENSMUSG00000004113|Vega:OTTMUSG00000012011	2	protein-coding
291	1450070_s_at	18479	Pak1	p21 protein (Cdc42/Rac)-activated kinase 1	5	3.72056	5058	PAK1	MGI:1339975|Ensembl:ENSMUSG00000030774|Vega:OTTMUSG00000021135	7	protein-coding
292	1457032_at	229949	Ak5	adenylate kinase 5	0	3.70656	26289	AK5	MGI:2677491|Ensembl:ENSMUSG00000039058	3	protein-coding
293	1428664_at	22353	Vip	vasoactive intestinal polypeptide	2	3.70645	7432	VIP	MGI:98933|Ensembl:ENSMUSG00000019772	10	protein-coding
294	1440902_at	77767	Ermn	ermin, ERM-like protein	1	3.7058	57471	ERMN	MGI:1925017|Ensembl:ENSMUSG00000026830|Vega:OTTMUSG00000012597	2	protein-coding
295	1448978_at	53972	Ngef	neuronal guanine nucleotide exchange factor	4	3.7051	25791	NGEF	MGI:1858414|Ensembl:ENSMUSG00000026259|Vega:OTTMUSG00000036755	1	protein-coding
296	1436821_at	239318	Plcxd3	phosphatidylinositol-specific phospholipase C, X domain containing 3	5	3.69391	345557	PLCXD3	MGI:2442605|Ensembl:ENSMUSG00000049148|Vega:OTTMUSG00000027967	15	protein-coding
297	1435256_at	76686	Clip3	CAP-GLY domain containing linker protein 3	4	3.68622	25999	CLIP3	MGI:1923936|Ensembl:ENSMUSG00000013921|Vega:OTTMUSG00000024314	7	protein-coding
298	1434672_at	73010	Gpr22	G protein-coupled receptor 22	2	3.68337	2845	GPR22	MGI:1920260|Ensembl:ENSMUSG00000044067|Vega:OTTMUSG00000022806	12	protein-coding
299	1438370_x_at	100503659	Dos	downstream of Stk11	5	3.68276	25507	Dos	MGI:1354170|Ensembl:ENSMUSG00000035640|Vega:OTTMUSG00000000007	10	protein-coding
300	1419063_at	22239	Ugt8a	UDP galactosyltransferase 8A	4	3.68136	7368	UGT8	MGI:109522|Ensembl:ENSMUSG00000032854	3	protein-coding
301	1442019_at	93896	Glp2r	glucagon-like peptide 2 receptor	3	3.67031	9340	GLP2R	MGI:2136733|Ensembl:ENSMUSG00000049928|Vega:OTTMUSG00000005929	11	protein-coding
302	1444077_at	207227	Stxbp5l	syntaxin binding protein 5-like	1	3.66416	9515	STXBP5L	MGI:2443815|Ensembl:ENSMUSG00000022829|Vega:OTTMUSG00000024758	16	protein-coding
303	1440891_at	14802	Gria4	glutamate receptor, ionotropic, AMPA4 (alpha 4)	3	3.65779	2893	GRIA4	MGI:95811|Ensembl:ENSMUSG00000025892	9	protein-coding
304	1437675_at	20541	Slc8a1	solute carrier family 8 (sodium/calcium exchanger), member 1	4	3.6532	6546	SLC8A1	MGI:107956|Ensembl:ENSMUSG00000054640	17	protein-coding
305	1416965_at	30052	Pcsk1n	proprotein convertase subtilisin/kexin type 1 inhibitor	5	3.65063	27344	PCSK1N	MGI:1353431|Ensembl:ENSMUSG00000039278|Vega:OTTMUSG00000018013	X	protein-coding
306	1460482_at	319807	3110047P20Rik	RIKEN cDNA 3110047P20 gene	3	3.64592	57495	KIAA1239	MGI:1920464|Ensembl:ENSMUSG00000090061|Vega:OTTMUSG00000030847	5	protein-coding
307	1435558_at	230775	Bai2	brain-specific angiogenesis inhibitor 2	3	3.64399	576	BAI2	MGI:2451244|Ensembl:ENSMUSG00000028782|Vega:OTTMUSG00000009519	4	protein-coding
308	1450910_at	67252	Cap2	CAP, adenylate cyclase-associated protein, 2 (yeast)	5	3.63296	10486	CAP2	MGI:1914502|Ensembl:ENSMUSG00000021373|Vega:OTTMUSG00000029305	13	protein-coding
309	1435138_at	270028	Fam155a	family with sequence similarity 155, member A	4	3.6321	728215	FAM155A	MGI:2142765|Ensembl:ENSMUSG00000079157	8	protein-coding
310	1425293_a_at	66995	Zcchc18	zinc finger, CCHC domain containing 18	5	3.62765	644353	ZCCHC18	MGI:1914245|Ensembl:ENSMUSG00000031428|Vega:OTTMUSG00000018826	X	protein-coding
311	1439779_at	56533	Rgs17	regulator of G-protein signaling 17	2	3.62742	26575	RGS17	MGI:1927469|Ensembl:ENSMUSG00000019775|Vega:OTTMUSG00000027502	10	protein-coding
312	1454855_at	50791	Magi2	membrane associated guanylate kinase, WW and PDZ domain containing 2	5	3.61997	9863	MAGI2	MGI:1354953|Ensembl:ENSMUSG00000040003|Vega:OTTMUSG00000025140	5	protein-coding
313	1455516_at	77771	Csrnp3	cysteine-serine-rich nuclear protein 3	5	3.61995	80034	CSRNP3	MGI:1925021|Ensembl:ENSMUSG00000044647|Vega:OTTMUSG00000012965	2	protein-coding
314	1445202_at	140904	Caln1	calneuron 1	1	3.61815	83698	CALN1	MGI:2155987|Ensembl:ENSMUSG00000060371|Vega:OTTMUSG00000023954	5	protein-coding
315	1435618_at	239157	Pnma2	paraneoplastic antigen MA2	3	3.60645	10687	PNMA2	MGI:2444129|Ensembl:ENSMUSG00000046204|Vega:OTTMUSG00000035206	14	protein-coding
316	1455021_at	54393	Gabbr1	gamma-aminobutyric acid (GABA) B receptor, 1	4	3.60442	2550	GABBR1	MGI:1860139|Ensembl:ENSMUSG00000024462|Vega:OTTMUSG00000037319	17	protein-coding
317	1435033_at	226970	Arhgef4	Rho guanine nucleotide exchange factor (GEF) 4	4	3.59859	50649	ARHGEF4	MGI:2442507|Ensembl:ENSMUSG00000037509|Vega:OTTMUSG00000033276	1	protein-coding
318	1423561_at	54003	Nell2	NEL-like 2 (chicken)	3	3.59768	4753	NELL2	MGI:1858510|Ensembl:ENSMUSG00000022454	15	protein-coding
319	1456527_at	94253	Hecw1	HECT, C2 and WW domain containing E3 ubiquitin protein ligase 1	2	3.58015	23072	HECW1	MGI:2444115|Ensembl:ENSMUSG00000021301	13	protein-coding
320	1428964_at	71803	Slc25a18	solute carrier family 25 (mitochondrial carrier), member 18	2	3.57965	83733	SLC25A18	MGI:1919053|Ensembl:ENSMUSG00000004902	6	protein-coding
321	1425180_at	73094	Sgip1	SH3-domain GRB2-like (endophilin) interacting protein 1	4	3.57771	84251	SGIP1	MGI:1920344|Ensembl:ENSMUSG00000028524|Vega:OTTMUSG00000008057	4	protein-coding
322	1416711_at	21375	Tbr1	T-box brain gene 1	1	3.5773	10716	TBR1	MGI:107404|Ensembl:ENSMUSG00000035033|Vega:OTTMUSG00000013075	2	protein-coding
323	1420575_at	17751	Mt3	metallothionein 3	2	3.57161	4504	MT3	MGI:97173|Ensembl:ENSMUSG00000031760	8	protein-coding
324	1436719_at	215085	Slc35f1	solute carrier family 35, member F1	4	3.57006	222553	SLC35F1	MGI:2139810|Ensembl:ENSMUSG00000038602|Vega:OTTMUSG00000023982	10	protein-coding
325	1435807_at	12540	Cdc42	cell division cycle 42 homolog (S. cerevisiae)	5	3.55447	64465	Cdc42	MGI:106211|Ensembl:ENSMUSG00000006699|Vega:OTTMUSG00000009829	4	protein-coding
326	1457536_at	103978	Gpc5	glypican 5	0	3.54399	2262	GPC5	MGI:1194894|Ensembl:ENSMUSG00000022112	14	protein-coding
327	1450659_at	24012	Rgs7	regulator of G protein signaling 7	3	3.53776	6000	RGS7	MGI:1346089|Ensembl:ENSMUSG00000026527	1	protein-coding
328	1437927_at	23859	Dlg2	discs, large homolog 2 (Drosophila)	4	3.52419	1740	DLG2	MGI:1344351|Ensembl:ENSMUSG00000052572|Vega:OTTMUSG00000016974	7	protein-coding
329	1429443_at	74020	Cpne4	copine IV	2	3.52169	131034	CPNE4	MGI:1921270|Ensembl:ENSMUSG00000032564|Vega:OTTMUSG00000023466	9	protein-coding
330	1449172_a_at	22342	Lin7b	lin-7 homolog B (C. elegans)	2	3.50326	64130	LIN7B	MGI:1330858|Ensembl:ENSMUSG00000003872|Vega:OTTMUSG00000016518	7	protein-coding
331	1454687_at	238205	Lrfn5	leucine rich repeat and fibronectin type III domain containing 5	2	3.50306	145581	LRFN5	MGI:2144814|Ensembl:ENSMUSG00000035653|Vega:OTTMUSG00000027631	12	protein-coding
332	1443855_at	16502	Kcnc1	potassium voltage gated channel, Shaw-related subfamily, member 1	3	3.48502	3746	KCNC1	MGI:96667|Ensembl:ENSMUSG00000058975|Vega:OTTMUSG00000034762	7	protein-coding
333	1417890_at	57028	Pdxp	pyridoxal (pyridoxine, vitamin B6) phosphatase	5	3.4622	57026	PDXP	MGI:1919282|Ensembl:ENSMUSG00000068221	15	protein-coding
334	1450193_at	15165	Hcn1	hyperpolarization-activated, cyclic nucleotide-gated K+ 1	2	3.45953	348980	HCN1	MGI:1096392|Ensembl:ENSMUSG00000021730|Vega:OTTMUSG00000035649	13	protein-coding
335	1437618_x_at	64450	Gpr85	G protein-coupled receptor 85	4	3.45805	54329	GPR85	MGI:1927851|Ensembl:ENSMUSG00000048216|Vega:OTTMUSG00000022773	6	protein-coding
336	1453008_at	69539	Trnp1	TMF1-regulated nuclear protein 1	4	3.45795	388610	TRNP1	MGI:1916789|Ensembl:ENSMUSG00000056596|Vega:OTTMUSG00000011157	4	protein-coding
337	1427017_at	212712	Satb2	special AT-rich sequence binding protein 2	4	3.45789	23314	SATB2	MGI:2679336|Ensembl:ENSMUSG00000038331|Vega:OTTMUSG00000023028	1	protein-coding
338	1421312_a_at	16581	Kifc2	kinesin family member C2	3	3.45021	90990	KIFC2	MGI:109187|Ensembl:ENSMUSG00000004187	15	protein-coding
339	1429628_at	67412	6330407J23Rik	RIKEN cDNA 6330407J23 gene	5	3.44807	387104	C6orf174	MGI:1914662|Ensembl:ENSMUSG00000038916	10	protein-coding
340	1437156_at	69352	Necab1	N-terminal EF-hand calcium binding protein 1	3	3.44785	64168	NECAB1	MGI:1916602|Ensembl:ENSMUSG00000040536|Vega:OTTMUSG00000004586	4	protein-coding
341	1451045_at	80976	Syt13	synaptotagmin XIII	3	3.44337	57586	SYT13	MGI:1933945|Ensembl:ENSMUSG00000027220|Vega:OTTMUSG00000014492	2	protein-coding
342	1426345_at	213760	Prepl	prolyl endopeptidase-like	5	3.4405	9581	PREPL	MGI:2441932|Ensembl:ENSMUSG00000024127	17	protein-coding
343	1417050_at	67445	C1qtnf4	C1q and tumor necrosis factor related protein 4	5	3.43869	114900	C1QTNF4	MGI:1914695|Ensembl:ENSMUSG00000040794|Vega:OTTMUSG00000014316	2	protein-coding
344	1415978_at	22152	Tubb3	tubulin, beta 3 class III	5	3.42939	10381	TUBB3	MGI:107813|Ensembl:ENSMUSG00000062380|Vega:OTTMUSG00000027611	8	protein-coding
345	1441706_at	114873	Dscaml1	Down syndrome cell adhesion molecule like 1	4	3.41773	57453	DSCAML1	MGI:2150309|Ensembl:ENSMUSG00000032087	9	protein-coding
346	1435578_s_at	13131	Dab1	disabled homolog 1 (Drosophila)	4	3.40275	1600	DAB1	MGI:108554|Ensembl:ENSMUSG00000028519|Vega:OTTMUSG00000008111	4	protein-coding
347	1416361_a_at	13426	Dync1i1	dynein cytoplasmic 1 intermediate chain 1	5	3.39229	1780	DYNC1I1	MGI:107743|Ensembl:ENSMUSG00000029757|Vega:OTTMUSG00000023538	6	protein-coding
348	1423477_at	22771	Zic1	zinc finger protein of the cerebellum 1	4	3.39151	7545	ZIC1	MGI:106683|Ensembl:ENSMUSG00000032368|Vega:OTTMUSG00000020412	9	protein-coding
349	1448125_at	19762	Rit2	Ras-like without CAAX 2	4	3.38982	6014	RIT2	MGI:108054|Ensembl:ENSMUSG00000057455|Vega:OTTMUSG00000033066	18	protein-coding
350	1434819_at	240119	St6gal2	beta galactoside alpha 2,6 sialyltransferase 2	3	3.38301	84620	ST6GAL2	MGI:2445190|Ensembl:ENSMUSG00000024172|Vega:OTTMUSG00000028471	17	protein-coding
351	1424306_at	83603	Elovl4	elongation of very long chain fatty acids (FEN1/Elo2, SUR4/Elo3, yeast)-like 4	4	3.36496	6785	ELOVL4	MGI:1933331|Ensembl:ENSMUSG00000032262	9	protein-coding
352	1423802_at	235604	Camkv	CaM kinase-like vesicle-associated	1	3.35311	79012	CAMKV	MGI:2384296|Ensembl:ENSMUSG00000032936	9	protein-coding
353	1422809_at	116838	Rims2	regulating synaptic membrane exocytosis 2	5	3.35307	9699	RIMS2	MGI:2152972|Ensembl:ENSMUSG00000037386	15	protein-coding
354	1437160_at	192167	Nlgn1	neuroligin 1	2	3.35045	22871	NLGN1	MGI:2179435|Ensembl:ENSMUSG00000063887	3	protein-coding
355	1428852_at	208869	Dock3	dedicator of cyto-kinesis 3	5	3.34781	1795	DOCK3	MGI:2429763|Ensembl:ENSMUSG00000039716|Vega:OTTMUSG00000036142	9	protein-coding
356	1421446_at	18752	Prkcc	protein kinase C, gamma	1	3.34607	5582	PRKCG	MGI:97597|Ensembl:ENSMUSG00000078816	7	protein-coding
357	1450779_at	12140	Fabp7	fatty acid binding protein 7, brain	5	3.34384	2173	FABP7	MGI:101916|Ensembl:ENSMUSG00000019874|Vega:OTTMUSG00000035387	10	protein-coding
358	1435832_at	192198	Lrrc4	leucine rich repeat containing 4	4	3.33907	64101	LRRC4	MGI:2182081|Ensembl:ENSMUSG00000049939|Vega:OTTMUSG00000023270	6	protein-coding
359	1418937_at	13371	Dio2	deiodinase, iodothyronine, type II	5	3.32993	1734	DIO2	MGI:1338833|Ensembl:ENSMUSG00000007682	12	protein-coding
360	1447669_s_at	14706	Gng4	guanine nucleotide binding protein (G protein), gamma 4	4	3.32563	2786	GNG4	MGI:102703|Ensembl:ENSMUSG00000021303|Vega:OTTMUSG00000029824	13	protein-coding
361	1435424_x_at	72555	Shisa9	shisa homolog 9 (Xenopus laevis)	4	3.31931	729993	SHISA9	MGI:1919805|Ensembl:ENSMUSG00000022494	16	protein-coding
362	1419414_at	64337	Gng13	guanine nucleotide binding protein (G protein), gamma 13	3	3.31484	51764	GNG13	MGI:1925616|Ensembl:ENSMUSG00000025739|Vega:OTTMUSG00000035881	17	protein-coding
363	1433945_at	70638	Fam189a1	family with sequence similarity 189, member A1	3	3.31061	23359	FAM189A1	MGI:1917888|Ensembl:ENSMUSG00000030518|Vega:OTTMUSG00000031035	7	protein-coding
364	1431076_at	11519	Add2	adducin 2 (beta)	5	3.29336	119	ADD2	MGI:87919|Ensembl:ENSMUSG00000030000	6	protein-coding
365	1419200_at	57780	Fxyd7	FXYD domain-containing ion transport regulator 7	4	3.29241	53822	FXYD7	MGI:1889006|Ensembl:ENSMUSG00000036578	7	protein-coding
366	1429651_at	74189	Phactr3	phosphatase and actin regulator 3	5	3.27827	116154	PHACTR3	MGI:1921439|Ensembl:ENSMUSG00000027525|Vega:OTTMUSG00000016326	2	protein-coding
367	1422834_at	16508	Kcnd2	potassium voltage-gated channel, Shal-related family, member 2	5	3.2758	3751	KCND2	MGI:102663|Ensembl:ENSMUSG00000060882|Vega:OTTMUSG00000036888	6	protein-coding
368	1418500_at	54561	Nap1l3	nucleosome assembly protein 1-like 3	5	3.26765	4675	NAP1L3	MGI:1859565|Ensembl:ENSMUSG00000055733|Vega:OTTMUSG00000018572	X	protein-coding
369	1416967_at	20674	Sox2	SRY-box containing gene 2	5	3.26098	6657	SOX2	MGI:98364|Ensembl:ENSMUSG00000074637|Vega:OTTMUSG00000021249	3	protein-coding
370	1435871_at	15571	Elavl3	ELAV (embryonic lethal, abnormal vision, Drosophila)-like 3 (Hu antigen C)	3	3.25761	1995	ELAVL3	MGI:109157|Ensembl:ENSMUSG00000003410	9	protein-coding
371	1455925_at	77630	Prdm8	PR domain containing 8	3	3.2568	56978	PRDM8	MGI:1924880|Ensembl:ENSMUSG00000035456	5	protein-coding
372	1429416_at	73032	Ttc9b	tetratricopeptide repeat domain 9B	3	3.25271	148014	TTC9B	MGI:1920282|Ensembl:ENSMUSG00000007944|Vega:OTTMUSG00000023957	7	protein-coding
373	1453273_at	67498	Kcnv1	potassium channel, subfamily V, member 1	0	3.25134	27012	KCNV1	MGI:1914748|Ensembl:ENSMUSG00000022342	15	protein-coding
374	1436998_at	237761	Ankrd43	sosondowah ankyrin repeat domain family member A	5	3.23767	134548	SOWAHA	MGI:2687280|Ensembl:ENSMUSG00000044352|Vega:OTTMUSG00000005638	11	protein-coding
375	1416783_at	21333	Tac1	tachykinin 1	5	3.23663	6863	TAC1	MGI:98474|Ensembl:ENSMUSG00000061762	6	protein-coding
376	1445679_at	320707	Atp2b3	ATPase, Ca++ transporting, plasma membrane 3	4	3.22689	492	ATP2B3	MGI:1347353|Ensembl:ENSMUSG00000031376|Vega:OTTMUSG00000017670	X	protein-coding
377	1435404_at	214240	Disp2	dispatched homolog 2 (Drosophila)	5	3.22306	85455	DISP2	MGI:2388733|Ensembl:ENSMUSG00000040035|Vega:OTTMUSG00000015642	2	protein-coding
378	1435197_at	18993	Pou3f3	POU domain, class 3, transcription factor 3	4	3.19626	5455	POU3F3	MGI:102564|Ensembl:ENSMUSG00000045515|Vega:OTTMUSG00000022569	1	protein-coding
379	1452380_at	13841	Epha7	Eph receptor A7	2	3.19581	2045	EPHA7	MGI:95276|Ensembl:ENSMUSG00000028289|Vega:OTTMUSG00000004869	4	protein-coding
380	1430600_at	67272	Cmtm5	CKLF-like MARVEL transmembrane domain containing 5	4	3.19217	116173	CMTM5	MGI:2447164|Ensembl:ENSMUSG00000040759	14	protein-coding
381	1435307_at	218440	Ankrd34b	ankyrin repeat domain 34B	4	3.1906	340120	ANKRD34B	MGI:2443245|Ensembl:ENSMUSG00000045034|Vega:OTTMUSG00000036592	13	protein-coding
382	1439607_at	241919	Slc7a14	solute carrier family 7 (cationic amino acid transporter, y+ system), member 14	4	3.18306	57709	SLC7A14	MGI:3040688|Ensembl:ENSMUSG00000069072|Vega:OTTMUSG00000022774	3	protein-coding
383	1421017_at	18183	Nrg3	neuregulin 3	3	3.18223	10718	NRG3	MGI:1097165|Ensembl:ENSMUSG00000041014|Vega:OTTMUSG00000037129	14	protein-coding
384	1428792_at	76960	Bcas1	breast carcinoma amplified sequence 1	5	3.17987	8537	BCAS1	MGI:1924210|Ensembl:ENSMUSG00000013523|Vega:OTTMUSG00000016099	2	protein-coding
385	1435392_at	244484	Wdr17	WD repeat domain 17	3	3.17136	116966	WDR17	MGI:1924662|Ensembl:ENSMUSG00000039375|Vega:OTTMUSG00000026034	8	protein-coding
386	1450712_at	16524	Kcnj9	potassium inwardly-rectifying channel, subfamily J, member 9	2	3.16797	3765	KCNJ9	MGI:108007|Ensembl:ENSMUSG00000038026	1	protein-coding
387	1429204_at	73047	Camk2n2	calcium/calmodulin-dependent protein kinase II inhibitor 2	5	3.16552	94032	CAMK2N2	MGI:1920297|Ensembl:ENSMUSG00000051146|Vega:OTTMUSG00000028771	16	protein-coding
388	1433906_at	74438	Clvs1	clavesin 1	5	3.1633	157807	CLVS1	MGI:1921688|Ensembl:ENSMUSG00000041216|Vega:OTTMUSG00000004383	4	protein-coding
389	1453329_s_at	432450	Nkain2	Na+/K+ transporting ATPase interacting 2	2	3.15596	154215	NKAIN2	MGI:1923447|Ensembl:ENSMUSG00000069671	10	protein-coding
390	1436127_at	12919	Crhbp	corticotropin releasing hormone binding protein	2	3.15162	1393	CRHBP	MGI:88497|Ensembl:ENSMUSG00000021680	13	protein-coding
391	1455799_at	225998	Rorb	RAR-related orphan receptor beta	5	3.13966	6096	RORB	MGI:1343464|Ensembl:ENSMUSG00000036192|Vega:OTTMUSG00000023329	19	protein-coding
392	1435790_at	244723	Olfm2	olfactomedin 2	5	3.13426	93145	OLFM2	MGI:3045350|Ensembl:ENSMUSG00000032172	9	protein-coding
393	1428379_at	140919	Slc17a6	solute carrier family 17 (sodium-dependent inorganic phosphate cotransporter), member 6	3	3.13075	57084	SLC17A6	MGI:2156052|Ensembl:ENSMUSG00000030500	7	protein-coding
394	1449381_a_at	23969	Pacsin1	protein kinase C and casein kinase substrate in neurons 1	5	3.1291	29993	PACSIN1	MGI:1345181|Ensembl:ENSMUSG00000040276|Vega:OTTMUSG00000021338	17	protein-coding
395	1449286_at	80883	Ntng1	netrin G1	4	3.12253	22854	NTNG1	MGI:1934028|Ensembl:ENSMUSG00000059857	3	protein-coding
396	1438780_at	56216	Stx1b	syntaxin 1B	5	3.12167	112755	STX1B	MGI:1930705|Ensembl:ENSMUSG00000030806|Vega:OTTMUSG00000031121	7	protein-coding
397	1418271_at	59058	Bhlhe22	basic helix-loop-helix family, member e22	5	3.10049	27319	BHLHE22	MGI:1930001|Ensembl:ENSMUSG00000025128|Vega:OTTMUSG00000018225	3	protein-coding
398	1419517_at	72978	Cnih3	cornichon homolog 3 (Drosophila)	5	3.08213	149111	CNIH3	MGI:1920228|Ensembl:ENSMUSG00000026514|Vega:OTTMUSG00000034937	1	protein-coding
399	1436148_at	21960	Tnr	tenascin R	3	3.07809	7143	TNR	MGI:99516|Ensembl:ENSMUSG00000015829	1	protein-coding
400	1442561_at	320772	Mdga2	MAM domain containing glycosylphosphatidylinositol anchor 2	2	3.07684	161357	MDGA2	MGI:2444706|Ensembl:ENSMUSG00000034912	12	protein-coding
401	1457587_at	226922	Kcnq5	potassium voltage-gated channel, subfamily Q, member 5	5	3.06431	56479	KCNQ5	MGI:1924937|Ensembl:ENSMUSG00000028033|Vega:OTTMUSG00000019675	1	protein-coding
402	1431826_a_at	75770	Brsk2	BR serine/threonine kinase 2	4	3.05165	9024	BRSK2	MGI:1923020|Ensembl:ENSMUSG00000053046|Vega:OTTMUSG00000036942	7	protein-coding
403	1438399_at	58869	Pex5l	peroxisomal biogenesis factor 5-like	5	3.04019	51555	PEX5L	MGI:1916672|Ensembl:ENSMUSG00000027674|Vega:OTTMUSG00000023437	3	protein-coding
404	1420537_at	67516	Kctd4	potassium channel tetramerisation domain containing 4	5	3.02772	386618	KCTD4	MGI:1914766|Ensembl:ENSMUSG00000046523	14	protein-coding
405	1457156_at	237553	Trhde	TRH-degrading enzyme	5	3.00496	29953	TRHDE	MGI:2384311|Ensembl:ENSMUSG00000050663|Vega:OTTMUSG00000025680	10	protein-coding
406	1428866_at	72125	Fam123a	family with sequence similarity 123, member A	5	2.98176	219287	FAM123A	MGI:1919375|Ensembl:ENSMUSG00000021986	14	protein-coding
