# Supplementary material for: Functionally Enigmatic Genes: A Case Study of the Brain Ignorome
Source: PLoS One. 2014 Feb 11;9(2):e88889. doi: 10.1371/journal.pone.0088889 (PMC3921226; doi:10.1371/journal.pone.0088889)
Supplement: Table S3 — (XLS) [file pone.0088889.s004.xls]

## Sheet: Table S2
	Table S3 : Intense and selectively expressed brain genes identified using Illumina MouseRef-6 v2.0 microarray platform. Genes selected have a brain-to-Nonbrain ratio of 8 and expression value >9.
	Data from: Microarray data from Williams Lab consisting of 26 tissues including brain.
	Citation: N/A
	Annotation files used: Probes were mapped back to the mouse genome (NCBI mouse genome assembly 36) to identify the probe locations and corresponding RefSeq transcripts. Also, RNAseq data from Williams Lab has been used in few cases.
	Processed By: Ashutosh K Pandey
	Last edited on: 03/29/2013
	Link for the microarray data: http://genenetwork.org/dbdoc/ILM_B_D_CNS_GI_avg_0508.html
Index	Probe ID	Mouse GeneID	Gene Symbol	Gene Description	N of tissues with expression similar to brain	log(Ratio of Brain/Avg. of 22 other non-Brain tissues)	GeneID (Human)	Gene Symbol (Human)	MGI and Ensembl GeneIDs	Chromosome (Mouse)	Gene-type
1	ILMN_1226042	12889	Cplx1	complexin 1	1	8.43012	10815	CPLX1	MGI:104727|Ensembl:ENSMUSG00000033615|Vega:OTTMUSG00000028893	5	protein-coding
2	ILMN_1233146	19417	Rasgrf1	RAS protein-specific guanine nucleotide-releasing factor 1	1	7.49421	5923	RASGRF1	MGI:99694|Ensembl:ENSMUSG00000032356	9	protein-coding
3	ILMN_2760105	50914	Olig1	oligodendrocyte transcription factor 1	0	7.40424	116448	OLIG1	MGI:1355334|Ensembl:ENSMUSG00000046160|Vega:OTTMUSG00000019872	16	protein-coding
4	ILMN_1234039	22348	Slc32a1	solute carrier family 32 (GABA vesicular transporter), member 1	1	7.32639	140679	SLC32A1	MGI:1194488|Ensembl:ENSMUSG00000037771|Vega:OTTMUSG00000015925	2	protein-coding
5	ILMN_2516974	76376	Slc24a2	solute carrier family 24 (sodium/potassium/calcium exchanger), member 2	2	7.27815	25769	SLC24A2	MGI:1923626|Ensembl:ENSMUSG00000037996|Vega:OTTMUSG00000007637	4	protein-coding
6	ILMN_1234988	14415	Gad1	glutamic acid decarboxylase 1	1	7.23003	2571	GAD1	MGI:95632|Ensembl:ENSMUSG00000070880|Vega:OTTMUSG00000033269	2	protein-coding
7	ILMN_1224963	20979	Syt1	synaptotagmin I	1	7.16649	6857	SYT1	MGI:99667|Ensembl:ENSMUSG00000035864|Vega:OTTMUSG00000016266	10	protein-coding
8	ILMN_1258935	29859	Sult4a1	sulfotransferase family 4A, member 1	1	7.00892	25830	SULT4A1	MGI:1888971|Ensembl:ENSMUSG00000018865	15	protein-coding
9	ILMN_2737200	17196	Mbp	myelin basic protein	1	6.93822	4155	MBP	MGI:96925|Ensembl:ENSMUSG00000041607|Vega:OTTMUSG00000016316	18	protein-coding
10	ILMN_2741629	243339	Tmem130	transmembrane protein 130	1	6.90254	222865	TMEM130	MGI:3607706|Ensembl:ENSMUSG00000043388|Vega:OTTMUSG00000025590	5	protein-coding
11	ILMN_1220054	208666	Diras1	DIRAS family, GTP-binding RAS-like 1	1	6.88306	148252	DIRAS1	MGI:2183442|Ensembl:ENSMUSG00000043670|Vega:OTTMUSG00000030296	10	protein-coding
12	ILMN_2438724	26950	Vsnl1	visinin-like 1	2	6.87803	7447	VSNL1	MGI:1349453|Ensembl:ENSMUSG00000054459	12	protein-coding
13	ILMN_1221546	94090	Trim9	tripartite motif-containing 9	1	6.81437	114088	TRIM9	MGI:2137354|Ensembl:ENSMUSG00000021071	12	protein-coding
14	ILMN_1235133	20964	Syn1	synapsin I	1	6.794	6853	SYN1	MGI:98460|Ensembl:ENSMUSG00000037217|Vega:OTTMUSG00000017181	X	protein-coding
15	ILMN_2702887	64051	Sv2a	synaptic vesicle glycoprotein 2 a	1	6.7916	9900	SV2A	MGI:1927139|Ensembl:ENSMUSG00000038486|Vega:OTTMUSG00000021899	3	protein-coding
16	ILMN_2630182	20977	Syp	synaptophysin	1	6.7782	6855	SYP	MGI:98467|Ensembl:ENSMUSG00000031144|Vega:OTTMUSG00000017756	X	protein-coding
17	ILMN_1237399	19762	Rit2	Ras-like without CAAX 2	1	6.69778	6014	RIT2	MGI:108054|Ensembl:ENSMUSG00000057455|Vega:OTTMUSG00000033066	18	protein-coding
18	ILMN_2763002	13807	Eno2	enolase 2, gamma neuronal	1	6.69658	2026	ENO2	MGI:95394|Ensembl:ENSMUSG00000004267|Vega:OTTMUSG00000022240	6	protein-coding
19	ILMN_2745930	56370	Tagln3	transgelin 3	1	6.6872	29114	TAGLN3	MGI:1926784|Ensembl:ENSMUSG00000022658|Vega:OTTMUSG00000026844	16	protein-coding
20	ILMN_2724044	104069	Sncb	synuclein, beta	1	6.67367	6620	SNCB	MGI:1889011|Ensembl:ENSMUSG00000034891|Vega:OTTMUSG00000032668	13	protein-coding
21	ILMN_2765454	68666	Svop	SV2 related protein	2	6.66232	55530	SVOP	MGI:1915916|Ensembl:ENSMUSG00000042078|Vega:OTTMUSG00000030561	5	protein-coding
22	ILMN_3065852	16572	Kif5a	kinesin family member 5A	0	6.62174	3798	KIF5A	MGI:109564|Ensembl:ENSMUSG00000074657	10	protein-coding
23	ILMN_2480669	269774	Aak1	AP2 associated kinase 1	1	6.59264	22848	AAK1	MGI:1098687|Ensembl:ENSMUSG00000057230|Vega:OTTMUSG00000024486	6	protein-coding
24	ILMN_2603450	18377	Omg	oligodendrocyte myelin glycoprotein	1	6.58565	4974	OMG	MGI:106586|Ensembl:ENSMUSG00000049612|Vega:OTTMUSG00000000194	11	protein-coding
25	ILMN_2758070	104001	Rtn1	reticulon 1	1	6.55852	6252	RTN1	MGI:1933947|Ensembl:ENSMUSG00000021087|Vega:OTTMUSG00000016329	12	protein-coding
26	ILMN_1227221	241263	Gpr158	G protein-coupled receptor 158	1	6.51077	57512	GPR158	MGI:2441697|Ensembl:ENSMUSG00000045967|Vega:OTTMUSG00000011438	2	protein-coding
27	ILMN_2734090	277432	Vstm2l	V-set and transmembrane domain containing 2-like	1	6.50481	128434	VSTM2L	MGI:2685537|Ensembl:ENSMUSG00000037843|Vega:OTTMUSG00000015887	2	protein-coding
28	ILMN_1225704	20262	Stmn3	stathmin-like 3	1	6.47961	50861	STMN3	MGI:1277137|Ensembl:ENSMUSG00000027581|Vega:OTTMUSG00000016652	2	protein-coding
29	ILMN_2547305	17433	Mobp	myelin-associated oligodendrocytic basic protein	0	6.46342	4336	MOBP	MGI:108511|Ensembl:ENSMUSG00000032517|Vega:OTTMUSG00000037099	9	protein-coding
30	ILMN_1232850	12891	Cpne6	copine VI	1	6.45423	9362	CPNE6	MGI:1334445|Ensembl:ENSMUSG00000022212|Vega:OTTMUSG00000035549	14	protein-coding
31	ILMN_2827729	12308	Calb2	calbindin 2	2	6.44033	794	CALB2	MGI:101914|Ensembl:ENSMUSG00000003657	8	protein-coding
32	ILMN_1249022	140904	Caln1	calneuron 1	2	6.4271	83698	CALN1	MGI:2155987|Ensembl:ENSMUSG00000060371|Vega:OTTMUSG00000023954	5	protein-coding
33	ILMN_2649172	66995	Zcchc18	zinc finger, CCHC domain containing 18	1	6.41374	644353	ZCCHC18	MGI:1914245|Ensembl:ENSMUSG00000031428|Vega:OTTMUSG00000018826	X	protein-coding
34	ILMN_1233840	16560	Kif1a	kinesin family member 1A	3	6.39304	547	KIF1A	MGI:108391|Ensembl:ENSMUSG00000014602	1	protein-coding
35	ILMN_2476948	14402	Gabrb3	gamma-aminobutyric acid (GABA) A receptor, subunit beta 3	2	6.37195	2562	GABRB3	MGI:95621|Ensembl:ENSMUSG00000033676|Vega:OTTMUSG00000031173	7	protein-coding
36	ILMN_1236932	76897	Ralyl	RALY RNA binding protein-like	1	6.35107	138046	RALYL	MGI:1924147|Ensembl:ENSMUSG00000039717	3	protein-coding
37	ILMN_2460754	14417	Gad2	glutamic acid decarboxylase 2	1	6.33107	2572	GAD2	MGI:95634|Ensembl:ENSMUSG00000026787|Vega:OTTMUSG00000011505	2	protein-coding
38	ILMN_2644415	23969	Pacsin1	protein kinase C and casein kinase substrate in neurons 1	1	6.33029	29993	PACSIN1	MGI:1345181|Ensembl:ENSMUSG00000040276|Vega:OTTMUSG00000021338	17	protein-coding
39	ILMN_2677569	270028	Fam155a	family with sequence similarity 155, member A	1	6.31808	728215	FAM155A	MGI:2142765|Ensembl:ENSMUSG00000079157	8	protein-coding
40	ILMN_1214737	15571	Elavl3	ELAV (embryonic lethal, abnormal vision, Drosophila)-like 3 (Hu antigen C)	1	6.25531	1995	ELAVL3	MGI:109157|Ensembl:ENSMUSG00000003410	9	protein-coding
41	ILMN_2505510	52897	Rbfox3	RNA binding protein, fox-1 homolog (C. elegans) 3	1	6.20818	146713	RBFOX3	MGI:106368|Ensembl:ENSMUSG00000025576|Vega:OTTMUSG00000003975	11	protein-coding
42	ILMN_2680737	14800	Gria2	glutamate receptor, ionotropic, AMPA2 (alpha 2)	1	6.18571	2891	GRIA2	MGI:95809|Ensembl:ENSMUSG00000033981	3	protein-coding
43	ILMN_2592953	20394	Scg5	secretogranin V	2	6.16903	6447	SCG5	MGI:98289|Ensembl:ENSMUSG00000023236|Vega:OTTMUSG00000019161	2	protein-coding
44	ILMN_2875404	78593	Nrip3	nuclear receptor interacting protein 3	0	6.16351	56675	NRIP3	MGI:1925843|Ensembl:ENSMUSG00000034825|Vega:OTTMUSG00000027286	7	protein-coding
45	ILMN_2690014	20983	Syt4	synaptotagmin IV	1	6.15382	6860	SYT4	MGI:101759|Ensembl:ENSMUSG00000024261	18	protein-coding
46	ILMN_3160137	11676	Aldoc	aldolase C, fructose-bisphosphate	1	6.1475	230	ALDOC	MGI:101863|Ensembl:ENSMUSG00000017390|Vega:OTTMUSG00000000108	11	protein-coding
47	ILMN_1246139	18417	Cldn11	claudin 11	3	6.13248	5010	CLDN11	MGI:106925|Ensembl:ENSMUSG00000037625|Vega:OTTMUSG00000022650	3	protein-coding
48	ILMN_1236175	22153	Tubb4a	tubulin, beta 4A class IVA	0	6.1276	10382	TUBB4A	MGI:107848|Ensembl:ENSMUSG00000062591	17	protein-coding
49	ILMN_1237021	17136	Mag	myelin-associated glycoprotein	1	6.1187	4099	MAG	MGI:96912|Ensembl:ENSMUSG00000036634	7	protein-coding
50	ILMN_2769234	18217	Ntsr2	neurotensin receptor 2	1	6.11002	23620	NTSR2	MGI:108018|Ensembl:ENSMUSG00000020591	12	protein-coding
51	ILMN_1258636	27062	Cadps	Ca2+-dependent secretion activator	1	6.07866	8618	CADPS	MGI:1350922|Ensembl:ENSMUSG00000054423	14	protein-coding
52	ILMN_1228796	66237	Atp6v1g2	ATPase, H+ transporting, lysosomal V1 subunit G2	1	6.07024	534	ATP6V1G2	MGI:1913487|Ensembl:ENSMUSG00000024403|Vega:OTTMUSG00000031451	17	protein-coding
53	ILMN_1232107	12069	Bex2	brain expressed X-linked 2	3	6.06675	84707	BEX2	MGI:1338017|Ensembl:ENSMUSG00000042750|Vega:OTTMUSG00000018777	X	protein-coding
54	ILMN_2704027	71803	Slc25a18	solute carrier family 25 (mitochondrial carrier), member 18	0	6.06674	83733	SLC25A18	MGI:1919053|Ensembl:ENSMUSG00000004902	6	protein-coding
55	ILMN_1221763	17933	Myt1l	myelin transcription factor 1-like	1	6.06034	23040	MYT1L	MGI:1100511|Ensembl:ENSMUSG00000061911	12	protein-coding
56	ILMN_2429238	76965	Slitrk1	SLIT and NTRK-like family, member 1	0	6.05889	114798	SLITRK1	MGI:2679446|Ensembl:ENSMUSG00000075478	14	protein-coding
57	ILMN_2708717	76898	B3gat1	beta-1,3-glucuronyltransferase 1 (glucuronosyltransferase P)	1	6.0486	27087	B3GAT1	MGI:1924148|Ensembl:ENSMUSG00000045994|Vega:OTTMUSG00000028627	9	protein-coding
58	ILMN_1245326	12805	Cntn1	contactin 1	1	6.03659	1272	CNTN1	MGI:105980|Ensembl:ENSMUSG00000055022|Vega:OTTMUSG00000014988	15	protein-coding
59	ILMN_1216662	16574	Kif5c	kinesin family member 5C	1	6.0001	3800	KIF5C	MGI:1098269|Ensembl:ENSMUSG00000026764|Vega:OTTMUSG00000012481	2	protein-coding
60	ILMN_1243949	227325	Dner	delta/notch-like EGF-related receptor	2	5.99838	92737	DNER	MGI:2152889|Ensembl:ENSMUSG00000036766	1	protein-coding
61	ILMN_2655862	20974	Syngr3	synaptogyrin 3	1	5.98146	9143	SYNGR3	MGI:1341881|Ensembl:ENSMUSG00000007021|Vega:OTTMUSG00000028128	17	protein-coding
62	ILMN_2756226	382018	Unc13a	unc-13 homolog A (C. elegans)	1	5.97026	23025	UNC13A	MGI:3051532|Ensembl:ENSMUSG00000034799	8	protein-coding
63	ILMN_1240381	18823	Plp1	proteolipid protein (myelin) 1	1	5.94907	5354	PLP1	MGI:97623|Ensembl:ENSMUSG00000031425|Vega:OTTMUSG00000016519	X	protein-coding
64	ILMN_2764651	17751	Mt3	metallothionein 3	1	5.94458	4504	MT3	MGI:97173|Ensembl:ENSMUSG00000031760	8	protein-coding
65	ILMN_2639674	18549	Pcsk2	proprotein convertase subtilisin/kexin type 2	0	5.93731	5126	PCSK2	MGI:97512|Ensembl:ENSMUSG00000027419|Vega:OTTMUSG00000003089	2	protein-coding
66	ILMN_2615412	64337	Gng13	guanine nucleotide binding protein (G protein), gamma 13	1	5.92276	51764	GNG13	MGI:1925616|Ensembl:ENSMUSG00000025739|Vega:OTTMUSG00000035881	17	protein-coding
67	ILMN_1238627	319317	Snhg11	small nucleolar RNA host gene 11	2	5.90736	128439	SNHG11	MGI:2441845|Ensembl:ENSMUSG00000044349|Vega:OTTMUSG00000015934	2	protein-coding
68	ILMN_2922321	140919	Slc17a6	solute carrier family 17 (sodium-dependent inorganic phosphate cotransporter), member 6	1	5.90348	57084	SLC17A6	MGI:2156052|Ensembl:ENSMUSG00000030500	7	protein-coding
69	ILMN_1216021	57776	Ttyh1	tweety homolog 1 (Drosophila)	1	5.9028	57348	TTYH1	MGI:1889007|Ensembl:ENSMUSG00000030428|Vega:OTTMUSG00000021913	7	protein-coding
70	ILMN_2453312	224997	Dlgap1	discs, large (Drosophila) homolog-associated protein 1	2	5.90194	9229	DLGAP1	MGI:1346065|Ensembl:ENSMUSG00000003279|Vega:OTTMUSG00000033115	17	protein-coding
71	ILMN_2787238	15444	Hpca	hippocalcin	1	5.87372	3208	HPCA	MGI:1336200|Ensembl:ENSMUSG00000028785|Vega:OTTMUSG00000009624	4	protein-coding
72	ILMN_1253304	20257	Stmn2	stathmin-like 2	1	5.85864	11075	STMN2	MGI:98241|Ensembl:ENSMUSG00000027500	3	protein-coding
73	ILMN_2697205	11899	Astn1	astrotactin 1	1	5.84877	460	ASTN1	MGI:1098567|Ensembl:ENSMUSG00000026587	1	protein-coding
74	ILMN_1218245	210933	Bai3	brain-specific angiogenesis inhibitor 3	1	5.84664	577	BAI3	MGI:2441837|Ensembl:ENSMUSG00000033569|Vega:OTTMUSG00000025352	1	protein-coding
75	ILMN_2636325	67254	2900011O08Rik	RIKEN cDNA 2900011O08 gene	1	5.84261	89927	C16orf45	MGI:1914504|Ensembl:ENSMUSG00000044117|Vega:OTTMUSG00000026346	16	protein-coding
76	ILMN_1221295	14799	Gria1	glutamate receptor, ionotropic, AMPA1 (alpha 1)	1	5.82828	2890	GRIA1	MGI:95808|Ensembl:ENSMUSG00000020524|Vega:OTTMUSG00000005703	11	protein-coding
77	ILMN_3161718	60597	Mapk8ip2	mitogen-activated protein kinase 8 interacting protein 2	2	5.80298	23542	MAPK8IP2	MGI:1926555|Ensembl:ENSMUSG00000022619|Vega:OTTMUSG00000032609	15	protein-coding
78	ILMN_2757844	76484	Kndc1	kinase non-catalytic C-lobe domain (KIND) containing 1	2	5.77362	85442	KNDC1	MGI:1923734|Ensembl:ENSMUSG00000066129	7	protein-coding
79	ILMN_1240537	74100	Arpp21	cyclic AMP-regulated phosphoprotein, 21	2	5.77186	10777	ARPP21	MGI:107562|Ensembl:ENSMUSG00000032503|Vega:OTTMUSG00000034741	9	protein-coding
80	ILMN_1259339	12569	Cdk5r1	cyclin-dependent kinase 5, regulatory subunit 1 (p35)	1	5.74402	8851	CDK5R1	MGI:101764|Ensembl:ENSMUSG00000048895|Vega:OTTMUSG00000000218	11	protein-coding
81	ILMN_2740306	243621	Iqsec3	IQ motif and Sec7 domain 3	1	5.72176	440073	IQSEC3	MGI:2677208|Ensembl:ENSMUSG00000040797|Vega:OTTMUSG00000023463	6	protein-coding
82	ILMN_1228515	330369	Fbxo41	F-box protein 41	1	5.69637	150726	FBXO41	MGI:1261912|Ensembl:ENSMUSG00000047013|Vega:OTTMUSG00000029064	6	protein-coding
83	ILMN_2644229	16508	Kcnd2	potassium voltage-gated channel, Shal-related family, member 2	1	5.69365	3751	KCND2	MGI:102663|Ensembl:ENSMUSG00000060882|Vega:OTTMUSG00000036888	6	protein-coding
84	ILMN_2761430	270192	Rab6b	RAB6B, member RAS oncogene family	1	5.67959	51560	RAB6B	MGI:107283|Ensembl:ENSMUSG00000032549	9	protein-coding
85	ILMN_2900962	14545	Gdap1	ganglioside-induced differentiation-associated-protein 1	2	5.67724	54332	GDAP1	MGI:1338002|Ensembl:ENSMUSG00000025777|Vega:OTTMUSG00000022300	1	protein-coding
86	ILMN_1237378	20254	Scg2	secretogranin II	2	5.66959	7857	SCG2	MGI:103033|Ensembl:ENSMUSG00000050711	1	protein-coding
87	ILMN_1256063	381338	Lonrf2	LON peptidase N-terminal domain and ring finger 2	1	5.66814	164832	LONRF2	MGI:1920209|Ensembl:ENSMUSG00000048814|Vega:OTTMUSG00000026560	1	protein-coding
88	ILMN_2488599	242662	Rims3	regulating synaptic membrane exocytosis 3	3	5.64186	9783	RIMS3	MGI:2443331|Ensembl:ENSMUSG00000032890|Vega:OTTMUSG00000008857	4	protein-coding
89	ILMN_2738123	26913	Gprin1	G protein-regulated inducer of neurite outgrowth 1	1	5.64079	114787	GPRIN1	MGI:1349455|Ensembl:ENSMUSG00000069227|Vega:OTTMUSG00000032670	13	protein-coding
90	ILMN_2748897	23934	Ly6h	lymphocyte antigen 6 complex, locus H	2	5.63804	4062	LY6H	MGI:1346030|Ensembl:ENSMUSG00000022577|Vega:OTTMUSG00000033674	15	protein-coding
91	ILMN_1214188	13483	Dpp6	dipeptidylpeptidase 6	1	5.63278	1804	DPP6	MGI:94921|Ensembl:ENSMUSG00000061576|Vega:OTTMUSG00000029575	5	protein-coding
92	ILMN_1252636	75104	Mmd2	monocyte to macrophage differentiation-associated 2	4	5.62056	221938	MMD2	MGI:1922354|Ensembl:ENSMUSG00000039533	5	protein-coding
93	ILMN_3153010	75409	Slitrk5	SLIT and NTRK-like family, member 5	1	5.60955	26050	SLITRK5	MGI:2679448|Ensembl:ENSMUSG00000033214	14	protein-coding
94	ILMN_2608073	58243	Nap1l5	nucleosome assembly protein 1-like 5	2	5.59897	266812	NAP1L5	MGI:1923555|Ensembl:ENSMUSG00000055430	6	protein-coding
95	ILMN_1216675	11519	Add2	adducin 2 (beta)	1	5.58721	119	ADD2	MGI:87919|Ensembl:ENSMUSG00000030000	6	protein-coding
96	ILMN_2856986	20255	Scg3	secretogranin III	1	5.57262	29106	SCG3	MGI:103032|Ensembl:ENSMUSG00000032181	9	protein-coding
97	ILMN_2782402	17957	Napb	N-ethylmaleimide sensitive fusion protein attachment protein beta	1	5.57085	63908	NAPB	MGI:104562|Ensembl:ENSMUSG00000027438|Vega:OTTMUSG00000015716	2	protein-coding
98	ILMN_2510474	56191	Tro	trophinin	1	5.56357	7216	TRO	MGI:1928994|Ensembl:ENSMUSG00000025272|Vega:OTTMUSG00000019171	X	protein-coding
99	ILMN_2932508	170571	Cntnap4	contactin associated protein-like 4	1	5.56284	85445	CNTNAP4	MGI:2183572|Ensembl:ENSMUSG00000031772|Vega:OTTMUSG00000030975	8	protein-coding
100	ILMN_2513378	19059	Ppp3r2	protein phosphatase 3, regulatory subunit B, alpha isoform (calcineurin B, type II)	1	5.55931	5535	PPP3R2	MGI:107171|Ensembl:ENSMUSG00000028310|Vega:OTTMUSG00000006951	4	protein-coding
101	ILMN_2916437	225392	Rell2	RELT-like 2	1	5.55261	285613	RELL2	MGI:1918044|Ensembl:ENSMUSG00000044024|Vega:OTTMUSG00000036303	18	protein-coding
102	ILMN_3136149	72393	Faim2	Fas apoptotic inhibitory molecule 2	2	5.54876	23017	FAIM2	MGI:1919643|Ensembl:ENSMUSG00000023011	15	protein-coding
103	ILMN_3121717	15569	Elavl2	ELAV (embryonic lethal, abnormal vision, Drosophila)-like 2 (Hu antigen B)	1	5.54822	1993	ELAVL2	MGI:1100887|Ensembl:ENSMUSG00000008489|Vega:OTTMUSG00000007821	4	protein-coding
104	ILMN_2729826	20604	Sst	somatostatin	2	5.49692	6750	SST	MGI:98326|Ensembl:ENSMUSG00000004366	16	protein-coding
105	ILMN_2750035	18189	Nrxn1	neurexin I	0	5.48414	9378	NRXN1	MGI:1096391|Ensembl:ENSMUSG00000024109|Vega:OTTMUSG00000034567	17	protein-coding
106	ILMN_2622190	239157	Pnma2	paraneoplastic antigen MA2	0	5.47656	10687	PNMA2	MGI:2444129|Ensembl:ENSMUSG00000046204|Vega:OTTMUSG00000035206	14	protein-coding
107	ILMN_1234990	14432	Gap43	growth associated protein 43	0	5.46644	2596	GAP43	MGI:95639|Ensembl:ENSMUSG00000047261|Vega:OTTMUSG00000016275	16	protein-coding
108	ILMN_1227376	329178	Unc80	unc-80 homolog (C. elegans)	1	5.46213	285175	UNC80	MGI:2652882|Ensembl:ENSMUSG00000055567|Vega:OTTMUSG00000026091	1	protein-coding
109	ILMN_2812599	228777	Nrsn2	neurensin 2	1	5.45368	80023	NRSN2	MGI:2684969|Ensembl:ENSMUSG00000059361|Vega:OTTMUSG00000015839	2	protein-coding
110	ILMN_2644068	72661	Serp2	stress-associated endoplasmic reticulum protein family member 2	2	5.44187	387923	SERP2	MGI:1919911|Ensembl:ENSMUSG00000052584	14	protein-coding
111	ILMN_2926480	68203	Diras2	DIRAS family, GTP-binding RAS-like 2	2	5.43702	54769	DIRAS2	MGI:1915453|Ensembl:ENSMUSG00000047842	13	protein-coding
112	ILMN_1230224	72685	Dnajc6	DnaJ (Hsp40) homolog, subfamily C, member 6	4	5.4233	9829	DNAJC6	MGI:1919935|Ensembl:ENSMUSG00000028528|Vega:OTTMUSG00000008458	4	protein-coding
113	ILMN_2822825	230904	Fbxo2	F-box protein 2	2	5.4211	26232	FBXO2	MGI:2446216|Ensembl:ENSMUSG00000041556|Vega:OTTMUSG00000010936	4	protein-coding
114	ILMN_2451529	72821	Scn2b	sodium channel, voltage-gated, type II, beta	1	5.39162	6327	SCN2B	MGI:106921|Ensembl:ENSMUSG00000070304	9	protein-coding
115	ILMN_2710484	52822	Rufy3	RUN and FYVE domain containing 3	1	5.36637	22902	RUFY3	MGI:106484|Ensembl:ENSMUSG00000029291	5	protein-coding
116	ILMN_2753173	57754	Cend1	cell cycle exit and neuronal differentiation 1	1	5.34538	51286	CEND1	MGI:1929898|Ensembl:ENSMUSG00000060240|Vega:OTTMUSG00000034077	7	protein-coding
117	ILMN_1251416	20404	Sh3gl2	SH3-domain GRB2-like 2	3	5.34325	6456	SH3GL2	MGI:700009|Ensembl:ENSMUSG00000028488|Vega:OTTMUSG00000007959	4	protein-coding
118	ILMN_1218471	24050	Sept3	septin 3	2	5.3396	55964	SEPT3	MGI:1345148|Ensembl:ENSMUSG00000022456	15	protein-coding
119	ILMN_2654624	330941	AI593442	expressed sequence AI593442	2	5.31639	399947	C11orf87	MGI:2143099|Ensembl:ENSMUSG00000078307	9	protein-coding
120	ILMN_2933805	277468	Slc39a12	solute carrier family 39 (zinc transporter), member 12	2	5.31491	221074	SLC39A12	MGI:2139274|Ensembl:ENSMUSG00000036949|Vega:OTTMUSG00000011408	2	protein-coding
121	ILMN_2675677	245468	Pnma3	paraneoplastic antigen MA3	1	5.31161	29944	PNMA3	MGI:2180565|Ensembl:ENSMUSG00000046287|Vega:OTTMUSG00000017702	X	protein-coding
122	ILMN_1237237	73032	Ttc9b	tetratricopeptide repeat domain 9B	0	5.29367	148014	TTC9B	MGI:1920282|Ensembl:ENSMUSG00000007944|Vega:OTTMUSG00000023957	7	protein-coding
123	ILMN_2662264	76960	Bcas1	breast carcinoma amplified sequence 1	3	5.29035	8537	BCAS1	MGI:1924210|Ensembl:ENSMUSG00000013523|Vega:OTTMUSG00000016099	2	protein-coding
124	ILMN_2643495	235180	Fez1	fasciculation and elongation protein zeta 1 (zygin I)	2	5.28634	9638	FEZ1	MGI:2670976|Ensembl:ENSMUSG00000032118|Vega:OTTMUSG00000034186	9	protein-coding
125	ILMN_1252953	12404	Cbln1	cerebellin 1 precursor protein	1	5.28277	869	CBLN1	MGI:88281|Ensembl:ENSMUSG00000031654	8	protein-coding
126	ILMN_2696532	11803	Aplp1	amyloid beta (A4) precursor-like protein 1	0	5.2679	333	APLP1	MGI:88046|Ensembl:ENSMUSG00000006651	7	protein-coding
127	ILMN_1223724	269610	Chd5	chromodomain helicase DNA binding protein 5	3	5.25466	26038	CHD5	MGI:3036258|Ensembl:ENSMUSG00000005045|Vega:OTTMUSG00000010576	4	protein-coding
128	ILMN_1231724	19711	Resp18	regulated endocrine-specific protein 18	2	5.24781	389075	RESP18	MGI:1098222|Ensembl:ENSMUSG00000033061|Vega:OTTMUSG00000024507	1	protein-coding
129	ILMN_2890515	18197	Nsg2	neuron specific gene family member 2	2	5.24547	51617	HMP19	MGI:1202070|Ensembl:ENSMUSG00000020297|Vega:OTTMUSG00000005366	11	protein-coding
130	ILMN_1231837	211712	Pcdh9	protocadherin 9	1	5.24346	5101	PCDH9	MGI:1306801|Ensembl:ENSMUSG00000055421	14	protein-coding
131	ILMN_2824889	226115	Opalin	oligodendrocytic myelin paranodal and inner loop protein	0	5.2395	93377	OPALIN	MGI:2657025|Ensembl:ENSMUSG00000050121	19	protein-coding
132	ILMN_1215972	20965	Syn2	synapsin II	1	5.2356	6854	SYN2	MGI:103020|Ensembl:ENSMUSG00000009394	6	protein-coding
133	ILMN_2630772	331532	Tceal5	transcription elongation factor A (SII)-like 5	2	5.22639	340543	TCEAL5	MGI:3036236|Ensembl:ENSMUSG00000054034|Vega:OTTMUSG00000018780	X	protein-coding
134	ILMN_1217517	13175	Dclk1	doublecortin-like kinase 1	2	5.22546	9201	DCLK1	MGI:1330861|Ensembl:ENSMUSG00000027797	3	protein-coding
135	ILMN_3162247	72898	Asphd2	aspartate beta-hydroxylase domain containing 2	2	5.19745	57168	ASPHD2	MGI:1920148|Ensembl:ENSMUSG00000029348	5	protein-coding
136	ILMN_1256309	233271	Luzp2	leucine zipper protein 2	0	5.18622	338645	LUZP2	MGI:1889615|Ensembl:ENSMUSG00000063297	7	protein-coding
137	ILMN_3015003	18190	Nrxn2	neurexin II	1	5.18326	9379	NRXN2	MGI:1096362|Ensembl:ENSMUSG00000033768|Vega:OTTMUSG00000018624	19	protein-coding
138	ILMN_1231274	67272	Cmtm5	CKLF-like MARVEL transmembrane domain containing 5	1	5.14627	116173	CMTM5	MGI:2447164|Ensembl:ENSMUSG00000040759	14	protein-coding
139	ILMN_1252349	76161	6330527O06Rik	RIKEN cDNA 6330527O06 gene	1	5.13286	24141	LAMP5	MGI:1923411|Ensembl:ENSMUSG00000027270|Vega:OTTMUSG00000015982	2	protein-coding
140	ILMN_2604070	107934	Celsr3	cadherin, EGF LAG seven-pass G-type receptor 3 (flamingo homolog, Drosophila)	2	5.13165	1951	CELSR3	MGI:1858236|Ensembl:ENSMUSG00000023473	9	protein-coding
141	ILMN_3137552	17756	Mtap2	microtubule-associated protein 2	2	5.12434	6622	SNCA	MGI:97175|Ensembl:ENSMUSG00000015222|Vega:OTTMUSG00000016448	1	protein-coding
142	ILMN_1243357	14167	Fgf12	fibroblast growth factor 12	3	5.12132	2257	FGF12	MGI:109183|Ensembl:ENSMUSG00000022523	16	protein-coding
143	ILMN_2728682	320111	Prr18	proline rich region 18	2	5.12083	285800	PRR18	MGI:2443403|Ensembl:ENSMUSG00000055945	17	protein-coding
144	ILMN_2672624	15166	Hcn2	hyperpolarization-activated, cyclic nucleotide-gated K+ 2	1	5.11404	610	HCN2	MGI:1298210|Ensembl:ENSMUSG00000020331|Vega:OTTMUSG00000027869	10	protein-coding
145	ILMN_1237338	30959	Ddx25	DEAD (Asp-Glu-Ala-Asp) box polypeptide 25	2	5.11309	29118	DDX25	MGI:1353582|Ensembl:ENSMUSG00000032101	9	protein-coding
146	ILMN_1236009	12323	Camk2b	calcium/calmodulin-dependent protein kinase II, beta	3	5.1046	816	CAMK2B	MGI:88257|Ensembl:ENSMUSG00000057897|Vega:OTTMUSG00000005105	11	protein-coding
147	ILMN_2925923	381677	Vgf	VGF nerve growth factor inducible	1	5.10305	7425	VGF	MGI:1343180|Ensembl:ENSMUSG00000037428	5	protein-coding
148	ILMN_1233402	229521	Syt11	synaptotagmin XI	2	5.09989	23208	SYT11	MGI:1859547|Ensembl:ENSMUSG00000068923|Vega:OTTMUSG00000022625	3	protein-coding
149	ILMN_2805839	56747	Sez6l	seizure related 6 homolog like	1	5.08506	23544	SEZ6L	MGI:1935121|Ensembl:ENSMUSG00000058153	5	protein-coding
150	ILMN_2714589	64176	Sv2b	synaptic vesicle glycoprotein 2 b	2	5.07922	9899	SV2B	MGI:1927338|Ensembl:ENSMUSG00000053025	7	protein-coding
151	ILMN_1228470	57028	Pdxp	pyridoxal (pyridoxine, vitamin B6) phosphatase	2	5.07202	57026	PDXP	MGI:1919282|Ensembl:ENSMUSG00000068221	15	protein-coding
152	ILMN_2991930	72902	Spock3	sparc/osteonectin, cwcv and kazal-like domains proteoglycan 3	2	5.06936	50859	SPOCK3	MGI:1920152|Ensembl:ENSMUSG00000054162|Vega:OTTMUSG00000031630	8	protein-coding
153	ILMN_2594139	103712	6330403K07Rik	RIKEN cDNA 6330403K07 gene	2	5.06783	728392	LOC728392	MGI:1918001	11	protein-coding
154	ILMN_1217442	216049	Zfp365	zinc finger protein 365	1	5.06622	22891	ZNF365	MGI:2143676|Ensembl:ENSMUSG00000037855|Vega:OTTMUSG00000027948	10	protein-coding
155	ILMN_2679377	12653	Chgb	chromogranin B	4	5.0662	1114	CHGB	MGI:88395|Ensembl:ENSMUSG00000027350|Vega:OTTMUSG00000015662	2	protein-coding
156	ILMN_2421411	329942	Csmd2	CUB and Sushi multiple domains 2	1	5.05634	114784	CSMD2	MGI:2386401	4	protein-coding
157	ILMN_2764344	320705	Bend6	BEN domain containing 6	1	5.05398	221336	BEND6	MGI:2444572|Ensembl:ENSMUSG00000042182|Vega:OTTMUSG00000021502	1	protein-coding
158	ILMN_2671411	16593	Klc1	kinesin light chain 1	1	5.05242	3831	KLC1	MGI:107978|Ensembl:ENSMUSG00000021288|Vega:OTTMUSG00000027507	12	protein-coding
159	ILMN_1254628	103978	Gpc5	glypican 5	0	5.05204	2262	GPC5	MGI:1194894|Ensembl:ENSMUSG00000022112	14	protein-coding
160	ILMN_1229256	207777	Bzrap1	benzodiazepine receptor associated protein 1	2	5.04993	9256	BZRAP1	MGI:2450877|Ensembl:ENSMUSG00000034156|Vega:OTTMUSG00000001438	11	protein-coding
161	ILMN_2662054	170638	Hpcal4	hippocalcin-like 4	1	5.03066	51440	HPCAL4	MGI:2157521|Ensembl:ENSMUSG00000046093|Vega:OTTMUSG00000008935	4	protein-coding
162	ILMN_2742197	14400	Gabrb1	gamma-aminobutyric acid (GABA) A receptor, subunit beta 1	1	5.01629	2560	GABRB1	MGI:95619|Ensembl:ENSMUSG00000029212|Vega:OTTMUSG00000024372	5	protein-coding
163	ILMN_2620545	171469	Gpr37l1	G protein-coupled receptor 37-like 1	1	5.01325	9283	GPR37L1	MGI:1928503|Ensembl:ENSMUSG00000026424|Vega:OTTMUSG00000022102	1	protein-coding
164	ILMN_3113303	11941	Atp2b2	ATPase, Ca++ transporting, plasma membrane 2	1	5.01245	491	ATP2B2	MGI:105368|Ensembl:ENSMUSG00000030302|Vega:OTTMUSG00000018967	6	protein-coding
165	ILMN_2730909	245607	Gprasp2	G protein-coupled receptor associated sorting protein 2	3	5.01093	114928	GPRASP2	MGI:2442071|Ensembl:ENSMUSG00000072966|Vega:OTTMUSG00000018752	X	protein-coding
166	ILMN_2733314	52882	Rgs7bp	regulator of G-protein signalling 7 binding protein	2	5.00743	401190	RGS7BP	MGI:106334|Ensembl:ENSMUSG00000021719	13	protein-coding
167	ILMN_1253093	83767	Wasf1	WASP family 1	3	5.00534	8936	WASF1	MGI:1890563|Ensembl:ENSMUSG00000019831|Vega:OTTMUSG00000020871	10	protein-coding
168	ILMN_3090378	18163	Ctnnd2	catenin (cadherin associated protein), delta 2	1	4.9999	1501	CTNND2	MGI:1195966|Ensembl:ENSMUSG00000022240	15	protein-coding
169	ILMN_2841307	77629	Sphkap	SPHK1 interactor, AKAP domain containing	4	4.99762	80309	SPHKAP	MGI:1924879|Ensembl:ENSMUSG00000026163|Vega:OTTMUSG00000030288	1	protein-coding
170	ILMN_2839027	66104	Tceal6	transcription elongation factor A (SII)-like 6	2	4.9843	85012	TCEAL3	MGI:1923939|Ensembl:ENSMUSG00000031409|Vega:OTTMUSG00000018755	X	protein-coding
171	ILMN_1241161	73047	Camk2n2	calcium/calmodulin-dependent protein kinase II inhibitor 2	2	4.97301	94032	CAMK2N2	MGI:1920297|Ensembl:ENSMUSG00000051146|Vega:OTTMUSG00000028771	16	protein-coding
172	ILMN_1212907	241520	Fam171b	family with sequence similarity 171, member B	2	4.96952	165215	FAM171B	MGI:2444579|Ensembl:ENSMUSG00000048388|Vega:OTTMUSG00000013394	2	protein-coding
173	ILMN_2827217	232370	Clstn3	calsyntenin 3	4	4.96742	9746	CLSTN3	MGI:2178323|Ensembl:ENSMUSG00000008153|Vega:OTTMUSG00000022801	6	protein-coding
174	ILMN_2977871	319642	Rab9b	RAB9B, member RAS oncogene family	2	4.96687	51209	RAB9B	MGI:2442454|Ensembl:ENSMUSG00000043463|Vega:OTTMUSG00000018802	X	protein-coding
175	ILMN_2486818	54126	Arhgef7	Rho guanine nucleotide exchange factor (GEF7)	1	4.95761	8874	ARHGEF7	MGI:1860493|Ensembl:ENSMUSG00000031511|Vega:OTTMUSG00000021108	8	protein-coding
176	ILMN_2751854	234593	Ndrg4	N-myc downstream regulated gene 4	1	4.93292	65009	NDRG4	MGI:2384590|Ensembl:ENSMUSG00000036564|Vega:OTTMUSG00000027408	8	protein-coding
177	ILMN_2741277	84704	Snurf	SNRPN upstream reading frame	2	4.92652	8926	SNURF	MGI:1891236	7	protein-coding
178	ILMN_1234340	241727	Snph	syntaphilin	1	4.92499	9751	SNPH	MGI:2139270|Ensembl:ENSMUSG00000027457|Vega:OTTMUSG00000014818	2	protein-coding
179	ILMN_3009184	11775	Ap3b2	adaptor-related protein complex 3, beta 2 subunit	2	4.90791	8120	AP3B2	MGI:1100869|Ensembl:ENSMUSG00000062444|Vega:OTTMUSG00000031672	7	protein-coding
180	ILMN_2644632	20910	Stxbp1	syntaxin binding protein 1	1	4.90394	6812	STXBP1	MGI:107363|Ensembl:ENSMUSG00000026797|Vega:OTTMUSG00000012527	2	protein-coding
181	ILMN_1231762	268932	Caskin1	CASK interacting protein 1	3	4.89142	57524	CASKIN1	MGI:2442952|Ensembl:ENSMUSG00000033597	17	protein-coding
182	ILMN_2658198	52389	Gpr123	G protein-coupled receptor 123	2	4.88762	84435	GPR123	MGI:1277167|Ensembl:ENSMUSG00000025475|Vega:OTTMUSG00000023085	7	protein-coding
183	ILMN_2763404	18191	Nrxn3	neurexin III	1	4.88057	116508	Nrxn3	MGI:1096389|Ensembl:ENSMUSG00000066392|Vega:OTTMUSG00000035299	12	protein-coding
184	ILMN_1257625	19283	Ptprz1	protein tyrosine phosphatase, receptor type Z, polypeptide 1	0	4.87592	5803	PTPRZ1	MGI:97816|Ensembl:ENSMUSG00000068748	6	protein-coding
185	ILMN_1249809	56533	Rgs17	regulator of G-protein signaling 17	0	4.8756	26575	RGS17	MGI:1927469|Ensembl:ENSMUSG00000019775|Vega:OTTMUSG00000027502	10	protein-coding
186	ILMN_1250379	116731	Pcdha1	protocadherin alpha 1	2	4.86948	56147	PCDHA1	MGI:2150982|Ensembl:ENSMUSG00000007440	18	protein-coding
187	ILMN_1219014	71691	Pnmal1	PNMA-like 1	2	4.86552	55228	PNMAL1	MGI:1918941|Ensembl:ENSMUSG00000041141	7	protein-coding
188	ILMN_1231405	26562	Ncdn	neurochondrin	0	4.8369	23154	NCDN	MGI:1347351|Ensembl:ENSMUSG00000028833|Vega:OTTMUSG00000009274	4	protein-coding
189	ILMN_2653194	214931	Fbxl16	F-box and leucine-rich repeat protein 16	1	4.83667	146330	FBXL16	MGI:2448488|Ensembl:ENSMUSG00000025738	17	protein-coding
190	ILMN_2622817	16536	Kcnq2	potassium voltage-gated channel, subfamily Q, member 2	1	4.83358	3785	KCNQ2	MGI:1309503|Ensembl:ENSMUSG00000016346|Vega:OTTMUSG00000016558	2	protein-coding
191	ILMN_3123491	12298	Cacnb4	calcium channel, voltage-dependent, beta 4 subunit	1	4.83094	785	CACNB4	MGI:103301|Ensembl:ENSMUSG00000017412|Vega:OTTMUSG00000012607	2	protein-coding
192	ILMN_2869623	76156	Fam131b	family with sequence similarity 131, member B	1	4.82694	9715	FAM131B	MGI:1923406|Ensembl:ENSMUSG00000029861|Vega:OTTMUSG00000033751	6	protein-coding
193	ILMN_2594325	72605	Car10	carbonic anhydrase 10	1	4.8201	56934	CA10	MGI:1919855|Ensembl:ENSMUSG00000056158|Vega:OTTMUSG00000001341	11	protein-coding
194	ILMN_2696182	83766	Actl6b	actin-like 6B	1	4.81957	51412	ACTL6B	MGI:1933548|Ensembl:ENSMUSG00000029712|Vega:OTTMUSG00000021924	5	protein-coding
195	ILMN_2755026	14406	Gabrg2	gamma-aminobutyric acid (GABA) A receptor, subunit gamma 2	1	4.8119	2566	GABRG2	MGI:95623|Ensembl:ENSMUSG00000020436|Vega:OTTMUSG00000006345	11	protein-coding
196	ILMN_1225261	22223	Uchl1	ubiquitin carboxy-terminal hydrolase L1	5	4.8106	7345	UCHL1	MGI:103149|Ensembl:ENSMUSG00000029223	5	protein-coding
197	ILMN_1255211	211232	Cpne9	copine family member IX	2	4.81004	151835	CPNE9	MGI:2443052|Ensembl:ENSMUSG00000030270|Vega:OTTMUSG00000022223	6	protein-coding
198	ILMN_2670486	12032	Bcan	brevican	1	4.80727	63827	BCAN	MGI:1096385|Ensembl:ENSMUSG00000004892	3	protein-coding
199	ILMN_2664455	30052	Pcsk1n	proprotein convertase subtilisin/kexin type 1 inhibitor	2	4.80573	27344	PCSK1N	MGI:1353431|Ensembl:ENSMUSG00000039278|Vega:OTTMUSG00000018013	X	protein-coding
200	ILMN_3119914	69539	Trnp1	TMF1-regulated nuclear protein 1	3	4.80103	388610	TRNP1	MGI:1916789|Ensembl:ENSMUSG00000056596|Vega:OTTMUSG00000011157	4	protein-coding
201	ILMN_2524087	110876	Scn2a1	sodium channel, voltage-gated, type II, alpha 1	0	4.78512	6326	SCN2A	MGI:98248|Ensembl:ENSMUSG00000075318|Vega:OTTMUSG00000012963	2	protein-coding
202	ILMN_2592150	66797	Cntnap2	contactin associated protein-like 2	2	4.77885	26047	CNTNAP2	MGI:1914047|Ensembl:ENSMUSG00000039419|Vega:OTTMUSG00000022414	6	protein-coding
203	ILMN_2858666	20420	Shd	src homology 2 domain-containing transforming protein D	2	4.77789	56961	SHD	MGI:1099461|Ensembl:ENSMUSG00000039154	17	protein-coding
204	ILMN_2666205	269109	Dpp10	dipeptidylpeptidase 10	0	4.77664	57628	DPP10	MGI:2442409|Ensembl:ENSMUSG00000036815|Vega:OTTMUSG00000020794	1	protein-coding
205	ILMN_1241371	56177	Olfm1	olfactomedin 1	3	4.77302	10439	OLFM1	MGI:1860437|Ensembl:ENSMUSG00000026833|Vega:OTTMUSG00000011625	2	protein-coding
206	ILMN_2678366	74002	Psd2	pleckstrin and Sec7 domain containing 2	1	4.76212	84249	PSD2	MGI:1921252|Ensembl:ENSMUSG00000024347	18	protein-coding
207	ILMN_2722864	17967	Ncam1	neural cell adhesion molecule 1	2	4.76163	4684	NCAM1	MGI:97281|Ensembl:ENSMUSG00000039542	9	protein-coding
208	ILMN_2487003	209966	Pgbd5	piggyBac transposable element derived 5	4	4.76083	79605	PGBD5	MGI:2429955|Ensembl:ENSMUSG00000050751|Vega:OTTMUSG00000027609	8	protein-coding
209	ILMN_2455304	12326	Camk4	calcium/calmodulin-dependent protein kinase IV	2	4.75101	814	CAMK4	MGI:88258|Ensembl:ENSMUSG00000038128	18	protein-coding
210	ILMN_2842843	218038	Amph	amphiphysin	2	4.75082	273	AMPH	MGI:103574|Ensembl:ENSMUSG00000021314	13	protein-coding
211	ILMN_2596385	16494	Kcna6	potassium voltage-gated channel, shaker-related, subfamily, member 6	3	4.75049	3742	KCNA6	MGI:96663|Ensembl:ENSMUSG00000038077|Vega:OTTMUSG00000022444	6	protein-coding
212	ILMN_1231336	16426	Itih3	inter-alpha trypsin inhibitor, heavy chain 3	1	4.73897	3699	ITIH3	MGI:96620|Ensembl:ENSMUSG00000006522|Vega:OTTMUSG00000035523	14	protein-coding
213	ILMN_1233444	225583	A730017C20Rik	RIKEN cDNA A730017C20 gene	5	4.7115	100127206	KIAA1024L	MGI:2442934|Ensembl:ENSMUSG00000050875	18	protein-coding
214	ILMN_2724785	16498	Kcnab2	potassium voltage-gated channel, shaker-related subfamily, beta member 2	4	4.70713	8514	KCNAB2	MGI:109239|Ensembl:ENSMUSG00000028931|Vega:OTTMUSG00000033817	4	protein-coding
215	ILMN_2994995	213469	Lgi3	leucine-rich repeat LGI family, member 3	3	4.69746	203190	LGI3	MGI:2182619|Ensembl:ENSMUSG00000033595	14	protein-coding
216	ILMN_2746664	59049	Slc22a17	solute carrier family 22 (organic cation transporter), member 17	2	4.69123	51310	SLC22A17	MGI:1926225|Ensembl:ENSMUSG00000022199	14	protein-coding
217	ILMN_1233535	67412	6330407J23Rik	RIKEN cDNA 6330407J23 gene	1	4.68841	387104	C6orf174	MGI:1914662|Ensembl:ENSMUSG00000038916	10	protein-coding
218	ILMN_2589915	330790	Hapln4	hyaluronan and proteoglycan link protein 4	1	4.66746	404037	HAPLN4	MGI:2679531|Ensembl:ENSMUSG00000007594	8	protein-coding
219	ILMN_2734160	229706	Slc6a17	solute carrier family 6 (neurotransmitter transporter), member 17	2	4.6643	388662	SLC6A17	MGI:2442535|Ensembl:ENSMUSG00000027894|Vega:OTTMUSG00000036634	3	protein-coding
220	ILMN_1238436	12890	Cplx2	complexin 2	1	4.66225	10814	CPLX2	MGI:104726|Ensembl:ENSMUSG00000025867|Vega:OTTMUSG00000032656	13	protein-coding
221	ILMN_1239134	72585	Lypd1	Ly6/Plaur domain containing 1	1	4.65121	116372	LYPD1	MGI:1919835|Ensembl:ENSMUSG00000026344|Vega:OTTMUSG00000030265	1	protein-coding
222	ILMN_2502275	269642	Nat8l	N-acetyltransferase 8-like	0	4.63629	339983	NAT8L	MGI:2447776|Ensembl:ENSMUSG00000048142	5	protein-coding
223	ILMN_1245118	170711	Otud7a	OTU domain containing 7A	3	4.63261	161725	OTUD7A	MGI:2158505|Ensembl:ENSMUSG00000033510|Vega:OTTMUSG00000027290	7	protein-coding
224	ILMN_3114546	50876	Tmod2	tropomodulin 2	3	4.6307	29767	TMOD2	MGI:1355335|Ensembl:ENSMUSG00000032186	9	protein-coding
225	ILMN_2472606	56710	Dbc1	deleted in bladder cancer 1 (human)	1	4.61996	1620	DBC1	MGI:1928478|Ensembl:ENSMUSG00000028351|Vega:OTTMUSG00000000310	4	protein-coding
226	ILMN_2659896	18231	Nxph1	neurexophilin 1	1	4.61726	30010	NXPH1	MGI:107492|Ensembl:ENSMUSG00000046178|Vega:OTTMUSG00000034245	6	protein-coding
227	ILMN_1247084	108073	Grm7	glutamate receptor, metabotropic 7	1	4.61329	2917	GRM7	MGI:1351344|Ensembl:ENSMUSG00000056755|Vega:OTTMUSG00000037574	6	protein-coding
228	ILMN_3125814	216739	Acsl6	acyl-CoA synthetase long-chain family member 6	4	4.60696	23305	ACSL6	MGI:894291|Ensembl:ENSMUSG00000020333|Vega:OTTMUSG00000005668	11	protein-coding
229	ILMN_2442740	217480	Dgkb	diacylglycerol kinase, beta	0	4.59575	1607	DGKB	MGI:2442474|Ensembl:ENSMUSG00000036095	12	protein-coding
230	ILMN_1235354	19085	Prkar1b	protein kinase, cAMP dependent regulatory, type I beta	1	4.55414	5575	PRKAR1B	MGI:97759|Ensembl:ENSMUSG00000025855|Vega:OTTMUSG00000025121	5	protein-coding
231	ILMN_3136638	20617	Snca	synuclein, alpha	5	4.55099	6622	SNCA	MGI:1277151|Ensembl:ENSMUSG00000025889	6	protein-coding
232	ILMN_2681195	235106	Ntm	neurotrimin	2	4.54776	50863	NTM	MGI:2446259|Ensembl:ENSMUSG00000059974|Vega:OTTMUSG00000023155	9	protein-coding
233	ILMN_2703948	57340	Jph3	junctophilin 3	0	4.53455	57338	JPH3	MGI:1891497|Ensembl:ENSMUSG00000025318|Vega:OTTMUSG00000036743	8	protein-coding
234	ILMN_1260082	233879	Asphd1	aspartate beta-hydroxylase domain containing 1	1	4.52641	253982	ASPHD1	MGI:2685014|Ensembl:ENSMUSG00000046378|Vega:OTTMUSG00000023163	7	protein-coding
235	ILMN_2648098	14270	Srgap2	SLIT-ROBO Rho GTPase activating protein 2	1	4.5254	23380	SRGAP2	MGI:109605|Ensembl:ENSMUSG00000026425	1	protein-coding
236	ILMN_2672943	21367	Cntn2	contactin 2	0	4.52258	6900	CNTN2	MGI:104518|Ensembl:ENSMUSG00000053024	1	protein-coding
237	ILMN_1221852	269695	Rnft2	ring finger protein, transmembrane 2	3	4.51739	84900	RNFT2	MGI:2442859|Ensembl:ENSMUSG00000032850|Vega:OTTMUSG00000028972	5	protein-coding
238	ILMN_2909336	234267	Gpm6a	glycoprotein m6a	3	4.51697	2823	GPM6A	MGI:107671|Ensembl:ENSMUSG00000031517	8	protein-coding
239	ILMN_2768972	268709	Fam107a	family with sequence similarity 107, member A	3	4.51617	11170	FAM107A	MGI:3041256|Ensembl:ENSMUSG00000021750|Vega:OTTMUSG00000027765	14	protein-coding
240	ILMN_1241332	320772	Mdga2	MAM domain containing glycosylphosphatidylinositol anchor 2	2	4.5093	161357	MDGA2	MGI:2444706|Ensembl:ENSMUSG00000034912	12	protein-coding
241	ILMN_2480963	17391	Mmp24	matrix metallopeptidase 24	1	4.50672	10893	MMP24	MGI:1341867|Ensembl:ENSMUSG00000027612|Vega:OTTMUSG00000016131	2	protein-coding
242	ILMN_2625913	211739	Vstm2a	V-set and transmembrane domain containing 2A	1	4.48377	222008	VSTM2A	MGI:2384826|Ensembl:ENSMUSG00000048834|Vega:OTTMUSG00000005182	11	protein-coding
243	ILMN_1221160	208898	Unc13c	unc-13 homolog C (C. elegans)	2	4.48131	440279	UNC13C	MGI:2149021|Ensembl:ENSMUSG00000062151	9	protein-coding
244	ILMN_1244829	15114	Hap1	huntingtin-associated protein 1	5	4.48037	9001	HAP1	MGI:1261831|Ensembl:ENSMUSG00000006930|Vega:OTTMUSG00000006280	11	protein-coding
245	ILMN_1237219	24012	Rgs7	regulator of G protein signaling 7	3	4.47486	6000	RGS7	MGI:1346089|Ensembl:ENSMUSG00000026527	1	protein-coding
246	ILMN_2813712	52906	Ahi1	Abelson helper integration site 1	4	4.47023	54806	AHI1	MGI:87971|Ensembl:ENSMUSG00000019986	10	protein-coding
247	ILMN_2811861	233878	Sez6l2	seizure related 6 homolog like 2	2	4.46805	26470	SEZ6L2	MGI:2385295|Ensembl:ENSMUSG00000030683|Vega:OTTMUSG00000023164	7	protein-coding
248	ILMN_1236725	14559	Gdf1	growth differentiation factor 1	5	4.46482	2657	GDF1	MGI:95683|Ensembl:ENSMUSG00000055694	8	protein-coding
249	ILMN_1214060	330485	Tmem145	transmembrane protein 145	1	4.45991	284339	TMEM145	MGI:3607779|Ensembl:ENSMUSG00000043843|Vega:OTTMUSG00000031920	7	protein-coding
250	ILMN_1255126	54418	Fmn2	formin 2	1	4.45905	56776	FMN2	MGI:1859252|Ensembl:ENSMUSG00000028354	1	protein-coding
251	ILMN_2776095	106763	Ttbk1	tau tubulin kinase 1	3	4.43734	84630	TTBK1	MGI:2147036|Ensembl:ENSMUSG00000015599	17	protein-coding
252	ILMN_1233523	116837	Rims1	regulating synaptic membrane exocytosis 1	4	4.4345	84556	Rims1	MGI:2152971|Ensembl:ENSMUSG00000041670	1	protein-coding
253	ILMN_2743902	17179	Matk	megakaryocyte-associated tyrosine kinase	3	4.43008	4145	MATK	MGI:99259|Ensembl:ENSMUSG00000004933|Vega:OTTMUSG00000030346	10	protein-coding
254	ILMN_2732430	67792	Rgs8	regulator of G-protein signaling 8	1	4.42568	85397	RGS8	MGI:108408|Ensembl:ENSMUSG00000042671|Vega:OTTMUSG00000021608	1	protein-coding
255	ILMN_2923671	245670	Rragb	Ras-related GTP binding B	2	4.4224	10325	RRAGB	MGI:3038613|Ensembl:ENSMUSG00000041658|Vega:OTTMUSG00000019332	X	protein-coding
256	ILMN_2836494	226180	Ina	internexin neuronal intermediate filament protein, alpha	1	4.42014	9118	INA	MGI:96568|Ensembl:ENSMUSG00000034336|Vega:OTTMUSG00000016340	19	protein-coding
257	ILMN_2598374	215707	Ccdc92	coiled-coil domain containing 92	3	4.40914	80212	CCDC92	MGI:106485|Ensembl:ENSMUSG00000037979|Vega:OTTMUSG00000024484	5	protein-coding
258	ILMN_2751735	78283	Mtap7d2	MAP7 domain containing 2	3	4.40672	256714	MAP7D2	MGI:1917474|Ensembl:ENSMUSG00000041020|Vega:OTTMUSG00000019440	X	protein-coding
259	ILMN_2645133	104885	Tmem179	transmembrane protein 179	2	4.39228	388021	TMEM179	MGI:2144891|Ensembl:ENSMUSG00000054013	12	protein-coding
260	ILMN_3131846	215090	Maneal	mannosidase, endo-alpha-like	1	4.38886	149175	MANEAL	MGI:2684896|Ensembl:ENSMUSG00000042763|Vega:OTTMUSG00000009200	4	protein-coding
261	ILMN_2643241	11419	Accn2	amiloride-sensitive cation channel 2, neuronal	1	4.38566	41	ACCN2	MGI:1194915|Ensembl:ENSMUSG00000023017	15	protein-coding
262	ILMN_3142097	56527	Mast1	microtubule associated serine/threonine kinase 1	1	4.38394	22983	MAST1	MGI:1861901|Ensembl:ENSMUSG00000053693|Vega:OTTMUSG00000029992	8	protein-coding
263	ILMN_1260389	22342	Lin7b	lin-7 homolog B (C. elegans)	2	4.37869	64130	LIN7B	MGI:1330858|Ensembl:ENSMUSG00000003872|Vega:OTTMUSG00000016518	7	protein-coding
264	ILMN_1259536	17441	Mog	myelin oligodendrocyte glycoprotein	0	4.37663	4340	MOG	MGI:97435|Ensembl:ENSMUSG00000076439|Vega:OTTMUSG00000014932	17	protein-coding
265	ILMN_3048728	216439	Agap2	ArfGAP with GTPase domain, ankyrin repeat and PH domain 2	1	4.37095	116986	AGAP2	MGI:3580016|Ensembl:ENSMUSG00000025422	10	protein-coding
266	ILMN_1252990	12424	Cck	cholecystokinin	4	4.36177	885	CCK	MGI:88297|Ensembl:ENSMUSG00000032532	9	protein-coding
267	ILMN_2611295	66959	Dusp26	dual specificity phosphatase 26 (putative)	5	4.36048	78986	DUSP26	MGI:1914209|Ensembl:ENSMUSG00000039661|Vega:OTTMUSG00000027144	8	protein-coding
268	ILMN_2879195	194237	Rimkla	ribosomal modification protein rimK-like family member A	3	4.36018	284716	RIMKLA	MGI:3040686|Ensembl:ENSMUSG00000048899|Vega:OTTMUSG00000009424	4	protein-coding
269	ILMN_2762701	20265	Scn1a	sodium channel, voltage-gated, type I, alpha	1	4.3596	6323	SCN1A	MGI:98246|Ensembl:ENSMUSG00000064329|Vega:OTTMUSG00000013102	2	protein-coding
270	ILMN_3130719	319613	Sybu	syntabulin (syntaxin-interacting)	3	4.35474	55638	SYBU	MGI:2442392|Ensembl:ENSMUSG00000022340	15	protein-coding
271	ILMN_2702374	320472	Ppm1e	protein phosphatase 1E (PP2C domain containing)	5	4.34627	22843	PPM1E	MGI:2444096|Ensembl:ENSMUSG00000046442|Vega:OTTMUSG00000001239	11	protein-coding
272	ILMN_1227650	12386	Ctnna2	catenin (cadherin associated protein), alpha 2	2	4.34183	1496	CTNNA2	MGI:88275|Ensembl:ENSMUSG00000063063|Vega:OTTMUSG00000034530	6	protein-coding
273	ILMN_1224770	67298	Gprasp1	G protein-coupled receptor associated sorting protein 1	3	4.33219	9737	GPRASP1	MGI:1917418|Ensembl:ENSMUSG00000043384|Vega:OTTMUSG00000018754	X	protein-coding
274	ILMN_2933022	27276	Plekhb1	pleckstrin homology domain containing, family B (evectins) member 1	4	4.33118	58473	PLEKHB1	MGI:1351469|Ensembl:ENSMUSG00000030701|Vega:OTTMUSG00000025179	7	protein-coding
275	ILMN_2695158	16581	Kifc2	kinesin family member C2	1	4.33081	90990	KIFC2	MGI:109187|Ensembl:ENSMUSG00000004187	15	protein-coding
276	ILMN_2448213	20541	Slc8a1	solute carrier family 8 (sodium/calcium exchanger), member 1	4	4.33016	6546	SLC8A1	MGI:107956|Ensembl:ENSMUSG00000054640	17	protein-coding
277	ILMN_2547237	14812	Grin2b	glutamate receptor, ionotropic, NMDA2B (epsilon 2)	2	4.32624	2904	GRIN2B	MGI:95821|Ensembl:ENSMUSG00000030209|Vega:OTTMUSG00000016356	6	protein-coding
278	ILMN_2938820	18040	Nefm	neurofilament, medium polypeptide	1	4.32508	4741	NEFM	MGI:97314|Ensembl:ENSMUSG00000022054|Vega:OTTMUSG00000016378	14	protein-coding
279	ILMN_3076439	20511	Slc1a2	solute carrier family 1 (glial high affinity glutamate transporter), member 2	2	4.31953	6506	SLC1A2	MGI:101931|Ensembl:ENSMUSG00000005089|Vega:OTTMUSG00000014848	2	protein-coding
280	ILMN_1248316	19215	Ptgds	prostaglandin D2 synthase (brain)	4	4.31314	5730	PTGDS	MGI:99261|Ensembl:ENSMUSG00000015090|Vega:OTTMUSG00000012118	2	protein-coding
281	ILMN_2915671	16497	Kcnab1	potassium voltage-gated channel, shaker-related subfamily, beta member 1	3	4.31005	7881	KCNAB1	MGI:109155|Ensembl:ENSMUSG00000027827|Vega:OTTMUSG00000034877	3	protein-coding
282	ILMN_2691478	12426	Cckbr	cholecystokinin B receptor	1	4.30977	887	CCKBR	MGI:99479|Ensembl:ENSMUSG00000030898	7	protein-coding
283	ILMN_2564506	20273	Scn8a	sodium channel, voltage-gated, type VIII, alpha	1	4.30713	6334	SCN8A	MGI:103169|Ensembl:ENSMUSG00000023033	15	protein-coding
284	ILMN_2737867	17755	Mtap1b	microtubule-associated protein 1B	5	4.29946	4131	MAP1B	MGI:1306778|Ensembl:ENSMUSG00000052727	13	protein-coding
285	ILMN_2491186	22771	Zic1	zinc finger protein of the cerebellum 1	3	4.29714	7545	ZIC1	MGI:106683|Ensembl:ENSMUSG00000032368|Vega:OTTMUSG00000020412	9	protein-coding
286	ILMN_2813724	230775	Bai2	brain-specific angiogenesis inhibitor 2	2	4.29535	576	BAI2	MGI:2451244|Ensembl:ENSMUSG00000028782|Vega:OTTMUSG00000009519	4	protein-coding
287	ILMN_3161828	19337	Rab33a	RAB33A, member of RAS oncogene family	4	4.2891	9363	RAB33A	MGI:109493|Ensembl:ENSMUSG00000031104|Vega:OTTMUSG00000017541	X	protein-coding
288	ILMN_2433119	54525	Syt7	synaptotagmin VII	3	4.28374	9066	SYT7	MGI:1859545|Ensembl:ENSMUSG00000024743	19	protein-coding
289	ILMN_2644350	21838	Thy1	thymus cell antigen 1, theta	5	4.27768	7070	THY1	MGI:98747|Ensembl:ENSMUSG00000032011|Vega:OTTMUSG00000016734	9	protein-coding
290	ILMN_2773191	14681	Gnao1	guanine nucleotide binding protein, alpha O	2	4.27595	2775	GNAO1	MGI:95775|Ensembl:ENSMUSG00000031748|Vega:OTTMUSG00000034033	8	protein-coding
291	ILMN_2668236	100503659	Dos	downstream of Stk11	4	4.27223	255057	C19orf26	MGI:1354170|Ensembl:ENSMUSG00000035640|Vega:OTTMUSG00000000007	10	protein-coding
292	ILMN_2595600	19894	Rph3a	rabphilin 3A	1	4.24083	22895	RPH3A	MGI:102788|Ensembl:ENSMUSG00000029608	5	protein-coding
293	ILMN_2995549	231605	Galnt9	UDP-N-acetyl-alpha-D-galactosamine:polypeptide N-acetylgalactosaminyltransferase 9	3	4.23094	50614	GALNT9	MGI:2677965|Ensembl:ENSMUSG00000033316	5	protein-coding
294	ILMN_2991912	19339	Rab3a	RAB3A, member RAS oncogene family	5	4.23083	5864	RAB3A	MGI:97843|Ensembl:ENSMUSG00000031840|Vega:OTTMUSG00000016949	8	protein-coding
295	ILMN_2718030	109676	Ank2	ankyrin 2, brain	4	4.222	287	ANK2	MGI:88025|Ensembl:ENSMUSG00000032826	3	protein-coding
296	ILMN_1243596	235604	Camkv	CaM kinase-like vesicle-associated	1	4.22172	79012	CAMKV	MGI:2384296|Ensembl:ENSMUSG00000032936	9	protein-coding
297	ILMN_1229634	57775	Usp29	ubiquitin specific peptidase 29	1	4.2192	57663	USP29	MGI:1888998	7	protein-coding
298	ILMN_2672708	237253	Lrp11	low density lipoprotein receptor-related protein 11	4	4.21851	84918	LRP11	MGI:2442989|Ensembl:ENSMUSG00000019796|Vega:OTTMUSG00000032764	10	protein-coding
299	ILMN_1221429	56772	Mllt11	myeloid/lymphoid or mixed-lineage leukemia (trithorax homolog, Drosophila); translocated to, 11	4	4.21506	10962	MLLT11	MGI:1929671|Ensembl:ENSMUSG00000053192|Vega:OTTMUSG00000021997	3	protein-coding
300	ILMN_1249684	103768	Tubg2	tubulin, gamma 2	3	4.204	27175	TUBG2	MGI:2144208|Ensembl:ENSMUSG00000045007|Vega:OTTMUSG00000002705	11	protein-coding
301	ILMN_2718406	328778	Rab26	RAB26, member RAS oncogene family	4	4.20079	25837	RAB26	MGI:2443284|Ensembl:ENSMUSG00000079657	17	protein-coding
302	ILMN_1246983	238266	Syt16	synaptotagmin XVI	4	4.20008	83851	SYT16	MGI:2673872|Ensembl:ENSMUSG00000044912	12	protein-coding
303	ILMN_2473521	383348	Kctd16	potassium channel tetramerisation domain containing 16	1	4.19697	57528	KCTD16	MGI:1914659|Ensembl:ENSMUSG00000051401	18	protein-coding
304	ILMN_2649333	238323	Rps6kl1	ribosomal protein S6 kinase-like 1	3	4.1882	83694	RPS6KL1	MGI:2443413|Ensembl:ENSMUSG00000019235	12	protein-coding
305	ILMN_3061460	18212	Ntrk2	neurotrophic tyrosine kinase, receptor, type 2	0	4.16645	4915	NTRK2	MGI:97384|Ensembl:ENSMUSG00000055254	13	protein-coding
306	ILMN_1222844	217843	Unc79	unc-79 homolog (C. elegans)	3	4.16065	57578	UNC79	MGI:2684729|Ensembl:ENSMUSG00000021198|Vega:OTTMUSG00000037136	12	protein-coding
307	ILMN_2748091	20646	Snrpn	small nuclear ribonucleoprotein N	2	4.15415	6638	SNRPN	MGI:98347|Ensembl:ENSMUSG00000000948	7	protein-coding
308	ILMN_1226356	270097	Vat1l	vesicle amine transport protein 1 homolog-like (T. californica)	5	4.13997	57687	VAT1L	MGI:2142534|Ensembl:ENSMUSG00000046844|Vega:OTTMUSG00000031710	8	protein-coding
309	ILMN_1215847	14580	Gfap	glial fibrillary acidic protein	1	4.13692	2670	GFAP	MGI:95697|Ensembl:ENSMUSG00000020932|Vega:OTTMUSG00000003084	11	protein-coding
310	ILMN_2602902	11932	Atp1b2	ATPase, Na+/K+ transporting, beta 2 polypeptide	5	4.12937	482	ATP1B2	MGI:88109|Ensembl:ENSMUSG00000041329|Vega:OTTMUSG00000005985	11	protein-coding
311	ILMN_1244989	238988	Erc2	ELKS/RAB6-interacting/CAST family member 2	3	4.12624	26059	ERC2	MGI:1098749|Ensembl:ENSMUSG00000040640	14	protein-coding
312	ILMN_2684397	378937	Lrrc24	leucine rich repeat containing 24	3	4.12454	441381	LRRC24	MGI:3605040|Ensembl:ENSMUSG00000033707|Vega:OTTMUSG00000033518	15	protein-coding
313	ILMN_2762925	56808	Cacna2d2	calcium channel, voltage-dependent, alpha 2/delta subunit 2	4	4.12264	9254	CACNA2D2	MGI:1929813|Ensembl:ENSMUSG00000010066|Vega:OTTMUSG00000036844	9	protein-coding
314	ILMN_2717814	16502	Kcnc1	potassium voltage gated channel, Shaw-related subfamily, member 1	4	4.12177	3746	KCNC1	MGI:96667|Ensembl:ENSMUSG00000058975|Vega:OTTMUSG00000034762	7	protein-coding
315	ILMN_2993652	13004	Ncan	neurocan	0	4.11924	1463	NCAN	MGI:104694|Ensembl:ENSMUSG00000002341|Vega:OTTMUSG00000022194	8	protein-coding
316	ILMN_1244675	12933	Crmp1	collapsin response mediator protein 1	1	4.10203	1400	CRMP1	MGI:107793|Ensembl:ENSMUSG00000029121	5	protein-coding
317	ILMN_2442177	77531	Anks1b	ankyrin repeat and sterile alpha motif domain containing 1B	1	4.09796	56899	ANKS1B	MGI:1924781|Ensembl:ENSMUSG00000058589	10	protein-coding
318	ILMN_2739825	13426	Dync1i1	dynein cytoplasmic 1 intermediate chain 1	3	4.09593	1780	DYNC1I1	MGI:107743|Ensembl:ENSMUSG00000029757|Vega:OTTMUSG00000023538	6	protein-coding
319	ILMN_2652711	20972	Syngr1	synaptogyrin 1	1	4.08611	9145	SYNGR1	MGI:1328323|Ensembl:ENSMUSG00000022415|Vega:OTTMUSG00000016389	15	protein-coding
320	ILMN_2468981	276952	Rasl10b	RAS-like, family 10, member B	2	4.08231	91608	RASL10B	MGI:2685575|Ensembl:ENSMUSG00000020684|Vega:OTTMUSG00000000933	11	protein-coding
321	ILMN_1245780	319504	Nrcam	neuron-glia-CAM-related cell adhesion molecule	5	4.08071	4897	NRCAM	MGI:104750|Ensembl:ENSMUSG00000020598	12	protein-coding
322	ILMN_2698880	210027	Slc35f3	solute carrier family 35, member F3	2	4.08062	148641	SLC35F3	MGI:2444426|Ensembl:ENSMUSG00000057060|Vega:OTTMUSG00000029955	8	protein-coding
323	ILMN_1250280	94217	Lrp1b	low density lipoprotein-related protein 1B (deleted in tumors)	1	4.0778	53353	LRP1B	MGI:2151136|Ensembl:ENSMUSG00000049252|Vega:OTTMUSG00000012311	2	protein-coding
324	ILMN_1234234	239420	Csmd3	CUB and Sushi multiple domains 3	2	4.07354	114788	CSMD3	MGI:2386403|Ensembl:ENSMUSG00000022311|Vega:OTTMUSG00000033335	15	protein-coding
325	ILMN_1216751	270162	Elmod1	ELMO domain containing 1	3	4.0716	55531	ELMOD1	MGI:3583900|Ensembl:ENSMUSG00000041986	9	protein-coding
326	ILMN_2596479	12322	Camk2a	calcium/calmodulin-dependent protein kinase II alpha	4	4.07088	815	CAMK2A	MGI:88256|Ensembl:ENSMUSG00000024617|Vega:OTTMUSG00000016302	18	protein-coding
327	ILMN_2992517	56526	Sept6	septin 6	2	4.06707	23157	SEPT6	MGI:1888939|Ensembl:ENSMUSG00000050379|Vega:OTTMUSG00000017110	X	protein-coding
328	ILMN_2730293	18574	Pde1b	phosphodiesterase 1B, Ca2+-calmodulin dependent	5	4.05255	5153	PDE1B	MGI:97523|Ensembl:ENSMUSG00000022489	15	protein-coding
329	ILMN_2440740	13199	Ddn	dendrin	2	4.0512	23109	DDN	MGI:108101|Ensembl:ENSMUSG00000059213	15	protein-coding
330	ILMN_2488092	23964	Odz2	odd Oz/ten-m homolog 2 (Drosophila)	2	4.04903	57451	ODZ2	MGI:1345184|Ensembl:ENSMUSG00000049336|Vega:OTTMUSG00000005420	11	protein-coding
331	ILMN_2549929	54160	Copg2	coatomer protein complex, subunit gamma 2	2	4.04826	26958	COPG2	MGI:1858683|Ensembl:ENSMUSG00000025607	6	protein-coding
332	ILMN_2557201	17758	Mtap4	microtubule-associated protein 4	1	4.04	4134	MAP4	MGI:97178|Ensembl:ENSMUSG00000032479|Vega:OTTMUSG00000035845	9	protein-coding
333	ILMN_1250286	17918	Myo5a	myosin VA	1	4.03477	4644	MYO5A	MGI:105976|Ensembl:ENSMUSG00000034593|Vega:OTTMUSG00000016492	9	protein-coding
334	ILMN_2481113	98366	Smap1	stromal membrane-associated protein 1	4	4.02618	60682	SMAP1	MGI:2138261|Ensembl:ENSMUSG00000026155|Vega:OTTMUSG00000026521	1	protein-coding
335	ILMN_1228308	269643	Ppp2r2c	protein phosphatase 2 (formerly 2A), regulatory subunit B (PR 52), gamma isoform	3	4.00696	5522	PPP2R2C	MGI:2442660|Ensembl:ENSMUSG00000029120|Vega:OTTMUSG00000022772	5	protein-coding
336	ILMN_2521965	22784	Slc30a3	solute carrier family 30 (zinc transporter), member 3	5	3.99287	7781	SLC30A3	MGI:1345280|Ensembl:ENSMUSG00000029151|Vega:OTTMUSG00000015164	5	protein-coding
337	ILMN_2732491	106014	Fam19a5	family with sequence similarity 19, member A5	2	3.9892	25817	FAM19A5	MGI:2146182|Ensembl:ENSMUSG00000054863	15	protein-coding
338	ILMN_2860699	13829	Epb4.9	erythrocyte protein band 4.9	4	3.98847	2039	EPB49	MGI:99670|Ensembl:ENSMUSG00000022099	14	protein-coding
339	ILMN_1227100	231380	Uba6	ubiquitin-like modifier activating enzyme 6	2	3.98809	55236	UBA6	MGI:1913894|Ensembl:ENSMUSG00000035898|Vega:OTTMUSG00000025609	5	protein-coding
340	ILMN_1237729	380684	Nefh	neurofilament, heavy polypeptide	2	3.98635	4744	NEFH	MGI:97309|Ensembl:ENSMUSG00000020396|Vega:OTTMUSG00000005075	11	protein-coding
341	ILMN_2812240	140723	Cacng5	calcium channel, voltage-dependent, gamma subunit 5	1	3.98314	27091	CACNG5	MGI:2157946|Ensembl:ENSMUSG00000040373|Vega:OTTMUSG00000003104	11	protein-coding
342	ILMN_2500540	108030	Lin7a	lin-7 homolog A (C. elegans)	3	3.98243	8825	LIN7A	MGI:2135609|Ensembl:ENSMUSG00000019906	10	protein-coding
343	ILMN_1243635	108013	Celf4	CUGBP, Elav-like family member 4	1	3.97676	56853	CELF4	MGI:1932407|Ensembl:ENSMUSG00000024268	18	protein-coding
344	ILMN_2481026	100072	Camta1	calmodulin binding transcription activator 1	4	3.9702	23261	CAMTA1	MGI:2140230|Ensembl:ENSMUSG00000014592|Vega:OTTMUSG00000010309	4	protein-coding
345	ILMN_2943972	72865	Cxx1c	CAAX box 1 homolog C (human)	5	3.96624	8933	FAM127A	MGI:1920115|Ensembl:ENSMUSG00000051851	X	protein-coding
346	ILMN_2732634	29873	Cspg5	chondroitin sulfate proteoglycan 5	2	3.96605	10675	CSPG5	MGI:1352747|Ensembl:ENSMUSG00000032482	9	protein-coding
347	ILMN_1239445	76980	Ube2ql1	ubiquitin-conjugating enzyme E2Q family-like 1	2	3.95749	134111	UBE2QL1	MGI:1924230|Ensembl:ENSMUSG00000052981	13	protein-coding
348	ILMN_2740419	56839	Lgi1	leucine-rich repeat LGI family, member 1	2	3.95317	9211	LGI1	MGI:1861691|Ensembl:ENSMUSG00000067242|Vega:OTTMUSG00000016342	19	protein-coding
349	ILMN_3162180	407812	Zfp941	zinc finger protein 941	3	3.95084			MGI:3039601|Ensembl:ENSMUSG00000060314|Vega:OTTMUSG00000022510	7	protein-coding
350	ILMN_2590421	20745	Spock1	sparc/osteonectin, cwcv and kazal-like domains proteoglycan 1	2	3.94496	6695	SPOCK1	MGI:105371|Ensembl:ENSMUSG00000056222	13	protein-coding
351	ILMN_1238295	320587	Tmem88b	transmembrane protein 88B	0	3.94174	643965	TMEM88B	MGI:2444329|Ensembl:ENSMUSG00000073680|Vega:OTTMUSG00000010852	4	protein-coding
352	ILMN_1251276	58188	Vstm2b	V-set and transmembrane domain containing 2B	4	3.94071	342865	VSTM2B	MGI:1914525|Ensembl:ENSMUSG00000039257	7	protein-coding
353	ILMN_2672903	270190	Ephb1	Eph receptor B1	3	3.93013	2047	EPHB1	MGI:1096337|Ensembl:ENSMUSG00000032537|Vega:OTTMUSG00000021086	9	protein-coding
354	ILMN_2467292	239606	Slc2a13	solute carrier family 2 (facilitated glucose transporter), member 13	4	3.92841	114134	SLC2A13	MGI:2146030|Ensembl:ENSMUSG00000036298|Vega:OTTMUSG00000020865	15	protein-coding
355	ILMN_2677824	96935	Susd4	sushi domain containing 4	5	3.92257	55061	SUSD4	MGI:2138351|Ensembl:ENSMUSG00000038576|Vega:OTTMUSG00000027014	1	protein-coding
356	ILMN_1220482	107528	Magee1	melanoma antigen, family E, 1	4	3.9163	57692	MAGEE1	MGI:2148149|Ensembl:ENSMUSG00000031227|Vega:OTTMUSG00000018098	X	protein-coding
357	ILMN_2645263	80883	Ntng1	netrin G1	3	3.91262	22854	NTNG1	MGI:1934028|Ensembl:ENSMUSG00000059857	3	protein-coding
358	ILMN_3160970	574402	Gpr17	G protein-coupled receptor 17	0	3.91098	2840	GPR17	MGI:3584514|Ensembl:ENSMUSG00000052229|Vega:OTTMUSG00000023990	18	protein-coding
359	ILMN_1249463	328643	Vwa5b2	von Willebrand factor A domain containing 5B2	1	3.90775	90113	VWA5B2	MGI:2681859|Ensembl:ENSMUSG00000046613|Vega:OTTMUSG00000026177	16	protein-coding
360	ILMN_2518284	23859	Dlg2	discs, large homolog 2 (Drosophila)	4	3.90656	1740	DLG2	MGI:1344351|Ensembl:ENSMUSG00000052572|Vega:OTTMUSG00000016974	7	protein-coding
361	ILMN_1239557	22239	Ugt8a	UDP galactosyltransferase 8A	4	3.89828	7368	UGT8	MGI:109522|Ensembl:ENSMUSG00000032854	3	protein-coding
362	ILMN_1254128	240121	Fsd1	fibronectin type 3 and SPRY domain-containing protein	1	3.89637	79187	FSD1	MGI:1934858|Ensembl:ENSMUSG00000011589	17	protein-coding
363	ILMN_2760540	223726	Mpped1	metallophosphoesterase domain containing 1	2	3.89612	758	MPPED1	MGI:106316|Ensembl:ENSMUSG00000041708|Vega:OTTMUSG00000026120	15	protein-coding
364	ILMN_1247503	381418	Ctxn2	cortexin 2	1	3.88027	399697	CTXN2	MGI:2139444|Ensembl:ENSMUSG00000074872	2	protein-coding
365	ILMN_1229427	72930	Ppp2r2b	protein phosphatase 2 (formerly 2A), regulatory subunit B (PR 52), beta isoform	3	3.87721	5521	PPP2R2B	MGI:1920180|Ensembl:ENSMUSG00000024500|Vega:OTTMUSG00000028098	18	protein-coding
366	ILMN_2610442	216881	Wscd1	WSC domain containing 1	2	3.8738	23302	WSCD1	MGI:2448493|Ensembl:ENSMUSG00000020811|Vega:OTTMUSG00000006094	11	protein-coding
367	ILMN_1242173	58807	Slco1c1	solute carrier organic anion transporter family, member 1c1	1	3.86828	53919	SLCO1C1	MGI:1889679|Ensembl:ENSMUSG00000030235|Vega:OTTMUSG00000021195	6	protein-coding
368	ILMN_2988743	14617	Gjd2	gap junction protein, delta 2	2	3.84135	57369	GJD2	MGI:1334209|Ensembl:ENSMUSG00000068615|Vega:OTTMUSG00000015176	2	protein-coding
369	ILMN_2481279	269788	Lhfpl4	lipoma HMGIC fusion partner-like protein 4	1	3.84134	375323	LHFPL4	MGI:3057108|Ensembl:ENSMUSG00000042873|Vega:OTTMUSG00000034861	6	protein-coding
370	ILMN_1251064	432450	Nkain2	Na+/K+ transporting ATPase interacting 2	1	3.83878	154215	NKAIN2	MGI:1923447|Ensembl:ENSMUSG00000069671	10	protein-coding
371	ILMN_2729364	237213	Glra2	glycine receptor, alpha 2 subunit	1	3.83747	2742	GLRA2	MGI:95748|Ensembl:ENSMUSG00000018589|Vega:OTTMUSG00000019555	X	protein-coding
372	ILMN_1252821	76982	3110035E14Rik	RIKEN cDNA 3110035E14 gene	2	3.83373	254778	C8orf46	MGI:1924232|Ensembl:ENSMUSG00000067879|Vega:OTTMUSG00000022603	1	protein-coding
373	ILMN_2760629	18195	Nsf	N-ethylmaleimide sensitive fusion protein	2	3.81261	4905	NSF	MGI:104560|Ensembl:ENSMUSG00000034187|Vega:OTTMUSG00000003022	11	protein-coding
374	ILMN_1254104	213760	Prepl	prolyl endopeptidase-like	2	3.8105	9581	PREPL	MGI:2441932|Ensembl:ENSMUSG00000024127	17	protein-coding
375	ILMN_2599233	20284	Scrg1	scrapie responsive gene 1	2	3.80371	11341	SCRG1	MGI:1328308|Ensembl:ENSMUSG00000031610	8	protein-coding
376	ILMN_3074952	54161	Copg	coatomer protein complex, subunit gamma	2	3.80018	22820	COPG	MGI:1858696|Ensembl:ENSMUSG00000030058|Vega:OTTMUSG00000022960	6	protein-coding
377	ILMN_2856798	51799	Rundc3a	RUN domain containing 3A	3	3.79893	10900	RUNDC3A	MGI:1858752|Ensembl:ENSMUSG00000006575|Vega:OTTMUSG00000002785	11	protein-coding
378	ILMN_1235042	64450	Gpr85	G protein-coupled receptor 85	3	3.79278	54329	GPR85	MGI:1927851|Ensembl:ENSMUSG00000048216|Vega:OTTMUSG00000022773	6	protein-coding
379	ILMN_2514202	59033	Slc4a8	solute carrier family 4 (anion exchanger), member 8	2	3.77928	9498	SLC4A8	MGI:1928745|Ensembl:ENSMUSG00000023032|Vega:OTTMUSG00000035009	15	protein-coding
380	ILMN_2704110	14788	Gpr162	G protein-coupled receptor 162	3	3.77875	27239	GPR162	MGI:1315214|Ensembl:ENSMUSG00000038390	6	protein-coding
381	ILMN_2696110	72948	Tppp	tubulin polymerization promoting protein	5	3.77372	11076	TPPP	MGI:1920198|Ensembl:ENSMUSG00000021573|Vega:OTTMUSG00000027757	13	protein-coding
382	ILMN_2501605	18751	Prkcb	protein kinase C, beta	5	3.75765	5579	PRKCB	MGI:97596|Ensembl:ENSMUSG00000052889|Vega:OTTMUSG00000016521	7	protein-coding
383	ILMN_1244913	20191	Ryr2	ryanodine receptor 2, cardiac	5	3.75166	6262	RYR2	MGI:99685|Ensembl:ENSMUSG00000021313	13	protein-coding
384	ILMN_2727847	545156	Kalrn	kalirin, RhoGEF kinase	3	3.74008	8997	KALRN	MGI:2685385|Ensembl:ENSMUSG00000061751|Vega:OTTMUSG00000017795	16	protein-coding
385	ILMN_1253269	240843	Fam5b	family with sequence similarity 5, member B	1	3.73985	57795	FAM5B	MGI:2443333|Ensembl:ENSMUSG00000004031	1	protein-coding
386	ILMN_3101483	66673	Sorcs3	sortilin-related VPS10 domain containing receptor 3	1	3.73249	22986	SORCS3	MGI:1913923|Ensembl:ENSMUSG00000063434	19	protein-coding
387	ILMN_2599008	67703	Kirrel3	kin of IRRE like 3 (Drosophila)	2	3.72986	84623	KIRREL3	MGI:1914953|Ensembl:ENSMUSG00000032036|Vega:OTTMUSG00000016800	9	protein-coding
388	ILMN_2417413	67144	Lrrc40	leucine rich repeat containing 40	2	3.7254	55631	LRRC40	MGI:1914394|Ensembl:ENSMUSG00000063052|Vega:OTTMUSG00000031933	3	protein-coding
389	ILMN_3076948	12937	Pcdha6	protocadherin alpha 6	3	3.72463	56142	PCDHA6	MGI:1298367	18	protein-coding
390	ILMN_2736314	320158	Zmat4	zinc finger, matrin type 4	3	3.72204	79698	ZMAT4	MGI:2443497|Ensembl:ENSMUSG00000037492|Vega:OTTMUSG00000030997	8	protein-coding
391	ILMN_2836312	319655	Podxl2	podocalyxin-like 2	5	3.71305	50512	PODXL2	MGI:2442488|Ensembl:ENSMUSG00000033152|Vega:OTTMUSG00000024320	6	protein-coding
392	ILMN_1229019	230903	Fbxo44	F-box protein 44	4	3.71299	93611	FBXO44	MGI:1354744|Ensembl:ENSMUSG00000029001|Vega:OTTMUSG00000010932	4	protein-coding
393	ILMN_2966602	353326	Rtl1	retrotransposon-like 1	2	3.7067	388015	RTL1	MGI:2656842	12	protein-coding
394	ILMN_1247915	68729	Trim37	tripartite motif-containing 37	1	3.70249	4591	TRIM37	MGI:2153072|Ensembl:ENSMUSG00000018548|Vega:OTTMUSG00000001222	11	protein-coding
395	ILMN_2590848	56471	Stmn4	stathmin-like 4	2	3.68831	81551	STMN4	MGI:1931224|Ensembl:ENSMUSG00000022044|Vega:OTTMUSG00000027814	14	protein-coding
396	ILMN_2432568	14804	Grid2	glutamate receptor, ionotropic, delta 2	2	3.68719	2895	GRID2	MGI:95813|Ensembl:ENSMUSG00000071424|Vega:OTTMUSG00000034292	6	protein-coding
397	ILMN_1224996	20370	Sez6	seizure related gene 6	1	3.67843	124925	SEZ6	MGI:104745|Ensembl:ENSMUSG00000000632|Vega:OTTMUSG00000000068	11	protein-coding
398	ILMN_2715848	245446	Slitrk4	SLIT and NTRK-like family, member 4	0	3.67508	139065	SLITRK4	MGI:2442509|Ensembl:ENSMUSG00000046699|Vega:OTTMUSG00000017598	X	protein-coding
399	ILMN_2596560	218194	Phactr1	phosphatase and actin regulator 1	5	3.67174	221692	PHACTR1	MGI:2659021|Ensembl:ENSMUSG00000054728|Vega:OTTMUSG00000023876	13	protein-coding
400	ILMN_2698911	67937	Tmem59l	transmembrane protein 59-like	3	3.67028	25789	TMEM59L	MGI:1915187|Ensembl:ENSMUSG00000035964	8	protein-coding
401	ILMN_2783873	18610	Pdyn	prodynorphin	3	3.66166	5173	PDYN	MGI:97535	2	protein-coding
402	ILMN_2740869	116838	Rims2	regulating synaptic membrane exocytosis 2	3	3.66116	116839	Rims2	MGI:2152972|Ensembl:ENSMUSG00000037386	15	protein-coding
403	ILMN_2553162	243499	Lrrtm4	leucine rich repeat transmembrane neuronal 4	1	3.65946	80059	LRRTM4	MGI:2389180|Ensembl:ENSMUSG00000052581|Vega:OTTMUSG00000034091	6	protein-coding
404	ILMN_1216639	18481	Pak3	p21 protein (Cdc42/Rac)-activated kinase 3	5	3.63789	5063	PAK3	MGI:1339656|Ensembl:ENSMUSG00000031284|Vega:OTTMUSG00000018957	X	protein-coding
405	ILMN_2818246	74020	Cpne4	copine IV	3	3.62499	131034	CPNE4	MGI:1921270|Ensembl:ENSMUSG00000032564|Vega:OTTMUSG00000023466	9	protein-coding
406	ILMN_1213289	207182	Ggt7	gamma-glutamyltransferase 7	3	3.62295	2686	GGT7	MGI:1913385|Ensembl:ENSMUSG00000027603|Vega:OTTMUSG00000016060	2	protein-coding
407	ILMN_2689346	320840	Negr1	neuronal growth regulator 1	4	3.60849	257194	NEGR1	MGI:2444846|Ensembl:ENSMUSG00000040037|Vega:OTTMUSG00000024007	3	protein-coding
408	ILMN_2730311	18993	Pou3f3	POU domain, class 3, transcription factor 3	4	3.6071	5455	POU3F3	MGI:102564|Ensembl:ENSMUSG00000045515|Vega:OTTMUSG00000022569	1	protein-coding
409	ILMN_2764112	72832	Crtac1	cartilage acidic protein 1	4	3.59843	55118	CRTAC1	MGI:1920082|Ensembl:ENSMUSG00000042401	19	protein-coding
410	ILMN_2618244	72961	Slc17a7	solute carrier family 17 (sodium-dependent inorganic phosphate cotransporter), member 7	3	3.58174	57030	SLC17A7	MGI:1920211|Ensembl:ENSMUSG00000070570	7	protein-coding
411	ILMN_3049961	64009	Syne1	synaptic nuclear envelope 1	4	3.5802	23345	SYNE1	MGI:1927152|Ensembl:ENSMUSG00000019769	10	protein-coding
412	ILMN_1225587	192663	Abcg4	ATP-binding cassette, sub-family G (WHITE), member 4	5	3.57292	64137	ABCG4	MGI:1890594|Ensembl:ENSMUSG00000032131|Vega:OTTMUSG00000029282	9	protein-coding
413	ILMN_2433635	13839	Epha5	Eph receptor A5	4	3.56242	2044	EPHA5	MGI:99654|Ensembl:ENSMUSG00000029245|Vega:OTTMUSG00000021427	5	protein-coding
414	ILMN_2847248	218544	Sgtb	small glutamine-rich tetratricopeptide repeat (TPR)-containing, beta	4	3.56161	54557	SGTB	MGI:2444615|Ensembl:ENSMUSG00000042743|Vega:OTTMUSG00000035056	13	protein-coding
415	ILMN_2918944	319211	Nol4	nucleolar protein 4	2	3.55883	8715	NOL4	MGI:2441684|Ensembl:ENSMUSG00000041923|Vega:OTTMUSG00000035216	18	protein-coding
416	ILMN_2475795	268354	Fam19a2	family with sequence similarity 19, member A2	1	3.54671	338811	FAM19A2	MGI:2143691|Ensembl:ENSMUSG00000044071	10	protein-coding
417	ILMN_2727857	16490	Kcna2	potassium voltage-gated channel, shaker-related subfamily, member 2	5	3.53276	3737	KCNA2	MGI:96659|Ensembl:ENSMUSG00000040724	3	protein-coding
418	ILMN_1242601	108071	Grm5	glutamate receptor, metabotropic 5	1	3.52819	2915	GRM5	MGI:1351342|Ensembl:ENSMUSG00000049583|Vega:OTTMUSG00000016489	7	protein-coding
419	ILMN_2739111	320208	Tmem91	transmembrane protein 91	3	3.52568	641649	TMEM91	MGI:2443589|Ensembl:ENSMUSG00000061702|Vega:OTTMUSG00000023706	7	protein-coding
420	ILMN_2642444	272381	Lrrc4b	leucine rich repeat containing 4B	3	3.52351	94030	LRRC4B	MGI:3027390|Ensembl:ENSMUSG00000047085|Vega:OTTMUSG00000027279	7	protein-coding
421	ILMN_2719361	241919	Slc7a14	solute carrier family 7 (cationic amino acid transporter, y+ system), member 14	3	3.52265	57709	SLC7A14	MGI:3040688|Ensembl:ENSMUSG00000069072|Vega:OTTMUSG00000022774	3	protein-coding
422	ILMN_2479273	227632	Kcnt1	potassium channel, subfamily T, member 1	5	3.50235	57582	KCNT1	MGI:1924627|Ensembl:ENSMUSG00000058740|Vega:OTTMUSG00000012660	2	protein-coding
423	ILMN_2780022	75769	4833424O15Rik	RIKEN cDNA 4833424O15 gene	2	3.49922	163404	LPPR5	MGI:1923019|Ensembl:ENSMUSG00000033342|Vega:OTTMUSG00000026606	3	protein-coding
424	ILMN_2639849	228942	Cbln4	cerebellin 4 precursor protein	2	3.49033	140689	CBLN4	MGI:2154433|Ensembl:ENSMUSG00000067578|Vega:OTTMUSG00000016162	2	protein-coding
425	ILMN_1218712	319984	Jph4	junctophilin 4	3	3.48797	84502	JPH4	MGI:2443113|Ensembl:ENSMUSG00000022208|Vega:OTTMUSG00000027953	14	protein-coding
426	ILMN_2859960	432530	Adcy1	adenylate cyclase 1	3	3.48337	107	ADCY1	MGI:99677|Ensembl:ENSMUSG00000020431|Vega:OTTMUSG00000005134	11	protein-coding
427	ILMN_2732079	239650	AI836003	expressed sequence AI836003	3	3.47452	387856	C12orf68	MGI:2146066|Ensembl:ENSMUSG00000029875	15	protein-coding
428	ILMN_1241838	12291	Cacna1g	calcium channel, voltage-dependent, T type, alpha 1G subunit	5	3.46368	8913	CACNA1G	MGI:1201678|Ensembl:ENSMUSG00000020866|Vega:OTTMUSG00000001890	11	protein-coding
429	ILMN_1220131	15165	Hcn1	hyperpolarization-activated, cyclic nucleotide-gated K+ 1	4	3.46057	348980	HCN1	MGI:1096392|Ensembl:ENSMUSG00000021730|Vega:OTTMUSG00000035649	13	protein-coding
430	ILMN_1220815	53420	Syt5	synaptotagmin V	5	3.46015	6861	SYT5	MGI:1926368|Ensembl:ENSMUSG00000004961	7	protein-coding
431	ILMN_2707941	14608	Gpr83	G protein-coupled receptor 83	4	3.45345	10888	GPR83	MGI:95712|Ensembl:ENSMUSG00000031932|Vega:OTTMUSG00000027389	9	protein-coding
432	ILMN_2856946	211383	Fam123c	family with sequence similarity 123, member C	2	3.4177	205147	FAM123C	MGI:3026939|Ensembl:ENSMUSG00000045174	1	protein-coding
433	ILMN_1252806	268934	Grm4	glutamate receptor, metabotropic 4	5	3.41362	2914	GRM4	MGI:1351341|Ensembl:ENSMUSG00000063239|Vega:OTTMUSG00000028925	17	protein-coding
434	ILMN_2645071	64011	Nrgn	neurogranin	3	3.40007	4900	NRGN	MGI:1927184|Ensembl:ENSMUSG00000053310	9	protein-coding
435	ILMN_2814927	12652	Chga	chromogranin A	4	3.39741	1113	CHGA	MGI:88394|Ensembl:ENSMUSG00000021194	12	protein-coding
436	ILMN_1219658	268890	Lsamp	limbic system-associated membrane protein	3	3.39697	4045	LSAMP	MGI:1261760|Ensembl:ENSMUSG00000061080|Vega:OTTMUSG00000016989	16	protein-coding
437	ILMN_1235388	230868	Igsf21	immunoglobin superfamily, member 21	5	3.39541	84966	IGSF21	MGI:2681842|Ensembl:ENSMUSG00000040972|Vega:OTTMUSG00000010057	4	protein-coding
438	ILMN_1256814	16531	Kcnma1	potassium large conductance calcium-activated channel, subfamily M, alpha member 1	5	3.38031	3778	KCNMA1	MGI:99923|Ensembl:ENSMUSG00000063142	14	protein-coding
439	ILMN_2989312	228858	Gdap1l1	ganglioside-induced differentiation-associated protein 1-like 1	3	3.37562	78997	GDAP1L1	MGI:2385163|Ensembl:ENSMUSG00000017943|Vega:OTTMUSG00000001073	2	protein-coding
440	ILMN_2762672	12294	Cacna2d3	calcium channel, voltage-dependent, alpha2/delta subunit 3	4	3.36932	55799	CACNA2D3	MGI:1338890|Ensembl:ENSMUSG00000021991	14	protein-coding
441	ILMN_2453107	241688	6330439K17Rik	RIKEN cDNA 6330439K17 gene	4	3.35428	55184	DZANK1	MGI:2139080|Ensembl:ENSMUSG00000037259|Vega:OTTMUSG00000004235	2	protein-coding
442	ILMN_1216892	74342	Lrrtm1	leucine rich repeat transmembrane neuronal 1	2	3.3405	347730	LRRTM1	MGI:2389173|Ensembl:ENSMUSG00000060780|Vega:OTTMUSG00000034534	6	protein-coding
443	ILMN_2698299	14403	Gabrd	gamma-aminobutyric acid (GABA) A receptor, subunit delta	1	3.33991	2563	GABRD	MGI:95622|Ensembl:ENSMUSG00000029054|Vega:OTTMUSG00000010612	4	protein-coding
444	ILMN_2869082	236576	Spry3	sprouty homolog 3 (Drosophila)	3	3.33636	10251	SPRY3	MGI:1345188	X	protein-coding
445	ILMN_1248672	240332	Slc6a7	solute carrier family 6 (neurotransmitter transporter, L-proline), member 7	5	3.32511	6534	SLC6A7	MGI:2147363|Ensembl:ENSMUSG00000052026	18	protein-coding
446	ILMN_2746167	381813	Prmt8	protein arginine N-methyltransferase 8	2	3.31534	56341	PRMT8	MGI:3043083|Ensembl:ENSMUSG00000030350|Vega:OTTMUSG00000020414	6	protein-coding
447	ILMN_2928546	333605	Frmpd4	FERM and PDZ domain containing 4	3	3.31533	9758	FRMPD4	MGI:3042378|Ensembl:ENSMUSG00000049176|Vega:OTTMUSG00000019574	X	protein-coding
448	ILMN_1235647	20666	Sox11	SRY-box containing gene 11	5	3.30552	6664	SOX11	MGI:98359|Ensembl:ENSMUSG00000063632|Vega:OTTMUSG00000021163	12	protein-coding
449	ILMN_2911729	56461	Kcnip3	Kv channel interacting protein 3, calsenilin	5	3.29816	30818	KCNIP3	MGI:1929258|Ensembl:ENSMUSG00000079056|Vega:OTTMUSG00000016030	2	protein-coding
450	ILMN_2712316	229791	D3Bwg0562e	DNA segment, Chr 3, Brigham & Women's Genetics 0562 expressed	3	3.28001	9890	LPPR4	MGI:106530|Ensembl:ENSMUSG00000044667|Vega:OTTMUSG00000023917	3	protein-coding
451	ILMN_1213337	72693	Zcchc12	zinc finger, CCHC domain containing 12	3	3.26035	170261	ZCCHC12	MGI:1919943|Ensembl:ENSMUSG00000036699|Vega:OTTMUSG00000017218	X	protein-coding
452	ILMN_2613068	53870	Cntn6	contactin 6	3	3.23613	27255	CNTN6	MGI:1858223|Ensembl:ENSMUSG00000030092|Vega:OTTMUSG00000033392	6	protein-coding
453	ILMN_2524519	70727	Rasgef1a	RasGEF domain family, member 1A	4	3.23599	221002	RASGEF1A	MGI:1917977|Ensembl:ENSMUSG00000030134	6	protein-coding
454	ILMN_2582277	94253	Hecw1	HECT, C2 and WW domain containing E3 ubiquitin protein ligase 1	1	3.22987	23072	HECW1	MGI:2444115|Ensembl:ENSMUSG00000021301	13	protein-coding
455	ILMN_3062075	109593	Lmo3	LIM domain only 3	1	3.20249	55885	LMO3	MGI:102810|Ensembl:ENSMUSG00000030226|Vega:OTTMUSG00000034595	6	protein-coding
456	ILMN_2626345	18196	Nsg1	neuron specific gene family member 1	4	3.20236	27065	D4S234E	MGI:109149|Ensembl:ENSMUSG00000029126	5	protein-coding
457	ILMN_1228206	13193	Dcx	doublecortin	2	3.20146	1641	DCX	MGI:1277171|Ensembl:ENSMUSG00000031285|Vega:OTTMUSG00000018842	X	protein-coding
458	ILMN_3102035	15572	Elavl4	ELAV (embryonic lethal, abnormal vision, Drosophila)-like 4 (Hu antigen D)	4	3.18945	1996	ELAVL4	MGI:107427|Ensembl:ENSMUSG00000028546|Vega:OTTMUSG00000008498	4	protein-coding
459	ILMN_1254985	236915	Arhgef9	CDC42 guanine nucleotide exchange factor (GEF) 9	4	3.18566	23229	ARHGEF9	MGI:2442233|Ensembl:ENSMUSG00000025656|Vega:OTTMUSG00000018030	X	protein-coding
460	ILMN_1226295	242506	Frmd3	FERM domain containing 3	3	3.18338	257019	FRMD3	MGI:2442466|Ensembl:ENSMUSG00000049122|Vega:OTTMUSG00000000793	4	protein-coding
461	ILMN_2949444	242384	Lingo2	leucine rich repeat and Ig domain containing 2	1	3.17677	158038	LINGO2	MGI:2442298|Ensembl:ENSMUSG00000045083|Vega:OTTMUSG00000006502	4	protein-coding
462	ILMN_1244923	11784	Apba2	amyloid beta (A4) precursor protein-binding, family A, member 2	3	3.1483	321	APBA2	MGI:1261791|Ensembl:ENSMUSG00000030519|Vega:OTTMUSG00000023522	7	protein-coding
463	ILMN_1242557	26946	Trpc7	transient receptor potential cation channel, subfamily C, member 7	4	3.14505	57113	TRPC7	MGI:1349470|Ensembl:ENSMUSG00000021541|Vega:OTTMUSG00000024552	13	protein-coding
464	ILMN_2807572	18389	Oprl1	opioid receptor-like 1	3	3.14334	4987	OPRL1	MGI:97440|Ensembl:ENSMUSG00000027584|Vega:OTTMUSG00000016806	2	protein-coding
465	ILMN_2666080	73940	Hapln2	hyaluronan and proteoglycan link protein 2	4	3.13806	60484	HAPLN2	MGI:2137300|Ensembl:ENSMUSG00000004894|Vega:OTTMUSG00000027207	3	protein-coding
466	ILMN_1253137	14704	Gng3	guanine nucleotide binding protein (G protein), gamma 3	4	3.11038	2785	GNG3	MGI:102704|Ensembl:ENSMUSG00000071658	19	protein-coding
467	ILMN_1215713	13656	Egr4	early growth response 4	5	3.10612	1961	EGR4	MGI:99252|Ensembl:ENSMUSG00000071341	6	protein-coding
468	ILMN_1239565	19281	Ptprt	protein tyrosine phosphatase, receptor type, T	5	3.10534	11122	PTPRT	MGI:1321152|Ensembl:ENSMUSG00000053141|Vega:OTTMUSG00000015291	2	protein-coding
469	ILMN_2559272	210801	Unc5d	unc-5 homolog D (C. elegans)	4	3.09544	137970	UNC5D	MGI:2389364|Ensembl:ENSMUSG00000063626	8	protein-coding
470	ILMN_2663752	18526	Pcdh10	protocadherin 10	3	3.09531	57575	PCDH10	MGI:1338042|Ensembl:ENSMUSG00000049100	3	protein-coding
471	ILMN_2644008	12661	Chl1	cell adhesion molecule with homology to L1CAM	2	3.0928	10752	CHL1	MGI:1098266|Ensembl:ENSMUSG00000030077	6	protein-coding
472	ILMN_2463583	238384	Slc24a4	solute carrier family 24 (sodium/potassium/calcium exchanger), member 4	5	3.0728	123041	SLC24A4	MGI:2447362|Ensembl:ENSMUSG00000041771|Vega:OTTMUSG00000033883	12	protein-coding
473	ILMN_2798973	17932	Myt1	myelin transcription factor 1	5	3.04731	4661	MYT1	MGI:1100535|Ensembl:ENSMUSG00000010505|Vega:OTTMUSG00000016812	2	protein-coding
474	ILMN_2774528	69519	Rwdd2a	RWD domain containing 2A	4	3.04186	112611	RWDD2A	MGI:1916769|Ensembl:ENSMUSG00000032417	9	protein-coding
475	ILMN_1243701	14805	Grik1	glutamate receptor, ionotropic, kainate 1	3	3.02484	2897	GRIK1	MGI:95814|Ensembl:ENSMUSG00000022935	16	protein-coding
476	ILMN_1236474	232333	Slc6a1	solute carrier family 6 (neurotransmitter transporter, GABA), member 1	4	3.00671	6529	SLC6A1	MGI:95627|Ensembl:ENSMUSG00000030310	6	protein-coding
477	ILMN_2510839	72125	Fam123a	family with sequence similarity 123, member A	5	2.98176	219287	FAM123A	MGI:1919375|Ensembl:ENSMUSG00000021986	14	protein-coding
478	ILMN_1231710	12919	Crhbp	corticotropin releasing hormone binding protein	3	2.97864	1393	CRHBP	MGI:88497|Ensembl:ENSMUSG00000021680	13	protein-coding
