# Supplementary material for: Functionally Enigmatic Genes: A Case Study of the Brain Ignorome
Source: PLoS One. 2014 Feb 11;9(2):e88889. doi: 10.1371/journal.pone.0088889 (PMC3921226; doi:10.1371/journal.pone.0088889)
Supplement: Table S4 — (XLS) [file pone.0088889.s005.xls]

## Sheet: Table S3
	Table S4: Ignorome ranking of brain selective genes identified using Affymetrix M430v2 and Illumina MouseRef-6 v2.0 microarray platform. Genes selected have a Brain-to-Non Brain expression ratio of >8X and expression value of > 8 .
	Data from: Lommel LV, Thorrez L, Lemaire K, Schuit F , Literature coverage information derived from Pubmed
	Citation: Using ribosomal protein genes as reference: a tale of caution. PLoS One 2008 Mar 26;3(3):e1854. PMID: 18365009
	Annotation: Annotation file from Affymetrix and Genenetwork.org. Also, RNAseq data from Williams Lab has been used in some cases.
	Processed By: Ashutosh K Pandey
	Last edited : 03/29/2013
	Link: http://www.ncbi.nlm.nih.gov/projects/geo/query/acc.cgi?acc=GSE9954
	Acronym: ISE = Intense and selective expression
Index	Probe ID	Mouse GeneID	Gene Symbol	Gene Description	N of tissues with expression similar to brain	log(Ratio of Brain/Avg. of 22 other non-Brain tissues)	GeneID (Human)	Gene Symbol (Human)	MGI and Ensembl GeneIDs	Chromosome (Mouse)	Gene-type	Gene2Pubmed(Mouse)	Gene2Pubmed(Human)	Gene2Pubmed(Rat)	Gene2Pubmed(Mouse,Human,Rat)	Pubmed ( Without Ambiguity)	Neuroscience specific literature from Pubmed	Platform specific relative ISE score	ISE Rank	Literature Rank	Rank ( Decreasing order of Neuroscience Literature coverage)	Ignorome Score	Ignorome Score
1	ILMN_2741629	243339	Tmem130	transmembrane protein 130	1	6.90254	222865	TMEM130	MGI:3607706|Ensembl:ENSMUSG00000043388|Vega:OTTMUSG00000025590	5	protein-coding	0	0	1	1	1	1	0.818795	624	543	543	0.947847	0.947847
2	ILMN_1220054	208666	Diras1	DIRAS family, GTP-binding RAS-like 1	1	6.88306	148252	DIRAS1	MGI:2183442|Ensembl:ENSMUSG00000043670|Vega:OTTMUSG00000030296	10	protein-coding	0	2	0	2	2	1	0.816484	623	543	543	0.947097	0.947097
3	ILMN_2677569	270028	Fam155a	family with sequence similarity 155, member A	1	6.31808	728215	FAM155A	MGI:2142765|Ensembl:ENSMUSG00000079157	8	protein-coding	0	4	0	4	0	0	0.749465	577	582	581	0.941272	0.941272
4	ILMN_2875404	78593	Nrip3	nuclear receptor interacting protein 3	0	6.16351	56675	NRIP3	MGI:1925843|Ensembl:ENSMUSG00000034825|Vega:OTTMUSG00000027286	7	protein-coding	1	3	0	4	2	0	0.73113	565	582	581	0.930807	0.930807
5	ILMN_2734090	277432	Vstm2l	V-set and transmembrane domain containing 2-like	1	6.50481	128434	VSTM2L	MGI:2685537|Ensembl:ENSMUSG00000037843|Vega:OTTMUSG00000015887	2	protein-coding	0	2	0	2	1	1	0.771616	600	543	543	0.92952	0.92952
6	ILMN_2649172	66995	Zcchc18	zinc finger, CCHC domain containing 18	1	6.41374	644353	ZCCHC18	MGI:1914245|Ensembl:ENSMUSG00000031428|Vega:OTTMUSG00000018826	X	protein-coding	1	0	0	1	1	1	0.760812	592	543	543	0.923248	0.923248
7	ILMN_1227221	241263	Gpr158	G protein-coupled receptor 158	1	6.51077	57512	GPR158	MGI:2441697|Ensembl:ENSMUSG00000045967|Vega:OTTMUSG00000011438	2	protein-coding	2	4	0	6	4	2	0.772322	602	520	520	0.911004	0.911004
8	ILMN_1238627	319317	Snhg11	small nucleolar RNA host gene 11	2	5.90736	128439	SNHG11	MGI:2441845|Ensembl:ENSMUSG00000044349|Vega:OTTMUSG00000015934	2	protein-coding	0	1	0	1	0	0	0.700745	529	582	581	0.898132	0.898132
9	ILMN_1236932	76897	Ralyl	RALY RNA binding protein-like	1	6.35107	138046	RALYL	MGI:1924147|Ensembl:ENSMUSG00000039717	3	protein-coding	0	3	0	3	2	2	0.753378	582	520	520	0.895886	0.895886
10	ILMN_2636325	67254	2900011O08Rik	RIKEN cDNA 2900011O08 gene	1	5.84261	89927	C16orf45	MGI:1914504|Ensembl:ENSMUSG00000044117|Vega:OTTMUSG00000026346	16	protein-coding	0	0	0	0	0	0	0.693064	518	582	581	0.887746	0.887746
11	ILMN_1232850	12891	Cpne6	copine VI	1	6.45423	9362	CPNE6	MGI:1334445|Ensembl:ENSMUSG00000022212|Vega:OTTMUSG00000035549	14	protein-coding	4	4	0	8	4	3	0.765616	597	498	498	0.887402	0.887402
12	1437640_at	230235	Frrs1l	ferric-chelate reductase 1 like	0	5.03791	23732	FRRS1L	MGI:2442704|Ensembl:ENSMUSG00000045589|Vega:OTTMUSG00000007318	4	protein-coding	2	1	0	3	8	0	0.691413	517	582	581	0.886792	0.886792
13	ILMN_1221546	94090	Trim9	tripartite motif-containing 9	1	6.81437	114088	TRIM9	MGI:2137354|Ensembl:ENSMUSG00000021071	12	protein-coding	4	6	2	12	8	4	0.808336	622	477	477	0.884393	0.884393
14	ILMN_2765454	68666	Svop	SV2 related protein	2	6.66232	55530	SVOP	MGI:1915916|Ensembl:ENSMUSG00000042078|Vega:OTTMUSG00000030561	5	protein-coding	2	1	1	4	10	4	0.7903	611	477	477	0.877107	0.877107
15	ILMN_2480669	269774	Aak1	AP2 associated kinase 1	1	6.59264	22848	AAK1	MGI:1098687|Ensembl:ENSMUSG00000057230|Vega:OTTMUSG00000024486	6	protein-coding	1	14	4	19	21	4	0.782034	609	477	477	0.875768	0.875768
16	1428184_at	76982	3110035E14Rik	RIKEN cDNA 3110035E14 gene	0	4.9257	254778	C8orf46	MGI:1924232|Ensembl:ENSMUSG00000067879|Vega:OTTMUSG00000022603	1	protein-coding	0	0	0	0	1	0	0.676013	504	582	581	0.874241	0.874241
17	1417799_at	66237	Atp6v1g2	ATPase, H+ transporting, lysosomal V1 subunit G2	1	5.26239	534	ATP6V1G2	MGI:1913487|Ensembl:ENSMUSG00000024403|Vega:OTTMUSG00000031451	17	protein-coding	3	17	1	21	11	2	0.722221	554	520	520	0.873825	0.873825
18	ILMN_1228515	330369	Fbxo41	F-box protein 41	1	5.69637	150726	FBXO41	MGI:1261912|Ensembl:ENSMUSG00000047013|Vega:OTTMUSG00000029064	6	protein-coding	0	1	0	1	0	0	0.675716	503	582	581	0.873264	0.873264
19	ILMN_1256063	381338	Lonrf2	LON peptidase N-terminal domain and ring finger 2	1	5.66814	164832	LONRF2	MGI:1920209|Ensembl:ENSMUSG00000048814|Vega:OTTMUSG00000026560	1	protein-coding	0	0	0	0	0	0	0.672368	495	582	581	0.865385	0.865385
20	1434969_at	319586	Celf5	CUGBP, Elav-like family member 5	2	4.84055	60680	CELF5	MGI:2442333|Ensembl:ENSMUSG00000034818|Vega:OTTMUSG00000030422	10	protein-coding	0	3	0	3	0	0	0.664327	487	582	581	0.857394	0.857394
21	ILMN_2757844	76484	Kndc1	kinase non-catalytic C-lobe domain (KIND) containing 1	2	5.77362	85442	KNDC1	MGI:1923734|Ensembl:ENSMUSG00000066129	7	protein-coding	5	0	0	5	1	1	0.68488	513	543	543	0.856498	0.856498
22	ILMN_2916437	225392	Rell2	RELT-like 2	1	5.55261	285613	RELL2	MGI:1918044|Ensembl:ENSMUSG00000044024|Vega:OTTMUSG00000036303	18	protein-coding	0	2	0	2	2	0	0.658664	474	582	581	0.844167	0.844167
23	1433583_at	216049	Zfp365	zinc finger protein 365	1	5.62658	22891	ZNF365	MGI:2143676|Ensembl:ENSMUSG00000037855|Vega:OTTMUSG00000027948	10	protein-coding	3	17	0	20	42	6	0.772204	601	441	441	0.834262	0.834262
24	ILMN_2644068	72661	Serp2	stress-associated endoplasmic reticulum protein family member 2	2	5.44187	387923	SERP2	MGI:1919911|Ensembl:ENSMUSG00000052584	14	protein-coding	0	0	0	0	8	0	0.645527	461	582	581	0.830631	0.830631
25	ILMN_2655862	20974	Syngr3	synaptogyrin 3	1	5.98146	9143	SYNGR3	MGI:1341881|Ensembl:ENSMUSG00000007021|Vega:OTTMUSG00000028128	17	protein-coding	5	4	0	9	6	4	0.709534	537	477	477	0.8242	0.8242
26	1428525_at	71691	Pnmal1	PNMA-like 1	4	4.65026	55228	PNMAL1	MGI:1918941|Ensembl:ENSMUSG00000041141	7	protein-coding	0	1	0	1	0	0	0.638211	450	582	581	0.818926	0.818926
27	ILMN_2740306	243621	Iqsec3	IQ motif and Sec7 domain 3	1	5.72176	440073	IQSEC3	MGI:2677208|Ensembl:ENSMUSG00000040797|Vega:OTTMUSG00000023463	6	protein-coding	1	2	1	4	3	3	0.678728	508	498	498	0.818255	0.818255
28	ILMN_1249022	140904	Caln1	calneuron 1	2	6.4271	83698	CALN1	MGI:2155987|Ensembl:ENSMUSG00000060371|Vega:OTTMUSG00000023954	5	protein-coding	3	4	4	11	8	7	0.762397	593	428	428	0.81569	0.81569
29	1423853_at	76161	6330527O06Rik	RIKEN cDNA 6330527O06 gene	1	5.24002	24141	LAMP5	MGI:1923411|Ensembl:ENSMUSG00000027270|Vega:OTTMUSG00000015982	2	protein-coding	1	1	0	2	7	5	0.719151	549	456	456	0.814242	0.814242
30	1460570_at	209966	Pgbd5	piggyBac transposable element derived 5	4	4.63074	79605	PGBD5	MGI:2429955|Ensembl:ENSMUSG00000050751|Vega:OTTMUSG00000027609	8	protein-coding	1	2	0	3	0	0	0.635532	444	582	581	0.812443	0.812443
31	ILMN_2812599	228777	Nrsn2	neurensin 2	1	5.45368	80023	NRSN2	MGI:2684969|Ensembl:ENSMUSG00000059361|Vega:OTTMUSG00000015839	2	protein-coding	1	2	0	3	2	1	0.646928	463	543	543	0.809157	0.809157
32	1434052_at	330941	AI593442	expressed sequence AI593442	2	4.60456	399947	C11orf87	MGI:2143099|Ensembl:ENSMUSG00000078307	9	protein-coding	1	0	0	1	0	0	0.631939	440	582	581	0.808081	0.808081
33	ILMN_2933805	277468	Slc39a12	solute carrier family 39 (zinc transporter), member 12	2	5.31491	221074	SLC39A12	MGI:2139274|Ensembl:ENSMUSG00000036949|Vega:OTTMUSG00000011408	2	protein-coding	1	2	0	3	1	0	0.630467	437	582	581	0.804788	0.804788
34	ILMN_2748897	23934	Ly6h	lymphocyte antigen 6 complex, locus H	2	5.63804	4062	LY6H	MGI:1346030|Ensembl:ENSMUSG00000022577|Vega:OTTMUSG00000033674	15	protein-coding	2	2	0	4	5	3	0.668797	492	498	498	0.804579	0.804579
35	1434202_a_at	268709	Fam107a	family with sequence similarity 107, member A	3	5.41774	11170	FAM107A	MGI:3041256|Ensembl:ENSMUSG00000021750|Vega:OTTMUSG00000027765	14	protein-coding	3	6	0	9	19	7	0.743542	575	428	428	0.804449	0.804449
36	ILMN_1252636	75104	Mmd2	monocyte to macrophage differentiation-associated 2	4	5.62056	221938	MMD2	MGI:1922354|Ensembl:ENSMUSG00000039533	5	protein-coding	4	5	0	9	15	3	0.666723	490	498	498	0.80284	0.80284
37	ILMN_1237237	73032	Ttc9b	tetratricopeptide repeat domain 9B	0	5.29367	148014	TTC9B	MGI:1920282|Ensembl:ENSMUSG00000007944|Vega:OTTMUSG00000023957	7	protein-coding	0	0	0	0	0	0	0.627947	433	582	581	0.80037	0.80037
38	1451620_at	227580	C1ql3	C1q-like 3	1	5.33993	389941	C1QL3	MGI:2387350|Ensembl:ENSMUSG00000049630|Vega:OTTMUSG00000011228	2	protein-coding	5	2	0	7	45	7	0.732863	568	428	428	0.799974	0.799974
39	ILMN_2697205	11899	Astn1	astrotactin 1	1	5.84877	460	ASTN1	MGI:1098567|Ensembl:ENSMUSG00000026587	1	protein-coding	9	5	2	16	7	5	0.693795	520	456	456	0.792959	0.792959
40	1436268_at	13199	Ddn	dendrin	0	6.2754	23109	DDN	MGI:108101|Ensembl:ENSMUSG00000059213	15	protein-coding	5	6	6	17	16	11	0.861249	633	388	388	0.792802	0.792802
41	ILMN_2926480	68203	Diras2	DIRAS family, GTP-binding RAS-like 2	2	5.43702	54769	DIRAS2	MGI:1915453|Ensembl:ENSMUSG00000047842	13	protein-coding	1	3	0	4	2	2	0.644952	460	520	520	0.791084	0.791084
42	1434083_a_at	270162	Elmod1	ELMO domain containing 1	3	4.54516	55531	ELMOD1	MGI:3583900|Ensembl:ENSMUSG00000041986	9	protein-coding	1	2	0	3	3	1	0.623787	423	543	581	0.789179	0.789179
43	1429013_at	78283	Mtap7d2	MAP7 domain containing 2	4	4.53647	256714	MAP7D2	MGI:1917474|Ensembl:ENSMUSG00000041020|Vega:OTTMUSG00000019440	X	protein-coding	0	2	0	2	0	0	0.622594	421	582	581	0.786916	0.786916
44	ILMN_2608073	58243	Nap1l5	nucleosome assembly protein 1-like 5	2	5.59897	266812	NAP1L5	MGI:1923555|Ensembl:ENSMUSG00000055430	6	protein-coding	7	3	1	11	10	4	0.664163	484	477	477	0.781574	0.781574
45	ILMN_2630772	331532	Tceal5	transcription elongation factor A (SII)-like 5	2	5.22639	340543	TCEAL5	MGI:3036236|Ensembl:ENSMUSG00000054034|Vega:OTTMUSG00000018780	X	protein-coding	0	0	0	0	0	0	0.619967	416	582	581	0.781221	0.781221
46	1456387_at	319211	Nol4	nucleolar protein 4	3	4.59017	8715	NOL4	MGI:2441684|Ensembl:ENSMUSG00000041923|Vega:OTTMUSG00000035216	18	protein-coding	0	3	0	3	3	1	0.629964	435	543	543	0.78066	0.78066
47	1439971_at	241688	6330439K17Rik	RIKEN cDNA 6330439K17 gene	3	4.51669	55184	DZANK1	MGI:2139080|Ensembl:ENSMUSG00000037259|Vega:OTTMUSG00000004235	2	protein-coding	0	1	0	1	0	0	0.61988	415	582	581	0.780075	0.780075
48	ILMN_2710484	52822	Rufy3	RUN and FYVE domain containing 3	1	5.36637	22902	RUFY3	MGI:106484|Ensembl:ENSMUSG00000029291	5	protein-coding	2	2	1	5	9	2	0.636572	447	520	520	0.77845	0.77845
49	ILMN_2615412	64337	Gng13	guanine nucleotide binding protein (G protein), gamma 13	1	5.92276	51764	GNG13	MGI:1925616|Ensembl:ENSMUSG00000025739|Vega:OTTMUSG00000035881	17	protein-coding	11	10	0	21	12	7	0.702571	532	428	428	0.775975	0.775975
50	ILMN_2932508	170571	Cntnap4	contactin associated protein-like 4	1	5.56284	85445	CNTNAP4	MGI:2183572|Ensembl:ENSMUSG00000031772|Vega:OTTMUSG00000030975	8	protein-coding	1	7	0	8	6	4	0.659877	477	477	477	0.77561	0.77561
51	1418046_at	17954	Nap1l2	nucleosome assembly protein 1-like 2	3	5.11444	4674	NAP1L2	MGI:106654|Ensembl:ENSMUSG00000082229|Vega:OTTMUSG00000018175	X	protein-coding	9	4	0	13	10	7	0.701917	531	428	428	0.775284	0.775284
52	ILMN_1237399	19762	Rit2	Ras-like without CAAX 2	1	6.69778	6014	RIT2	MGI:108054|Ensembl:ENSMUSG00000057455|Vega:OTTMUSG00000033066	18	protein-coding	8	15	3	26	38	12	0.794507	615	378	378	0.771509	0.771509
53	1433987_at	170638	Hpcal4	hippocalcin-like 4	0	6.31818	51440	HPCAL4	MGI:2157521|Ensembl:ENSMUSG00000046093|Vega:OTTMUSG00000008935	4	protein-coding	2	1	6	9	22	13	0.86712	637	368	368	0.769929	0.769929
54	ILMN_3153010	75409	Slitrk5	SLIT and NTRK-like family, member 5	1	5.60955	26050	SLITRK5	MGI:2679448|Ensembl:ENSMUSG00000033214	14	protein-coding	4	3	0	7	6	5	0.665418	489	456	456	0.76884	0.76884
55	ILMN_1231274	67272	Cmtm5	CKLF-like MARVEL transmembrane domain containing 5	1	5.14627	116173	CMTM5	MGI:2447164|Ensembl:ENSMUSG00000040759	14	protein-coding	1	9	0	10	11	0	0.610462	404	582	581	0.767331	0.767331
56	1452240_at	108013	Celf4	CUGBP, Elav-like family member 4	3	5.50439	56853	CELF4	MGI:1932407|Ensembl:ENSMUSG00000024268	18	protein-coding	9	11	0	20	23	11	0.755434	585	388	388	0.767217	0.767217
57	1439048_at	239857	Cadm2	cell adhesion molecule 2	1	5.98309	253559	CADM2	MGI:2442722|Ensembl:ENSMUSG00000064115|Vega:OTTMUSG00000017090	16	protein-coding	3	5	2	10	22	13	0.821132	625	368	368	0.764174	0.764174
58	1454965_at	241520	Fam171b	family with sequence similarity 171, member B	5	4.42859	165215	FAM171B	MGI:2444579|Ensembl:ENSMUSG00000048388|Vega:OTTMUSG00000013394	2	protein-coding	0	0	0	0	0	0	0.607788	400	582	581	0.762631	0.762631
59	ILMN_2728682	320111	Prr18	proline rich region 18	2	5.12083	285800	PRR18	MGI:2443403|Ensembl:ENSMUSG00000055945	17	protein-coding	0	1	0	1	0	0	0.607445	399	582	581	0.76145	0.76145
60	ILMN_2488599	242662	Rims3	regulating synaptic membrane exocytosis 3	3	5.64186	9783	RIMS3	MGI:2443331|Ensembl:ENSMUSG00000032890|Vega:OTTMUSG00000008857	4	protein-coding	4	4	2	10	11	6	0.669251	494	441	441	0.760102	0.760102
61	ILMN_1218245	210933	Bai3	brain-specific angiogenesis inhibitor 3	1	5.84664	577	BAI3	MGI:2441837|Ensembl:ENSMUSG00000033569|Vega:OTTMUSG00000025352	1	protein-coding	5	8	0	13	10	8	0.693543	519	419	419	0.758404	0.758404
62	1425213_at	76886	Fam81a	family with sequence similarity 81, member A	0	4.41925	145773	FAM81A	MGI:1924136|Ensembl:ENSMUSG00000032224|Vega:OTTMUSG00000030841	9	protein-coding	0	0	0	0	0	0	0.606506	396	582	581	0.757895	0.757895
63	ILMN_3162247	72898	Asphd2	aspartate beta-hydroxylase domain containing 2	2	5.19745	57168	ASPHD2	MGI:1920148|Ensembl:ENSMUSG00000029348	5	protein-coding	0	0	0	0	3	1	0.616533	411	543	543	0.754986	0.754986
64	1438671_at	269643	Ppp2r2c	protein phosphatase 2 (formerly 2A), regulatory subunit B (PR 52), gamma isoform	2	4.74719	5522	PPP2R2C	MGI:2442660|Ensembl:ENSMUSG00000029120|Vega:OTTMUSG00000022772	5	protein-coding	2	25	3	30	11	5	0.651514	469	456	456	0.752469	0.752469
65	1434429_at	238266	Syt16	synaptotagmin XVI	2	4.47538	83851	SYT16	MGI:2673872|Ensembl:ENSMUSG00000044912	12	protein-coding	1	5	0	6	1	1	0.61421	408	543	543	0.751691	0.751691
66	ILMN_2745930	56370	Tagln3	transgelin 3	1	6.6872	29114	TAGLN3	MGI:1926784|Ensembl:ENSMUSG00000022658|Vega:OTTMUSG00000026844	16	protein-coding	3	5	3	11	20	14	0.793251	613	360	360	0.74833	0.74833
67	ILMN_2594139	103712	6330403K07Rik	RIKEN cDNA 6330403K07 gene	2	5.06783	728392	LOC728392	MGI:1918001	11	protein-coding	2	0	0	2	0	0	0.601158	385	582	581	0.744681	0.744681
68	ILMN_2764344	320705	Bend6	BEN domain containing 6	1	5.05398	221336	BEND6	MGI:2444572|Ensembl:ENSMUSG00000042182|Vega:OTTMUSG00000021502	1	protein-coding	1	0	0	1	1	0	0.599514	383	582	581	0.742248	0.742248
69	ILMN_1258935	29859	Sult4a1	sulfotransferase family 4A, member 1	1	7.00892	25830	SULT4A1	MGI:1888971|Ensembl:ENSMUSG00000018865	15	protein-coding	1	14	0	15	25	15	0.831415	627	350	350	0.742091	0.742091
70	ILMN_1227376	329178	Unc80	unc-80 homolog (C. elegans)	1	5.46213	285175	UNC80	MGI:2652882|Ensembl:ENSMUSG00000055567|Vega:OTTMUSG00000026091	1	protein-coding	2	4	0	6	7	6	0.64793	465	441	441	0.737148	0.737148
71	1440286_at	214931	Fbxl16	F-box and leucine-rich repeat protein 16	3	4.4117	146330	FBXL16	MGI:2448488|Ensembl:ENSMUSG00000025738	17	protein-coding	1	1	1	3	2	1	0.605471	394	543	543	0.736055	0.736055
72	ILMN_2513378	19059	Ppp3r2	protein phosphatase 3, regulatory subunit B, alpha isoform (calcineurin B, type II)	1	5.55931	5535	PPP3R2	MGI:107171|Ensembl:ENSMUSG00000028310|Vega:OTTMUSG00000006951	4	protein-coding	17	11	7	35	39	7	0.659458	476	428	428	0.735045	0.735045
73	ILMN_2839027	66104	Tceal6	transcription elongation factor A (SII)-like 6	2	4.9843	85012	TCEAL3	MGI:1923939|Ensembl:ENSMUSG00000031409|Vega:OTTMUSG00000018755	X	protein-coding	0	1	0	1	0	0	0.591249	371	582	581	0.727451	0.727451
74	ILMN_1256309	233271	Luzp2	leucine zipper protein 2	0	5.18622	338645	LUZP2	MGI:1889615|Ensembl:ENSMUSG00000063297	7	protein-coding	4	4	0	8	3	3	0.615201	410	498	498	0.72738	0.72738
75	ILMN_1237338	30959	Ddx25	DEAD (Asp-Glu-Ala-Asp) box polypeptide 25	2	5.11309	29118	DDX25	MGI:1353582|Ensembl:ENSMUSG00000032101	9	protein-coding	11	8	5	24	24	2	0.606526	397	520	520	0.726726	0.726726
76	ILMN_1236175	22153	Tubb4a	tubulin, beta 4A class IVA	0	6.1276	10382	TUBB4A	MGI:107848|Ensembl:ENSMUSG00000062591	17	protein-coding	54	26	0	80	57	14	0.726871	560	360	360	0.721288	0.721288
77	1435218_at	70727	Rasgef1a	RasGEF domain family, member 1A	1	4.44633	221002	RASGEF1A	MGI:1917977|Ensembl:ENSMUSG00000030134	6	protein-coding	0	5	0	5	6	3	0.610223	402	498	498	0.719141	0.719141
78	ILMN_2429238	76965	Slitrk1	SLIT and NTRK-like family, member 1	0	6.05889	114798	SLITRK1	MGI:2679446|Ensembl:ENSMUSG00000075478	14	protein-coding	7	20	0	27	28	14	0.71872	547	360	360	0.714194	0.714194
79	ILMN_2841307	77629	Sphkap	SPHK1 interactor, AKAP domain containing	4	4.99762	80309	SPHKAP	MGI:1924879|Ensembl:ENSMUSG00000026163|Vega:OTTMUSG00000030288	1	protein-coding	3	8	1	12	4	1	0.592829	374	543	543	0.712942	0.712942
80	1416107_at	18197	Nsg2	neuron specific gene family member 2	5	4.70482	51617	HMP19	MGI:1202070|Ensembl:ENSMUSG00000020297|Vega:OTTMUSG00000005366	11	protein-coding	5	1	0	6	58	9	0.6457	462	409	409	0.707889	0.707889
81	ILMN_2730909	245607	Gprasp2	G protein-coupled receptor associated sorting protein 2	3	5.01093	114928	GPRASP2	MGI:2442071|Ensembl:ENSMUSG00000072966|Vega:OTTMUSG00000018752	X	protein-coding	2	3	0	5	4	2	0.594408	377	520	520	0.704525	0.704525
82	ILMN_2977871	319642	Rab9b	RAB9B, member RAS oncogene family	2	4.96687	51209	RAB9B	MGI:2442454|Ensembl:ENSMUSG00000043463|Vega:OTTMUSG00000018802	X	protein-coding	0	7	0	7	1	1	0.589181	366	543	543	0.703431	0.703431
83	1456108_x_at	22671	Rnf112	ring finger protein 112	3	4.71519	7732	RNF112	MGI:106611|Ensembl:ENSMUSG00000010086|Vega:OTTMUSG00000005832	11	protein-coding	8	4	2	14	10	10	0.647122	464	401	401	0.70235	0.70235
84	1440270_at	14167	Fgf12	fibroblast growth factor 12	1	5.21866	2257	FGF12	MGI:109183|Ensembl:ENSMUSG00000022523	16	protein-coding	20	15	4	39	42	15	0.716219	542	350	350	0.699933	0.699933
85	ILMN_2824889	226115	Opalin	oligodendrocytic myelin paranodal and inner loop protein	0	5.2395	93377	OPALIN	MGI:2657025|Ensembl:ENSMUSG00000050121	19	protein-coding	7	3	1	11	7	6	0.621522	417	441	441	0.695939	0.695939
86	1439833_at	24050	Sept3	septin 3	2	5.13232	55964	SEPT3	MGI:1345148|Ensembl:ENSMUSG00000022456	15	protein-coding	6	5	4	15	76	15	0.704371	533	350	350	0.695015	0.695015
87	1437744_at	245446	Slitrk4	SLIT and NTRK-like family, member 4	1	4.26238	139065	SLITRK4	MGI:2442509|Ensembl:ENSMUSG00000046699|Vega:OTTMUSG00000017598	X	protein-coding	4	2	0	6	3	1	0.584977	359	543	543	0.69498	0.69498
88	ILMN_2805839	56747	Sez6l	seizure related 6 homolog like	1	5.08506	23544	SEZ6L	MGI:1935121|Ensembl:ENSMUSG00000058153	5	protein-coding	4	9	0	13	13	4	0.603201	390	477	477	0.693931	0.693931
89	1437201_at	241568	Lrrc4c	leucine rich repeat containing 4C	2	4.65946	57689	LRRC4C	MGI:2442636|Ensembl:ENSMUSG00000050587|Vega:OTTMUSG00000014522	2	protein-coding	5	6	0	11	22	10	0.639474	452	401	401	0.693309	0.693309
90	ILMN_1214737	15571	Elavl3	ELAV (embryonic lethal, abnormal vision, Drosophila)-like 3 (Hu antigen C)	1	6.25531	1995	ELAVL3	MGI:109157|Ensembl:ENSMUSG00000003410	9	protein-coding	66	7	3	76	32	19	0.74202	574	330	330	0.691738	0.691738
91	1436188_a_at	234593	Ndrg4	N-myc downstream regulated gene 4	3	5.26976	65009	NDRG4	MGI:2384590|Ensembl:ENSMUSG00000036564|Vega:OTTMUSG00000027408	8	protein-coding	4	14	8	26	33	18	0.723233	555	337	337	0.691227	0.691227
92	1458662_at	208846	Daam1	dishevelled associated activator of morphogenesis 1	0	5.09776	23002	DAAM1	MGI:1914596|Ensembl:ENSMUSG00000034574	12	protein-coding	11	14	1	26	46	15	0.699627	526	350	350	0.691123	0.691123
93	ILMN_2704027	71803	Slc25a18	solute carrier family 25 (mitochondrial carrier), member 18	0	6.06674	83733	SLC25A18	MGI:1919053|Ensembl:ENSMUSG00000004902	6	protein-coding	1	4	0	5	146	18	0.71965	550	337	337	0.688697	0.688697
94	1424547_at	72605	Car10	carbonic anhydrase 10	2	4.78049	56934	CA10	MGI:1919855|Ensembl:ENSMUSG00000056158|Vega:OTTMUSG00000001341	11	protein-coding	2	9	0	11	97	12	0.656084	472	378	378	0.686804	0.686804
95	1435083_at	330695	Ctxn1	cortexin 1	2	4.45403	404217	CTXN1	MGI:88566|Ensembl:ENSMUSG00000048644	8	protein-coding	3	1	1	5	34	6	0.61128	405	441	441	0.684948	0.684948
96	ILMN_2658198	52389	Gpr123	G protein-coupled receptor 123	2	4.88762	84435	GPR123	MGI:1277167|Ensembl:ENSMUSG00000025475|Vega:OTTMUSG00000023085	7	protein-coding	3	4	0	7	5	1	0.57978	350	543	543	0.683932	0.683932
97	1421349_x_at	57754	Cend1	cell cycle exit and neuronal differentiation 1	1	5.54028	51286	CEND1	MGI:1929898|Ensembl:ENSMUSG00000060240|Vega:OTTMUSG00000034077	7	protein-coding	8	3	1	12	21	21	0.760359	590	318	318	0.683283	0.683283
98	1429938_at	434008	Gm5567	predicted gene 5567	4	4.15821	100507421	LOC100507421	MGI:3647581|Ensembl:ENSMUSG00000057716	6	protein-coding	0	0	0	0	0	0	0.570681	336	582	581	0.682234	0.682234
99	1434325_x_at	19085	Prkar1b	protein kinase, cAMP dependent regulatory, type I beta	3	5.3596	5575	PRKAR1B	MGI:97759|Ensembl:ENSMUSG00000025855|Vega:OTTMUSG00000025121	5	protein-coding	23	31	5	59	52	20	0.735562	570	324	324	0.682173	0.682173
100	ILMN_1255211	211232	Cpne9	copine family member IX	2	4.81004	151835	CPNE9	MGI:2443052|Ensembl:ENSMUSG00000030270|Vega:OTTMUSG00000022223	6	protein-coding	1	3	0	4	0	0	0.570578	334	582	581	0.679552	0.679552
101	1427247_at	229791	D3Bwg0562e	DNA segment, Chr 3, Brigham & Women's Genetics 0562 expressed	0	5.65401	9890	LPPR4	MGI:106530|Ensembl:ENSMUSG00000044667|Vega:OTTMUSG00000023917	3	protein-coding	5	4	5	14	44	23	0.775967	605	310	310	0.678674	0.678674
102	1440371_at	245684	Cnksr2	connector enhancer of kinase suppressor of Ras 2	1	4.51445	22866	CNKSR2	MGI:2661175|Ensembl:ENSMUSG00000025658|Vega:OTTMUSG00000019390	X	protein-coding	0	10	2	12	19	8	0.619573	414	419	419	0.676987	0.676987
103	ILMN_2991930	72902	Spock3	sparc/osteonectin, cwcv and kazal-like domains proteoglycan 3	2	5.06936	50859	SPOCK3	MGI:1920152|Ensembl:ENSMUSG00000054162|Vega:OTTMUSG00000031630	8	protein-coding	1	3	0	4	9	5	0.60134	386	456	456	0.676711	0.676711
104	ILMN_1225704	20262	Stmn3	stathmin-like 3	1	6.47961	50861	STMN3	MGI:1277137|Ensembl:ENSMUSG00000027581|Vega:OTTMUSG00000016652	2	protein-coding	11	10	9	30	31	23	0.768626	599	310	310	0.676209	0.676209
105	1444020_at	330790	Hapln4	hyaluronan and proteoglycan link protein 4	1	4.51115	404037	HAPLN4	MGI:2679531|Ensembl:ENSMUSG00000007594	8	protein-coding	4	4	0	8	9	8	0.619119	413	419	419	0.676118	0.676118
106	ILMN_1243949	227325	Dner	delta/notch-like EGF-related receptor	2	5.99838	92737	DNER	MGI:2152889|Ensembl:ENSMUSG00000036766	1	protein-coding	7	5	0	12	47	19	0.711542	540	330	330	0.675115	0.675115
107	ILMN_2421411	329942	Csmd2	CUB and Sushi multiple domains 2	1	5.05634	114784	CSMD2	MGI:2386401	4	protein-coding	0	6	0	6	8	5	0.599795	384	456	456	0.674712	0.674712
108	ILMN_3119914	69539	Trnp1	TMF1-regulated nuclear protein 1	3	4.80103	388610	TRNP1	MGI:1916789|Ensembl:ENSMUSG00000056596|Vega:OTTMUSG00000011157	4	protein-coding	1	1	0	2	8	0	0.56951	329	582	581	0.672802	0.672802
109	1456478_at	70974	Pgm2l1	phosphoglucomutase 2-like 1	5	4.30508	283209	PGM2L1	MGI:1918224|Ensembl:ENSMUSG00000030729|Vega:OTTMUSG00000032728	7	protein-coding	0	1	0	1	8	4	0.590838	369	477	477	0.671854	0.671854
110	ILMN_1229256	207777	Bzrap1	benzodiazepine receptor associated protein 1	2	5.04993	9256	BZRAP1	MGI:2450877|Ensembl:ENSMUSG00000034156|Vega:OTTMUSG00000001438	11	protein-coding	1	3	3	7	6	5	0.599035	381	456	456	0.671697	0.671697
111	ILMN_2869623	76156	Fam131b	family with sequence similarity 131, member B	1	4.82694	9715	FAM131B	MGI:1923406|Ensembl:ENSMUSG00000029861|Vega:OTTMUSG00000033751	6	protein-coding	0	0	0	0	1	1	0.572583	339	543	543	0.670143	0.670143
112	ILMN_3136149	72393	Faim2	Fas apoptotic inhibitory molecule 2	2	5.54876	23017	FAIM2	MGI:1919643|Ensembl:ENSMUSG00000023011	15	protein-coding	4	16	3	23	29	14	0.658207	473	360	360	0.669796	0.669796
113	ILMN_2858666	20420	Shd	src homology 2 domain-containing transforming protein D	2	4.77789	56961	SHD	MGI:1099461|Ensembl:ENSMUSG00000039154	17	protein-coding	1	2	0	3	0	0	0.566764	326	582	581	0.668718	0.668718
114	ILMN_2620545	171469	Gpr37l1	G protein-coupled receptor 37-like 1	1	5.01325	9283	GPR37L1	MGI:1928503|Ensembl:ENSMUSG00000026424|Vega:OTTMUSG00000022102	1	protein-coding	1	2	1	4	10	5	0.594684	378	456	456	0.668661	0.668661
115	1417672_at	94229	Slc4a10	solute carrier family 4, sodium bicarbonate cotransporter-like, member 10	1	6.04536	57282	SLC4A10	MGI:2150150|Ensembl:ENSMUSG00000026904|Vega:OTTMUSG00000012738	2	protein-coding	12	6	4	22	36	26	0.829678	626	293	293	0.662323	0.662323
116	1429175_at	68027	Tmem178	transmembrane protein 178	5	4.1157	130733	TMEM178	MGI:1915277|Ensembl:ENSMUSG00000024245	17	protein-coding	1	0	0	1	0	0	0.564848	321	582	581	0.661856	0.661856
117	ILMN_2662264	76960	Bcas1	breast carcinoma amplified sequence 1	3	5.29035	8537	BCAS1	MGI:1924210|Ensembl:ENSMUSG00000013523|Vega:OTTMUSG00000016099	2	protein-coding	2	6	2	10	119	12	0.627554	431	378	378	0.657281	0.657281
118	ILMN_2675677	245468	Pnma3	paraneoplastic antigen MA3	1	5.31161	29944	PNMA3	MGI:2180565|Ensembl:ENSMUSG00000046287|Vega:OTTMUSG00000017702	X	protein-coding	2	3	0	5	82	13	0.630076	436	368	368	0.652032	0.652032
119	ILMN_1241161	73047	Camk2n2	calcium/calmodulin-dependent protein kinase II inhibitor 2	2	4.97301	94032	CAMK2N2	MGI:1920297|Ensembl:ENSMUSG00000051146|Vega:OTTMUSG00000028771	16	protein-coding	1	7	3	11	8	6	0.58991	368	441	441	0.64913	0.64913
120	1418588_at	22360	Nrsn1	neurensin 1	2	5.55658	140767	NRSN1	MGI:894662|Ensembl:ENSMUSG00000048978|Vega:OTTMUSG00000000740	13	protein-coding	5	4	0	9	105	27	0.762596	594	292	292	0.648862	0.648862
121	ILMN_2516974	76376	Slc24a2	solute carrier family 24 (sodium/potassium/calcium exchanger), member 2	2	7.27815	25769	SLC24A2	MGI:1923626|Ensembl:ENSMUSG00000037996|Vega:OTTMUSG00000007637	4	protein-coding	6	20	10	36	49	30	0.863351	635	282	282	0.64886	0.64886
122	ILMN_2822825	230904	Fbxo2	F-box protein 2	2	5.4211	26232	FBXO2	MGI:2446216|Ensembl:ENSMUSG00000041556|Vega:OTTMUSG00000010936	4	protein-coding	11	20	2	33	37	15	0.643064	456	350	350	0.648667	0.648667
123	1456741_s_at	234267	Gpm6a	glycoprotein m6a	5	6.27697	2823	GPM6A	MGI:107671|Ensembl:ENSMUSG00000031517	8	protein-coding	11	13	8	32	68	30	0.861464	634	282	282	0.64852	0.64852
124	ILMN_3015003	18190	Nrxn2	neurexin II	1	5.18326	9379	NRXN2	MGI:1096362|Ensembl:ENSMUSG00000033768|Vega:OTTMUSG00000018624	19	protein-coding	12	12	12	36	13	11	0.614851	409	388	388	0.648462	0.648462
125	ILMN_1231724	19711	Resp18	regulated endocrine-specific protein 18	2	5.24781	389075	RESP18	MGI:1098222|Ensembl:ENSMUSG00000033061|Vega:OTTMUSG00000024507	1	protein-coding	4	2	4	10	14	12	0.622507	419	378	378	0.648096	0.648096
126	ILMN_1233444	225583	A730017C20Rik	RIKEN cDNA A730017C20 gene	5	4.7115	100127206	KIAA1024L	MGI:2442934|Ensembl:ENSMUSG00000050875	18	protein-coding	0	0	0	0	0	0	0.558889	311	582	581	0.647917	0.647917
127	ILMN_2451529	72821	Scn2b	sodium channel, voltage-gated, type II, beta	1	5.39162	6327	SCN2B	MGI:106921|Ensembl:ENSMUSG00000070304	9	protein-coding	12	8	10	30	24	15	0.639567	454	350	350	0.647351	0.647351
128	1434641_x_at	233878	Sez6l2	seizure related 6 homolog like 2	4	4.29035	26470	SEZ6L2	MGI:2385295|Ensembl:ENSMUSG00000030683|Vega:OTTMUSG00000023164	7	protein-coding	2	5	0	7	31	6	0.588816	365	441	441	0.64609	0.64609
129	ILMN_1250379	116731	Pcdha1	protocadherin alpha 1	2	4.86948	56147	PCDHA1	MGI:2150982|Ensembl:ENSMUSG00000007440	18	protein-coding	7	3	2	12	5	4	0.57763	344	477	477	0.644193	0.644193
130	1433788_at	18191	Nrxn3	neurexin III	1	4.93025	9369	NRXN3	MGI:1096389|Ensembl:ENSMUSG00000066392|Vega:OTTMUSG00000035299	12	protein-coding	17	26	8	51	34	21	0.676638	505	318	318	0.642634	0.642634
131	ILMN_1232107	12069	Bex2	brain expressed X-linked 2	3	6.06675	84707	BEX2	MGI:1338017|Ensembl:ENSMUSG00000042750|Vega:OTTMUSG00000018777	X	protein-coding	7	12	2	21	41	25	0.719652	551	299	299	0.64082	0.64082
132	ILMN_1231762	268932	Caskin1	CASK interacting protein 1	3	4.89142	57524	CASKIN1	MGI:2442952|Ensembl:ENSMUSG00000033597	17	protein-coding	1	5	2	8	6	5	0.580232	351	456	456	0.640384	0.640384
133	1441369_at	383348	Kctd16	potassium channel tetramerisation domain containing 16	0	4.0897	57528	Kctd16	HGNC:29244|MIM:613423|Ensembl:ENSG00000183775|HPRD:17175|Vega:OTTHUMG00000163172	5	protein-coding	2	0	0	2	1	1	0.561278	314	543	543	0.63758	0.63758
134	ILMN_1233535	67412	6330407J23Rik	RIKEN cDNA 6330407J23 gene	1	4.68841	387104	C6orf174	MGI:1914662|Ensembl:ENSMUSG00000038916	10	protein-coding	0	0	0	0	0	0	0.55615	303	582	581	0.636555	0.636555
135	1417318_at	56710	Dbc1	deleted in bladder cancer 1 (human)	2	4.54622	1620	DBC1	MGI:1928478|Ensembl:ENSMUSG00000028351|Vega:OTTMUSG00000000310	4	protein-coding	6	24	3	33	70	14	0.623933	424	360	360	0.636021	0.636021
136	1439808_at	320495	Ipcef1	interaction protein for cytohesin exchange factors 1	4	4.07374	26034	IPCEF1	MGI:2444159|Ensembl:ENSMUSG00000064065|Vega:OTTMUSG00000022995	10	protein-coding	0	8	2	10	5	1	0.559088	312	543	543	0.634899	0.634899
137	ILMN_2510474	56191	Tro	trophinin	1	5.56357	7216	TRO	MGI:1928994|Ensembl:ENSMUSG00000025272|Vega:OTTMUSG00000019171	X	protein-coding	8	25	0	33	117	20	0.659963	478	324	324	0.634729	0.634729
138	ILMN_1223724	269610	Chd5	chromodomain helicase DNA binding protein 5	3	5.25466	26038	CHD5	MGI:3036258|Ensembl:ENSMUSG00000005045|Vega:OTTMUSG00000010576	4	protein-coding	3	16	1	20	34	14	0.62332	422	360	360	0.634557	0.634557
139	1435047_at	67295	Rab3c	RAB3C, member RAS oncogene family	4	4.93661	115827	RAB3C	MGI:1914545|Ensembl:ENSMUSG00000021700	13	protein-coding	17	5	6	28	39	23	0.67751	507	310	310	0.634061	0.634061
140	ILMN_1231837	211712	Pcdh9	protocadherin 9	1	5.24346	5101	PCDH9	MGI:1306801|Ensembl:ENSMUSG00000055421	14	protein-coding	6	4	1	11	17	14	0.621991	418	360	360	0.631608	0.631608
141	ILMN_1221763	17933	Myt1l	myelin transcription factor 1-like	1	6.06034	23040	MYT1L	MGI:1100511|Ensembl:ENSMUSG00000061911	12	protein-coding	9	9	4	22	36	26	0.718892	548	293	293	0.631464	0.631464
142	1429685_at	14401	Gabrb2	gamma-aminobutyric acid (GABA) A receptor, subunit beta 2	0	6.08782	2561	GABRB2	MGI:95620|Ensembl:ENSMUSG00000007653|Vega:OTTMUSG00000006331	11	protein-coding	38	62	26	126	43	32	0.835504	629	272	272	0.631348	0.631348
143	ILMN_1228470	57028	Pdxp	pyridoxal (pyridoxine, vitamin B6) phosphatase	2	5.07202	57026	PDXP	MGI:1919282|Ensembl:ENSMUSG00000068221	15	protein-coding	2	7	0	9	71	11	0.601655	387	388	388	0.630035	0.630035
144	1457743_at	52882	Rgs7bp	regulator of G-protein signalling 7 binding protein	1	5.2243	401190	RGS7BP	MGI:106334|Ensembl:ENSMUSG00000021719	13	protein-coding	14	6	0	20	30	26	0.716994	543	293	293	0.629298	0.629298
145	1437787_at	107065	Lrrtm2	leucine rich repeat transmembrane neuronal 2	0	4.31324	26045	LRRTM2	MGI:2389174|Ensembl:ENSMUSG00000071862	18	protein-coding	4	3	1	8	10	10	0.591958	373	401	401	0.62719	0.62719
146	ILMN_1233402	229521	Syt11	synaptotagmin XI	2	5.09989	23208	SYT11	MGI:1859547|Ensembl:ENSMUSG00000068923|Vega:OTTMUSG00000022625	3	protein-coding	5	8	2	15	17	12	0.604961	392	378	378	0.626439	0.626439
147	1435095_at	14400	Gabrb1	gamma-aminobutyric acid (GABA) A receptor, subunit beta 1	2	4.55795	2560	GABRB1	MGI:95619|Ensembl:ENSMUSG00000029212|Vega:OTTMUSG00000024372	5	protein-coding	26	33	19	78	32	16	0.625543	427	346	346	0.625176	0.625176
148	1426562_a_at	56177	Olfm1	olfactomedin 1	1	5.72921	10439	OLFM1	MGI:1860437|Ensembl:ENSMUSG00000026833|Vega:OTTMUSG00000011625	2	protein-coding	11	3	1	15	51	32	0.786289	610	272	272	0.625007	0.625007
149	1455883_a_at	74342	Lrrtm1	leucine rich repeat transmembrane neuronal 1	1	4.38496	347730	LRRTM1	MGI:2389173|Ensembl:ENSMUSG00000060780|Vega:OTTMUSG00000034534	6	protein-coding	7	9	1	17	16	12	0.6018	388	378	378	0.623108	0.623108
150	ILMN_1230224	72685	Dnajc6	DnaJ (Hsp40) homolog, subfamily C, member 6	4	5.4233	9829	DNAJC6	MGI:1919935|Ensembl:ENSMUSG00000028528|Vega:OTTMUSG00000008458	4	protein-coding	2	10	2	14	54	20	0.643324	457	324	324	0.622405	0.622405
151	1434582_at	238988	Erc2	ELKS/RAB6-interacting/CAST family member 2	4	4.73402	26059	ERC2	MGI:1098749|Ensembl:ENSMUSG00000040640	14	protein-coding	7	9	6	22	36	21	0.649706	468	318	318	0.622317	0.622317
152	1436912_at	12298	Cacnb4	calcium channel, voltage-dependent, beta 4 subunit	2	4.83321	785	CACNB4	MGI:103301|Ensembl:ENSMUSG00000017412|Vega:OTTMUSG00000012607	2	protein-coding	58	24	6	88	50	23	0.663319	483	310	310	0.621527	0.621527
153	1434759_at	216028	Lrrtm3	leucine rich repeat transmembrane neuronal 3	0	4.2626	347731	LRRTM3	MGI:2389177|Ensembl:ENSMUSG00000042846|Vega:OTTMUSG00000023795	10	protein-coding	4	6	0	10	9	9	0.585008	360	409	409	0.620479	0.620479
154	ILMN_2678366	74002	Psd2	pleckstrin and Sec7 domain containing 2	1	4.76212	84249	PSD2	MGI:1921252|Ensembl:ENSMUSG00000024347	18	protein-coding	2	0	0	2	7	4	0.564894	322	477	477	0.618514	0.618514
155	1435308_at	14348	Fut9	fucosyltransferase 9	2	4.82172	10690	FUT9	MGI:1330859|Ensembl:ENSMUSG00000055373|Vega:OTTMUSG00000004810	4	protein-coding	8	13	2	23	199	24	0.661742	481	304	304	0.613411	0.613411
156	ILMN_1254628	103978	Gpc5	glypican 5	0	5.05204	2262	GPC5	MGI:1194894|Ensembl:ENSMUSG00000022112	14	protein-coding	6	28	1	35	38	13	0.599285	382	368	368	0.610173	0.610173
157	1449563_at	12805	Cntn1	contactin 1	3	5.497	1272	CNTN1	MGI:105980|Ensembl:ENSMUSG00000055022|Vega:OTTMUSG00000014988	15	protein-coding	48	32	10	90	69	34	0.754419	584	266	266	0.606886	0.606886
158	1457092_at	320265	Fam19a1	family with sequence similarity 19, member A1	1	3.99723	407738	FAM19A1	MGI:2443695|Ensembl:ENSMUSG00000059187|Vega:OTTMUSG00000029712	6	protein-coding	1	2	0	3	2	1	0.548588	291	543	543	0.60602	0.60602
159	1434526_at	384214	Ephx4	epoxide hydrolase 4	2	3.972	253152	EPHX4	MGI:2686228|Ensembl:ENSMUSG00000033805|Vega:OTTMUSG00000023959	5	protein-coding	0	1	0	1	0	0	0.545125	282	582	581	0.6058	0.6058
160	ILMN_1258636	27062	Cadps	Ca2+-dependent secretion activator	1	6.07866	8618	CADPS	MGI:1350922|Ensembl:ENSMUSG00000054423	14	protein-coding	17	12	20	49	39	32	0.721064	552	272	272	0.60391	0.60391
161	ILMN_1245118	170711	Otud7a	OTU domain containing 7A	3	4.63261	161725	OTUD7A	MGI:2158505|Ensembl:ENSMUSG00000033510|Vega:OTTMUSG00000027290	7	protein-coding	2	1	0	3	2	2	0.549531	294	520	520	0.601542	0.601542
162	ILMN_1260082	233879	Asphd1	aspartate beta-hydroxylase domain containing 1	1	4.52641	253982	ASPHD1	MGI:2685014|Ensembl:ENSMUSG00000046378|Vega:OTTMUSG00000023163	7	protein-coding	0	1	0	1	0	0	0.536934	278	582	581	0.599784	0.599784
163	ILMN_2644415	23969	Pacsin1	protein kinase C and casein kinase substrate in neurons 1	1	6.33029	29993	PACSIN1	MGI:1345181|Ensembl:ENSMUSG00000040276|Vega:OTTMUSG00000021338	17	protein-coding	13	16	13	42	51	35	0.750914	579	262	262	0.599079	0.599079
164	ILMN_2696182	83766	Actl6b	actin-like 6B	1	4.81957	51412	ACTL6B	MGI:1933548|Ensembl:ENSMUSG00000029712|Vega:OTTMUSG00000021924	5	protein-coding	7	8	0	15	9	9	0.571708	338	409	409	0.598685	0.598685
165	ILMN_1226042	12889	Cplx1	complexin 1	1	8.43012	10815	CPLX1	MGI:104727|Ensembl:ENSMUSG00000033615|Vega:OTTMUSG00000028893	5	protein-coding	25	18	14	57	58	42	1	649	248	248	0.598311	0.598311
166	ILMN_1216675	11519	Add2	adducin 2 (beta)	1	5.58721	119	ADD2	MGI:87919|Ensembl:ENSMUSG00000030000	6	protein-coding	26	34	10	70	86	28	0.662768	482	289	289	0.595796	0.595796
167	1425092_at	320873	Cdh10	cadherin 10	2	4.17934	1008	CDH10	MGI:107436|Ensembl:ENSMUSG00000022321	15	protein-coding	10	9	1	20	16	10	0.573582	340	401	401	0.595646	0.595646
168	1457446_at	330908	Opcml	opioid binding protein/cell adhesion molecule-like	0	5.22958	4978	OPCML	MGI:97397|Ensembl:ENSMUSG00000062257|Vega:OTTMUSG00000024277	9	protein-coding	10	17	4	31	61	34	0.717717	545	266	266	0.592586	0.592586
169	1456392_at	320840	Negr1	neuronal growth regulator 1	4	4.65969	257194	NEGR1	MGI:2444846|Ensembl:ENSMUSG00000040037|Vega:OTTMUSG00000024007	3	protein-coding	4	25	2	31	57	25	0.639505	453	299	299	0.59245	0.59245
170	ILMN_1231336	16426	Itih3	inter-alpha trypsin inhibitor, heavy chain 3	1	4.73897	3699	ITIH3	MGI:96620|Ensembl:ENSMUSG00000006522|Vega:OTTMUSG00000035523	14	protein-coding	7	20	2	29	54	6	0.562147	315	441	441	0.592105	0.592105
171	ILMN_1221852	269695	Rnft2	ring finger protein, transmembrane 2	3	4.51739	84900	RNFT2	MGI:2442859|Ensembl:ENSMUSG00000032850|Vega:OTTMUSG00000028972	5	protein-coding	0	1	0	1	0	0	0.535864	272	582	581	0.590662	0.590662
172	ILMN_1234340	241727	Snph	syntaphilin	1	4.92499	9751	SNPH	MGI:2139270|Ensembl:ENSMUSG00000027457|Vega:OTTMUSG00000014818	2	protein-coding	3	2	5	10	22	13	0.584214	357	368	368	0.588801	0.588801
173	1423640_at	72003	Synpr	synaptoporin	3	4.69153	132204	SYNPR	MGI:1919253|Ensembl:ENSMUSG00000056296|Vega:OTTMUSG00000027769	14	protein-coding	3	4	2	9	27	26	0.643875	459	293	293	0.588776	0.588776
174	1436246_at	20418	Shc3	src homology 2 domain-containing transforming protein C3	0	4.68896	53358	SHC3	MGI:106179|Ensembl:ENSMUSG00000021448	13	protein-coding	23	27	5	55	29	26	0.643522	458	293	293	0.588241	0.588241
175	1426283_at	235106	Ntm	neurotrimin	2	4.58934	50863	NTM	MGI:2446259|Ensembl:ENSMUSG00000059974|Vega:OTTMUSG00000023155	9	protein-coding	4	6	5	15	62	24	0.62985	434	304	304	0.5871	0.5871
176	1456283_at	246317	Neto1	neuropilin (NRP) and tolloid (TLL)-like 1	0	4.30526	81832	NETO1	MGI:2180216|Ensembl:ENSMUSG00000050321	18	protein-coding	9	5	0	14	15	15	0.590862	370	350	350	0.585814	0.585814
177	ILMN_1216021	57776	Ttyh1	tweety homolog 1 (Drosophila)	1	5.9028	57348	TTYH1	MGI:1889007|Ensembl:ENSMUSG00000030428|Vega:OTTMUSG00000021913	7	protein-coding	7	3	1	11	107	34	0.700204	527	266	266	0.58553	0.58553
178	ILMN_2827217	232370	Clstn3	calsyntenin 3	4	4.96742	9746	CLSTN3	MGI:2178323|Ensembl:ENSMUSG00000008153|Vega:OTTMUSG00000022801	6	protein-coding	2	3	2	7	139	15	0.589247	367	350	350	0.583364	0.583364
179	1438007_at	268354	Fam19a2	family with sequence similarity 19, member A2	3	3.88804	338811	FAM19A2	MGI:2143691|Ensembl:ENSMUSG00000044071	10	protein-coding	2	2	0	4	2	0	0.533603	267	582	581	0.582969	0.582969
180	1418047_at	11922	Neurod6	neurogenic differentiation 6	1	5.23287	63974	NEUROD6	MGI:106593|Ensembl:ENSMUSG00000037984	6	protein-coding	105	4	3	112	41	37	0.71817	546	259	259	0.58277	0.58277
181	1455225_at	64009	Syne1	synaptic nuclear envelope 1	0	4.55281	23345	SYNE1	MGI:1927152|Ensembl:ENSMUSG00000019769	10	protein-coding	21	36	7	64	130	24	0.624837	426	304	304	0.5823	0.5823
182	ILMN_3161718	60597	Mapk8ip2	mitogen-activated protein kinase 8 interacting protein 2	2	5.80298	23542	MAPK8IP2	MGI:1926555|Ensembl:ENSMUSG00000022619|Vega:OTTMUSG00000032609	15	protein-coding	17	15	3	35	398	34	0.688363	516	266	266	0.581064	0.581064
183	1457423_at	338370	Nalcn	sodium leak channel, non-selective	3	4.24116	259232	NALCN	MGI:2444306|Ensembl:ENSMUSG00000000197	14	protein-coding	6	9	2	17	18	14	0.582065	354	360	360	0.580177	0.580177
184	1434800_at	64176	Sv2b	synaptic vesicle glycoprotein 2 b	2	5.06746	9899	SV2B	MGI:1927338|Ensembl:ENSMUSG00000053025	7	protein-coding	32	7	12	51	46	35	0.695469	523	262	262	0.57829	0.57829
185	1435060_at	50876	Tmod2	tropomodulin 2	4	4.08135	29767	TMOD2	MGI:1355335|Ensembl:ENSMUSG00000032186	9	protein-coding	3	3	1	7	9	8	0.560133	313	419	419	0.578015	0.578015
186	ILMN_2734160	229706	Slc6a17	solute carrier family 6 (neurotransmitter transporter), member 17	2	4.6643	388662	SLC6A17	MGI:2442535|Ensembl:ENSMUSG00000027894|Vega:OTTMUSG00000036634	3	protein-coding	1	2	0	3	8	6	0.55329	300	441	441	0.574582	0.574582
187	ILMN_2746664	59049	Slc22a17	solute carrier family 22 (organic cation transporter), member 17	2	4.69123	51310	SLC22A17	MGI:1926225|Ensembl:ENSMUSG00000022199	14	protein-coding	2	8	2	12	23	7	0.556484	305	428	428	0.573831	0.573831
188	1423091_a_at	14758	Gpm6b	glycoprotein m6b	5	4.39546	2824	GPM6B	MGI:107672|Ensembl:ENSMUSG00000031342|Vega:OTTMUSG00000019536	X	protein-coding	9	12	2	23	46	21	0.603242	391	318	318	0.573577	0.573577
189	ILMN_2856986	20255	Scg3	secretogranin III	1	5.57262	29106	SCG3	MGI:103032|Ensembl:ENSMUSG00000032181	9	protein-coding	11	16	8	35	53	32	0.661037	480	272	272	0.573376	0.573376
190	ILMN_1239134	72585	Lypd1	Ly6/Plaur domain containing 1	1	4.65121	116372	LYPD1	MGI:1919835|Ensembl:ENSMUSG00000026344|Vega:OTTMUSG00000030265	1	protein-coding	5	2	1	8	7	6	0.551737	298	441	441	0.572195	0.572195
191	1419225_at	12294	Cacna2d3	calcium channel, voltage-dependent, alpha2/delta subunit 3	2	4.12204	55799	CACNA2D3	MGI:1338890|Ensembl:ENSMUSG00000021991	14	protein-coding	6	8	2	16	21	11	0.565718	323	388	388	0.570335	0.570335
192	ILMN_3009184	11775	Ap3b2	adaptor-related protein complex 3, beta 2 subunit	2	4.90791	8120	AP3B2	MGI:1100869|Ensembl:ENSMUSG00000062444|Vega:OTTMUSG00000031672	7	protein-coding	9	13	0	22	26	17	0.582188	355	343	343	0.567852	0.567852
193	1457273_at	23964	Odz2	odd Oz/ten-m homolog 2 (Drosophila)	3	4.10723	57451	ODZ2	MGI:1345184|Ensembl:ENSMUSG00000049336|Vega:OTTMUSG00000005420	11	protein-coding	10	5	1	16	25	11	0.563685	319	388	388	0.566267	0.566267
194	ILMN_2758070	104001	Rtn1	reticulon 1	1	6.55852	6252	RTN1	MGI:1933947|Ensembl:ENSMUSG00000021087|Vega:OTTMUSG00000016329	12	protein-coding	11	27	4	42	61	47	0.777987	606	236	236	0.56612	0.56612
195	1447825_x_at	18530	Pcdh8	protocadherin 8	2	4.46015	5100	PCDH8	MGI:1306800|Ensembl:ENSMUSG00000036422	14	protein-coding	20	8	2	30	173	25	0.61212	407	299	299	0.565333	0.565333
196	ILMN_1214060	330485	Tmem145	transmembrane protein 145	1	4.45991	284339	TMEM145	MGI:3607779|Ensembl:ENSMUSG00000043843|Vega:OTTMUSG00000031920	7	protein-coding	0	0	0	0	0	0	0.529045	255	582	581	0.564159	0.564159
197	1434990_at	320472	Ppm1e	protein phosphatase 1E (PP2C domain containing)	4	3.97928	22843	PPM1E	MGI:2444096|Ensembl:ENSMUSG00000046442|Vega:OTTMUSG00000001239	11	protein-coding	0	7	5	12	14	5	0.546124	285	456	456	0.563172	0.563172
198	ILMN_1216662	16574	Kif5c	kinesin family member 5C	1	6.0001	3800	KIF5C	MGI:1098269|Ensembl:ENSMUSG00000026764|Vega:OTTMUSG00000012481	2	protein-coding	22	11	8	41	83	43	0.711745	541	244	244	0.558538	0.558538
199	ILMN_1233840	16560	Kif1a	kinesin family member 1A	3	6.39304	547	KIF1A	MGI:108391|Ensembl:ENSMUSG00000014602	1	protein-coding	16	20	0	36	91	50	0.758358	589	234	234	0.557915	0.557915
200	1456609_at	66259	Camk2n1	calcium/calmodulin-dependent protein kinase II inhibitor 1	5	3.9912	55450	CAMK2N1	MGI:1913509|Ensembl:ENSMUSG00000046447|Vega:OTTMUSG00000010002	4	protein-coding	4	3	4	11	11	7	0.547761	290	428	428	0.556265	0.556265
201	ILMN_1259339	12569	Cdk5r1	cyclin-dependent kinase 5, regulatory subunit 1 (p35)	1	5.74402	8851	CDK5R1	MGI:101764|Ensembl:ENSMUSG00000048895|Vega:OTTMUSG00000000218	11	protein-coding	107	70	35	212	47	41	0.681369	510	250	250	0.556089	0.556089
202	ILMN_1249809	56533	Rgs17	regulator of G-protein signaling 17	0	4.8756	26575	RGS17	MGI:1927469|Ensembl:ENSMUSG00000019775|Vega:OTTMUSG00000027502	10	protein-coding	5	13	1	19	32	18	0.578356	346	337	337	0.555593	0.555593
203	1419420_at	26938	St6galnac5	ST6 (alpha-N-acetyl-neuraminyl-2,3-beta-galactosyl-1,3)-N-acetylgalactosaminide alpha-2,6-sialyltransferase 5	2	3.97568	81849	ST6GALNAC5	MGI:1349471|Ensembl:ENSMUSG00000039037|Vega:OTTMUSG00000030537	3	protein-coding	3	4	0	7	14	6	0.54563	284	441	441	0.555144	0.555144
204	ILMN_2598374	215707	Ccdc92	coiled-coil domain containing 92	3	4.40914	80212	CCDC92	MGI:106485|Ensembl:ENSMUSG00000037979|Vega:OTTMUSG00000024484	5	protein-coding	1	1	0	2	1	0	0.523022	249	582	581	0.554566	0.554566
205	1433785_at	17433	Mobp	myelin-associated oligodendrocytic basic protein	0	6.15839	4336	MOBP	MGI:108511|Ensembl:ENSMUSG00000032517|Vega:OTTMUSG00000037099	9	protein-coding	15	7	3	25	57	54	0.84519	630	225	225	0.553651	0.553651
206	ILMN_1241332	320772	Mdga2	MAM domain containing glycosylphosphatidylinositol anchor 2	2	4.5093	161357	MDGA2	MGI:2444706|Ensembl:ENSMUSG00000034912	12	protein-coding	4	11	2	17	9	4	0.534904	271	477	477	0.553578	0.553578
207	1434270_at	73340	Nptxr	neuronal pentraxin receptor	1	4.25573	23467	NPTXR	MGI:1920590|Ensembl:ENSMUSG00000022421|Vega:OTTMUSG00000034820	15	protein-coding	6	5	5	16	33	20	0.584065	356	324	324	0.55306	0.55306
208	ILMN_1231405	26562	Ncdn	neurochondrin	0	4.8369	23154	NCDN	MGI:1347351|Ensembl:ENSMUSG00000028833|Vega:OTTMUSG00000009274	4	protein-coding	10	7	3	20	19	18	0.573765	342	337	337	0.552227	0.552227
209	1421882_a_at	15569	Elavl2	ELAV (embryonic lethal, abnormal vision, Drosophila)-like 2 (Hu antigen B)	5	4.81119	1993	ELAVL2	MGI:1100887|Ensembl:ENSMUSG00000008489|Vega:OTTMUSG00000007821	4	protein-coding	19	11	3	33	53	40	0.660297	479	254	254	0.549102	0.549102
210	1433707_at	14397	Gabra4	gamma-aminobutyric acid (GABA) A receptor, subunit alpha 4	2	4.34124	2557	GABRA4	MGI:95616|Ensembl:ENSMUSG00000029211	5	protein-coding	29	20	21	70	32	25	0.5958	379	299	299	0.547114	0.547114
211	ILMN_2645133	104885	Tmem179	transmembrane protein 179	2	4.39228	388021	TMEM179	MGI:2144891|Ensembl:ENSMUSG00000054013	12	protein-coding	0	0	0	0	0	0	0.521022	243	582	581	0.544843	0.544843
212	1435204_at	381813	Prmt8	protein arginine N-methyltransferase 8	3	3.94965	56341	PRMT8	MGI:3043083|Ensembl:ENSMUSG00000030350|Vega:OTTMUSG00000020414	6	protein-coding	7	6	0	13	14	7	0.542058	280	428	428	0.544168	0.544168
213	ILMN_2994995	213469	Lgi3	leucine-rich repeat LGI family, member 3	3	4.69746	203190	LGI3	MGI:2182619|Ensembl:ENSMUSG00000033595	14	protein-coding	9	4	1	14	13	13	0.557224	307	368	368	0.541593	0.541593
214	ILMN_2502275	269642	Nat8l	N-acetyltransferase 8-like	0	4.63629	339983	NAT8L	MGI:2447776|Ensembl:ENSMUSG00000048142	5	protein-coding	8	6	2	16	14	11	0.549968	295	388	388	0.540917	0.540917
215	ILMN_2923671	245670	Rragb	Ras-related GTP binding B	2	4.4224	10325	RRAGB	MGI:3038613|Ensembl:ENSMUSG00000041658|Vega:OTTMUSG00000019332	X	protein-coding	1	7	3	11	26	2	0.524595	250	520	520	0.538603	0.538603
216	1434295_at	19419	Rasgrp1	RAS guanyl releasing protein 1	2	4.38837	10125	RASGRP1	MGI:1314635|Ensembl:ENSMUSG00000027347|Vega:OTTMUSG00000015228	2	protein-coding	40	27	5	72	184	30	0.602268	389	282	282	0.536385	0.536385
217	1437442_at	54216	Pcdh7	protocadherin 7	5	3.9872	5099	PCDH7	MGI:1860487|Ensembl:ENSMUSG00000029108	5	protein-coding	6	4	1	11	15	11	0.547211	288	388	388	0.533206	0.533206
218	ILMN_3131846	215090	Maneal	mannosidase, endo-alpha-like	1	4.38886	149175	MANEAL	MGI:2684896|Ensembl:ENSMUSG00000042763|Vega:OTTMUSG00000009200	4	protein-coding	0	0	0	0	2	1	0.520616	242	543	543	0.533077	0.533077
219	1435387_at	239606	Slc2a13	solute carrier family 2 (facilitated glucose transporter), member 13	4	3.96855	114134	SLC2A13	MGI:2146030|Ensembl:ENSMUSG00000036298|Vega:OTTMUSG00000020865	15	protein-coding	2	5	3	10	19	10	0.544652	281	401	401	0.532129	0.532129
220	1436076_at	224997	Dlgap1	discs, large (Drosophila) homolog-associated protein 1	1	5.37318	9229	DLGAP1	MGI:1346065|Ensembl:ENSMUSG00000003279|Vega:OTTMUSG00000033115	17	protein-coding	12	20	16	48	95	59	0.737426	572	220	220	0.529728	0.529728
221	1425898_x_at	229759	Olfm3	olfactomedin 3	4	3.89213	118427	OLFM3	MGI:2387329|Ensembl:ENSMUSG00000027965|Vega:OTTMUSG00000026597	3	protein-coding	4	3	2	9	12	7	0.534164	268	428	428	0.529224	0.529224
222	1455358_at	268859	Rbfox1	RNA binding protein, fox-1 homolog (C. elegans) 1	5	4.62645	54715	RBFOX1	MGI:1926224|Ensembl:ENSMUSG00000008658	16	protein-coding	16	26	1	43	80	41	0.634943	442	250	250	0.527381	0.527381
223	1436237_at	69480	Ttc9	tetratricopeptide repeat domain 9	5	3.78387	23508	TTC9	MGI:1916730|Ensembl:ENSMUSG00000042734	12	protein-coding	2	2	0	4	3	1	0.519306	237	543	543	0.525158	0.525158
224	ILMN_1251416	20404	Sh3gl2	SH3-domain GRB2-like 2	3	5.34325	6456	SH3GL2	MGI:700009|Ensembl:ENSMUSG00000028488|Vega:OTTMUSG00000007959	4	protein-coding	21	48	12	81	68	42	0.633829	441	248	248	0.524329	0.524329
225	ILMN_2769234	18217	Ntsr2	neurotensin receptor 2	1	6.11002	23620	NTSR2	MGI:108018|Ensembl:ENSMUSG00000020591	12	protein-coding	16	16	0	32	69	60	0.724785	556	219	219	0.523528	0.523528
226	ILMN_3090378	18163	Ctnnd2	catenin (cadherin associated protein), delta 2	1	4.9999	1501	CTNND2	MGI:1195966|Ensembl:ENSMUSG00000022240	15	protein-coding	19	34	2	55	45	31	0.5931	375	278	278	0.523479	0.523479
227	1426852_x_at	18133	Nov	nephroblastoma overexpressed gene	5	4.21018	4856	NOV	MGI:109185|Ensembl:ENSMUSG00000037362|Vega:OTTMUSG00000033259	15	protein-coding	22	56	11	89	163	25	0.577813	345	299	299	0.522971	0.522971
228	ILMN_1214188	13483	Dpp6	dipeptidylpeptidase 6	1	5.63278	1804	DPP6	MGI:94921|Ensembl:ENSMUSG00000061576|Vega:OTTMUSG00000029575	5	protein-coding	32	29	8	69	82	52	0.668173	491	231	231	0.521248	0.521248
229	ILMN_2622190	239157	Pnma2	paraneoplastic antigen MA2	0	5.47656	10687	PNMA2	MGI:2444129|Ensembl:ENSMUSG00000046204|Vega:OTTMUSG00000035206	14	protein-coding	0	6	0	6	67	47	0.649643	467	236	236	0.519267	0.519267
230	1417428_at	14704	Gng3	guanine nucleotide binding protein (G protein), gamma 3	5	3.85533	2785	GNG3	MGI:102704|Ensembl:ENSMUSG00000071658	19	protein-coding	15	17	3	35	6	6	0.529113	256	441	441	0.519128	0.519128
231	1435968_at	19276	Ptprn2	protein tyrosine phosphatase, receptor type, N polypeptide 2	3	4.26711	5799	PTPRN2	MGI:107418|Ensembl:ENSMUSG00000056553	12	protein-coding	24	13	7	44	134	30	0.585627	362	282	282	0.519062	0.519062
232	ILMN_2690014	20983	Syt4	synaptotagmin IV	1	6.15382	6860	SYT4	MGI:101759|Ensembl:ENSMUSG00000024261	18	protein-coding	27	8	22	57	76	63	0.72998	563	214	214	0.517102	0.517102
233	1456885_at	20362	Sept8	septin 8	2	4.06239	23176	SEPT8	MGI:894310|Ensembl:ENSMUSG00000018398|Vega:OTTMUSG00000005635	11	protein-coding	7	13	2	22	84	19	0.55753	308	330	330	0.517097	0.517097
234	ILMN_1221160	208898	Unc13c	unc-13 homolog C (C. elegans)	2	4.48131	440279	UNC13C	MGI:2149021|Ensembl:ENSMUSG00000062151	9	protein-coding	10	3	2	15	9	9	0.531584	265	409	409	0.51685	0.51685
235	1454768_at	382571	Kcnf1	potassium voltage-gated channel, subfamily F, member 1	3	3.9067	3754	KCNF1	MGI:2687399|Ensembl:ENSMUSG00000051726|Vega:OTTMUSG00000037668	12	protein-coding	0	3	1	4	42	12	0.536163	274	378	378	0.512079	0.512079
236	ILMN_2666205	269109	Dpp10	dipeptidylpeptidase 10	0	4.77664	57628	DPP10	MGI:2442409|Ensembl:ENSMUSG00000036815|Vega:OTTMUSG00000020794	1	protein-coding	3	31	9	43	59	24	0.566617	324	304	304	0.510951	0.510951
237	ILMN_2776095	106763	Ttbk1	tau tubulin kinase 1	3	4.43734	84630	TTBK1	MGI:2147036|Ensembl:ENSMUSG00000015599	17	protein-coding	2	5	0	7	9	7	0.526368	253	428	428	0.509854	0.509854
238	1435767_at	235281	Scn3b	sodium channel, voltage-gated, type III, beta	4	3.80238	55800	SCN3B	MGI:1918882|Ensembl:ENSMUSG00000049281|Vega:OTTMUSG00000016755	9	protein-coding	10	16	8	34	21	5	0.521846	245	456	456	0.509801	0.509801
239	ILMN_2724785	16498	Kcnab2	potassium voltage-gated channel, shaker-related subfamily, beta member 2	4	4.70713	8514	KCNAB2	MGI:109239|Ensembl:ENSMUSG00000028931|Vega:OTTMUSG00000033817	4	protein-coding	14	10	10	34	31	22	0.558371	309	317	317	0.508501	0.508501
240	1427481_a_at	232975	Atp1a3	ATPase, Na+/K+ transporting, alpha 3 polypeptide	1	4.90201	478	ATP1A3	MGI:88107|Ensembl:ENSMUSG00000040907|Vega:OTTMUSG00000016491	7	protein-coding	32	35	12	79	75	56	0.672762	497	221	221	0.508286	0.508286
241	ILMN_2643495	235180	Fez1	fasciculation and elongation protein zeta 1 (zygin I)	2	5.28634	9638	FEZ1	MGI:2670976|Ensembl:ENSMUSG00000032118|Vega:OTTMUSG00000034186	9	protein-coding	5	26	10	41	74	45	0.627078	430	239	239	0.50758	0.50758
242	1455444_at	14395	Gabra2	gamma-aminobutyric acid (GABA) A receptor, subunit alpha 2	0	4.6281	2555	GABRA2	MGI:95614|Ensembl:ENSMUSG00000000560	5	protein-coding	59	60	22	141	85	51	0.635169	443	233	233	0.505233	0.505233
243	1434877_at	18164	Nptx1	neuronal pentraxin 1	1	5.66987	4884	NPTX1	MGI:107811|Ensembl:ENSMUSG00000025582|Vega:OTTMUSG00000003985	11	protein-coding	13	5	6	24	178	71	0.778144	607	201	201	0.505084	0.505084
244	1439755_at	217692	Sipa1l1	signal-induced proliferation-associated 1 like 1	3	3.76214	26037	SIPA1L1	MGI:2443679|Ensembl:ENSMUSG00000042700	12	protein-coding	3	6	14	23	26	2	0.516324	227	520	520	0.502975	0.502975
245	ILMN_2879195	194237	Rimkla	ribosomal modification protein rimK-like family member A	3	4.36018	284716	RIMKLA	MGI:3040686|Ensembl:ENSMUSG00000048899|Vega:OTTMUSG00000009424	4	protein-coding	3	2	0	5	4	3	0.517215	230	498	498	0.501453	0.501453
246	1447771_at	243961	Shank1	SH3/ankyrin domain gene 1	1	4.55247	50944	SHANK1	MGI:3613677|Ensembl:ENSMUSG00000038738|Vega:OTTMUSG00000016443	7	protein-coding	13	20	26	59	49	47	0.62479	425	236	236	0.501388	0.501388
247	1420965_a_at	13803	Enc1	ectodermal-neural cortex 1	3	4.07152	8507	ENC1	MGI:109610|Ensembl:ENSMUSG00000041773	13	protein-coding	8	14	3	25	105	24	0.558783	310	304	304	0.499409	0.499409
248	ILMN_3142097	56527	Mast1	microtubule associated serine/threonine kinase 1	1	4.38394	22983	MAST1	MGI:1861901|Ensembl:ENSMUSG00000053693|Vega:OTTMUSG00000029992	8	protein-coding	4	5	2	11	44	6	0.520033	240	441	441	0.497311	0.497311
249	ILMN_3125814	216739	Acsl6	acyl-CoA synthetase long-chain family member 6	4	4.60696	23305	ACSL6	MGI:894291|Ensembl:ENSMUSG00000020333|Vega:OTTMUSG00000005668	11	protein-coding	6	15	14	35	49	19	0.546488	287	330	330	0.497274	0.497274
250	ILMN_2756226	382018	Unc13a	unc-13 homolog A (C. elegans)	1	5.97026	23025	UNC13A	MGI:3051532|Ensembl:ENSMUSG00000034799	8	protein-coding	25	8	32	65	93	69	0.708207	536	205	205	0.494442	0.494442
251	1443612_at	228432	Ano3	anoctamin 3	0	3.76411	63982	ANO3	MGI:3613666|Ensembl:ENSMUSG00000074968|Vega:OTTMUSG00000015134	2	protein-coding	2	6	0	8	11	4	0.516594	229	477	477	0.493572	0.493572
252	ILMN_2738123	26913	Gprin1	G protein-regulated inducer of neurite outgrowth 1	1	5.64079	114787	GPRIN1	MGI:1349455|Ensembl:ENSMUSG00000069227|Vega:OTTMUSG00000032670	13	protein-coding	4	2	0	6	71	64	0.669124	493	212	212	0.492976	0.492976
253	1416688_at	20616	Snap91	synaptosomal-associated protein 91	5	4.76788	9892	SNAP91	MGI:109132|Ensembl:ENSMUSG00000033419	9	protein-coding	10	20	12	42	111	62	0.654353	471	216	216	0.491674	0.491674
254	1454832_at	218194	Phactr1	phosphatase and actin regulator 1	5	3.75006	221692	PHACTR1	MGI:2659021|Ensembl:ENSMUSG00000054728|Vega:OTTMUSG00000023876	13	protein-coding	4	16	1	21	22	3	0.514666	222	498	498	0.488987	0.488987
255	ILMN_1246139	18417	Cldn11	claudin 11	3	6.13248	5010	CLDN11	MGI:106925|Ensembl:ENSMUSG00000037625|Vega:OTTMUSG00000022650	3	protein-coding	43	25	3	71	129	75	0.727449	561	198	198	0.488853	0.488853
256	1420955_at	26950	Vsnl1	visinin-like 1	2	6.71767	7447	VSNL1	MGI:1349453|Ensembl:ENSMUSG00000054459	12	protein-coding	10	33	12	55	111	84	0.921947	645	188	188	0.488207	0.488207
257	ILMN_1252953	12404	Cbln1	cerebellin 1 precursor protein	1	5.28277	869	CBLN1	MGI:88281|Ensembl:ENSMUSG00000031654	8	protein-coding	45	9	7	61	61	55	0.626655	429	223	223	0.485649	0.485649
258	ILMN_2659896	18231	Nxph1	neurexophilin 1	1	4.61726	30010	NXPH1	MGI:107492|Ensembl:ENSMUSG00000046178|Vega:OTTMUSG00000034245	6	protein-coding	6	13	2	21	53	23	0.547711	289	310	310	0.485452	0.485452
259	1417005_at	16593	Klc1	kinesin light chain 1	2	4.84302	3831	KLC1	MGI:107978|Ensembl:ENSMUSG00000021288|Vega:OTTMUSG00000027507	12	protein-coding	38	36	19	93	162	67	0.664665	488	208	208	0.485062	0.485062
260	ILMN_1255126	54418	Fmn2	formin 2	1	4.45905	56776	FMN2	MGI:1859252|Ensembl:ENSMUSG00000028354	1	protein-coding	14	9	0	23	35	13	0.528943	254	368	368	0.483802	0.483802
261	ILMN_1260389	22342	Lin7b	lin-7 homolog B (C. elegans)	2	4.37869	64130	LIN7B	MGI:1330858|Ensembl:ENSMUSG00000003872|Vega:OTTMUSG00000016518	7	protein-coding	13	15	3	31	15	9	0.51941	238	409	409	0.482226	0.482226
262	1435604_at	68729	Trim37	tripartite motif-containing 37	2	3.91191	4591	TRIM37	MGI:2153072|Ensembl:ENSMUSG00000018548|Vega:OTTMUSG00000001222	11	protein-coding	3	16	1	20	99	21	0.536879	277	318	318	0.479616	0.479616
263	1460449_at	77531	Anks1b	ankyrin repeat and sterile alpha motif domain containing 1B	2	5.11147	56899	ANKS1B	MGI:1924781|Ensembl:ENSMUSG00000058589	10	protein-coding	1	21	0	22	321	76	0.701508	530	197	197	0.479183	0.479183
264	1430667_at	18526	Pcdh10	protocadherin 10	2	4.26387	57575	PCDH10	MGI:1338042|Ensembl:ENSMUSG00000049100	3	protein-coding	6	17	0	23	63	43	0.585182	361	244	244	0.478591	0.478591
265	1418105_at	56471	Stmn4	stathmin-like 4	2	4.19843	81551	STMN4	MGI:1931224|Ensembl:ENSMUSG00000022044|Vega:OTTMUSG00000027814	14	protein-coding	1	3	6	10	75	40	0.5762	343	254	254	0.478523	0.478523
266	1419672_at	20745	Spock1	sparc/osteonectin, cwcv and kazal-like domains proteoglycan 1	2	4.10486	6695	SPOCK1	MGI:105371|Ensembl:ENSMUSG00000056222	13	protein-coding	12	15	0	27	87	32	0.56336	316	272	272	0.477347	0.477347
267	1452065_at	211739	Vstm2a	V-set and transmembrane domain containing 2A	3	4.66854	222008	VSTM2A	MGI:2384826|Ensembl:ENSMUSG00000048834|Vega:OTTMUSG00000005182	11	protein-coding	0	0	0	0	241	65	0.64072	455	210	210	0.476981	0.476981
268	ILMN_3048728	216439	Agap2	ArfGAP with GTPase domain, ankyrin repeat and PH domain 2	1	4.37095	116986	AGAP2	MGI:3580016|Ensembl:ENSMUSG00000025422	10	protein-coding	9	29	8	46	24	9	0.518492	234	409	409	0.476867	0.476867
269	ILMN_1253093	83767	Wasf1	WASP family 1	3	5.00534	8936	WASF1	MGI:1890563|Ensembl:ENSMUSG00000019831|Vega:OTTMUSG00000020871	10	protein-coding	30	51	3	84	151	50	0.593745	376	234	234	0.475176	0.475176
270	ILMN_2664455	30052	Pcsk1n	proprotein convertase subtilisin/kexin type 1 inhibitor	2	4.80573	27344	PCSK1N	MGI:1353431|Ensembl:ENSMUSG00000039278|Vega:OTTMUSG00000018013	X	protein-coding	13	6	9	28	65	38	0.570067	330	257	257	0.473108	0.473108
271	1436821_at	239318	Plcxd3	phosphatidylinositol-specific phospholipase C, X domain containing 3	5	3.69391	345557	PLCXD3	MGI:2442605|Ensembl:ENSMUSG00000049148|Vega:OTTMUSG00000027967	15	protein-coding	0	0	0	0	0	0	0.50696	201	582	581	0.472941	0.472941
272	ILMN_2668236	100503659	Dos	downstream of Stk11	4	4.27223	255057	C19orf26	MGI:1354170|Ensembl:ENSMUSG00000035640|Vega:OTTMUSG00000000007	10	protein-coding	2	0	0	2	1	0	0.506782	200	582	581	0.471143	0.471143
273	1452766_at	72948	Tppp	tubulin polymerization promoting protein	3	4.23908	11076	TPPP	MGI:1920198|Ensembl:ENSMUSG00000021573|Vega:OTTMUSG00000027757	13	protein-coding	6	30	3	39	58	45	0.58178	353	239	239	0.46844	0.46844
274	ILMN_2480963	17391	Mmp24	matrix metallopeptidase 24	1	4.50672	10893	MMP24	MGI:1341867|Ensembl:ENSMUSG00000027612|Vega:OTTMUSG00000016131	2	protein-coding	12	12	0	24	84	23	0.534598	269	310	310	0.466545	0.466545
275	1455258_at	268345	Kcnc2	potassium voltage gated channel, Shaw-related subfamily, member 2	1	4.22379	3747	KCNC2	MGI:96668|Ensembl:ENSMUSG00000035681	10	protein-coding	19	5	11	35	60	45	0.579682	349	239	239	0.466139	0.466139
276	1459971_at	240776	Kcnt2	potassium channel, subfamily T, member 2	3	3.74795	343450	KCNT2	MGI:3036273|Ensembl:ENSMUSG00000052726|Vega:OTTMUSG00000029830	1	protein-coding	1	4	5	10	11	7	0.514376	221	428	428	0.465752	0.465752
277	ILMN_2695158	16581	Kifc2	kinesin family member C2	1	4.33081	90990	KIFC2	MGI:109187|Ensembl:ENSMUSG00000004187	15	protein-coding	8	2	1	11	8	6	0.513731	218	441	441	0.465709	0.465709
278	1436329_at	13655	Egr3	early growth response 3	1	5.48422	1960	EGR3	MGI:1306780|Ensembl:ENSMUSG00000033730	14	protein-coding	38	23	3	64	185	89	0.752665	581	182	182	0.464107	0.464107
279	1420545_a_at	108699	Chn1	chimerin (chimaerin) 1	2	5.59916	1123	CHN1	MGI:1915674|Ensembl:ENSMUSG00000056486|Vega:OTTMUSG00000013428	2	protein-coding	10	23	0	33	315	91	0.76844	598	180	180	0.463708	0.463708
280	1434670_at	16572	Kif5a	kinesin family member 5A	0	6.49147	3798	KIF5A	MGI:109564|Ensembl:ENSMUSG00000074657	10	protein-coding	34	35	9	78	189	94	0.890902	644	175	175	0.462132	0.462132
281	1435256_at	76686	Clip3	CAP-GLY domain containing linker protein 3	4	3.68622	25999	CLIP3	MGI:1923936|Ensembl:ENSMUSG00000013921|Vega:OTTMUSG00000024314	7	protein-coding	2	5	0	7	8	1	0.505905	199	543	543	0.461756	0.461756
282	ILMN_1224770	67298	Gprasp1	G protein-coupled receptor associated sorting protein 1	3	4.33219	9737	GPRASP1	MGI:1917418|Ensembl:ENSMUSG00000043384|Vega:OTTMUSG00000018754	X	protein-coding	5	15	5	25	14	8	0.513894	220	419	419	0.461187	0.461187
283	ILMN_2732430	67792	Rgs8	regulator of G-protein signaling 8	1	4.42568	85397	RGS8	MGI:108408|Ensembl:ENSMUSG00000042671|Vega:OTTMUSG00000021608	1	protein-coding	5	11	5	21	38	19	0.524985	251	330	330	0.460165	0.460165
284	1457032_at	229949	Ak5	adenylate kinase 5	0	3.70656	26289	AK5	MGI:2677491|Ensembl:ENSMUSG00000039058	3	protein-coding	0	3	0	3	21	4	0.508696	206	477	477	0.457822	0.457822
285	1454691_at	18189	Nrxn1	neurexin I	2	5.85264	9378	NRXN1	MGI:1096391|Ensembl:ENSMUSG00000024109|Vega:OTTMUSG00000034567	17	protein-coding	37	64	33	134	113	94	0.803229	618	175	175	0.457649	0.457649
286	ILMN_3161828	19337	Rab33a	RAB33A, member of RAS oncogene family	4	4.2891	9363	RAB33A	MGI:109493|Ensembl:ENSMUSG00000031104|Vega:OTTMUSG00000017541	X	protein-coding	2	6	2	10	16	5	0.508783	207	456	456	0.453578	0.453578
287	ILMN_2648098	14270	Srgap2	SLIT-ROBO Rho GTPase activating protein 2	1	4.5254	23380	SRGAP2	MGI:109605|Ensembl:ENSMUSG00000026425	1	protein-coding	7	10	1	18	63	30	0.536813	276	282	282	0.453337	0.453337
288	1460214_at	18546	Pcp4	Purkinje cell protein 4	3	4.64258	5121	PCP4	MGI:97509|Ensembl:ENSMUSG00000090223|Vega:OTTMUSG00000020445	16	protein-coding	28	7	9	44	102	78	0.637157	448	196	196	0.453212	0.453212
289	1437631_at	80334	Kcnip4	Kv channel interacting protein 4	2	3.89655	80333	KCNIP4	MGI:1933131|Ensembl:ENSMUSG00000029088	5	protein-coding	8	14	6	28	65	29	0.53477	270	288	288	0.45238	0.45238
290	1437855_at	17758	Mtap4	microtubule-associated protein 4	2	5.34861	4134	MAP4	MGI:97178|Ensembl:ENSMUSG00000032479|Vega:OTTMUSG00000035845	9	protein-coding	15	32	1	48	180	93	0.734054	569	177	177	0.452173	0.452173
291	1419392_at	26875	Pclo	piccolo (presynaptic cytomatrix protein)	2	4.84017	27445	PCLO	MGI:1349390|Ensembl:ENSMUSG00000061601	5	protein-coding	12	16	8	36	366	84	0.664275	485	188	188	0.451613	0.451613
292	1436889_at	14394	Gabra1	gamma-aminobutyric acid (GABA) A receptor, subunit alpha 1	1	6.98429	2554	GABRA1	MGI:95613|Ensembl:ENSMUSG00000010803|Vega:OTTMUSG00000005445	11	protein-coding	123	87	84	294	125	98	0.958537	648	169	169	0.45051	0.45051
293	1434672_at	73010	Gpr22	G protein-coupled receptor 22	2	3.68337	2845	GPR22	MGI:1920260|Ensembl:ENSMUSG00000044067|Vega:OTTMUSG00000022806	12	protein-coding	1	5	1	7	8	3	0.505514	198	498	498	0.45	0.45
294	1444077_at	207227	Stxbp5l	syntaxin binding protein 5-like	1	3.66416	9515	STXBP5L	MGI:2443815|Ensembl:ENSMUSG00000022829|Vega:OTTMUSG00000024758	16	protein-coding	5	3	0	8	6	2	0.502876	194	520	520	0.448162	0.448162
295	1435190_at	12661	Chl1	cell adhesion molecule with homology to L1CAM	4	4.34485	10752	CHL1	MGI:1098266|Ensembl:ENSMUSG00000030077	6	protein-coding	39	19	0	58	97	66	0.596296	380	209	209	0.445653	0.445653
296	1460482_at	319807	3110047P20Rik	RIKEN cDNA 3110047P20 gene	3	3.64592	57495	KIAA1239	MGI:1920464|Ensembl:ENSMUSG00000090061|Vega:OTTMUSG00000030847	5	protein-coding	0	0	0	0	3	0	0.500374	186	582	581	0.445509	0.445509
297	ILMN_2995549	231605	Galnt9	UDP-N-acetyl-alpha-D-galactosamine:polypeptide N-acetylgalactosaminyltransferase 9	3	4.23094	50614	GALNT9	MGI:2677965|Ensembl:ENSMUSG00000033316	5	protein-coding	0	2	0	2	3	2	0.501884	192	520	520	0.44469	0.44469
298	1429113_at	69017	Prrt2	proline-rich transmembrane protein 2	2	3.73788	112476	PRRT2	MGI:1916267|Ensembl:ENSMUSG00000045114|Vega:OTTMUSG00000033189	7	protein-coding	1	22	1	24	104	11	0.512994	216	388	388	0.444242	0.444242
299	ILMN_1236725	14559	Gdf1	growth differentiation factor 1	5	4.46482	2657	GDF1	MGI:95683|Ensembl:ENSMUSG00000055694	8	protein-coding	25	10	1	36	238	26	0.529627	257	293	293	0.443633	0.443633
300	1433474_at	13612	Edil3	EGF-like repeats and discoidin I-like domains 3	5	4.12945	10085	EDIL3	MGI:1329025|Ensembl:ENSMUSG00000034488|Vega:OTTMUSG00000027759	13	protein-coding	19	11	0	30	279	52	0.566734	325	231	231	0.443255	0.443255
301	1433607_at	228942	Cbln4	cerebellin 4 precursor protein	2	3.73331	140689	CBLN4	MGI:2154433|Ensembl:ENSMUSG00000067578|Vega:OTTMUSG00000016162	2	protein-coding	15	8	0	23	13	11	0.512368	215	388	388	0.442867	0.442867
302	ILMN_2604070	107934	Celsr3	cadherin, EGF LAG seven-pass G-type receptor 3 (flamingo homolog, Drosophila)	2	5.13165	1951	CELSR3	MGI:1858236|Ensembl:ENSMUSG00000023473	9	protein-coding	21	3	4	28	195	72	0.608729	401	199	199	0.440718	0.440718
303	1450863_a_at	13175	Dclk1	doublecortin-like kinase 1	2	5.28997	9201	DCLK1	MGI:1330861|Ensembl:ENSMUSG00000027797	3	protein-coding	34	30	12	76	365	96	0.726006	559	172	172	0.440635	0.440635
304	ILMN_2672708	237253	Lrp11	low density lipoprotein receptor-related protein 11	4	4.21851	84918	LRP11	MGI:2442989|Ensembl:ENSMUSG00000019796|Vega:OTTMUSG00000032764	10	protein-coding	0	0	0	0	3	1	0.50041	187	543	543	0.440473	0.440473
305	1440902_at	77767	Ermn	ermin, ERM-like protein	1	3.7058	57471	ERMN	MGI:1925017|Ensembl:ENSMUSG00000026830|Vega:OTTMUSG00000012597	2	protein-coding	1	5	4	10	9	8	0.508592	204	419	419	0.437828	0.437828
306	ILMN_2649333	238323	Rps6kl1	ribosomal protein S6 kinase-like 1	3	4.1882	83694	RPS6KL1	MGI:2443413|Ensembl:ENSMUSG00000019235	12	protein-coding	0	0	0	0	0	0	0.496814	181	582	581	0.436145	0.436145
307	ILMN_2900962	14545	Gdap1	ganglioside-induced differentiation-associated-protein 1	2	5.67724	54332	GDAP1	MGI:1338002|Ensembl:ENSMUSG00000025777|Vega:OTTMUSG00000022300	1	protein-coding	2	47	1	50	105	93	0.673448	498	177	177	0.436139	0.436139
308	1425518_at	56508	Rapgef4	Rap guanine nucleotide exchange factor (GEF) 4	5	3.86546	11069	RAPGEF4	MGI:1917723|Ensembl:ENSMUSG00000049044|Vega:OTTMUSG00000013137	2	protein-coding	25	24	7	56	110	31	0.530503	259	278	278	0.435188	0.435188
309	ILMN_2813724	230775	Bai2	brain-specific angiogenesis inhibitor 2	2	4.29535	576	BAI2	MGI:2451244|Ensembl:ENSMUSG00000028782|Vega:OTTMUSG00000009519	4	protein-coding	4	10	0	14	12	11	0.509524	208	388	388	0.433124	0.433124
310	ILMN_1221429	56772	Mllt11	myeloid/lymphoid or mixed-lineage leukemia (trithorax homolog, Drosophila); translocated to, 11	4	4.21506	10962	MLLT11	MGI:1929671|Ensembl:ENSMUSG00000053192|Vega:OTTMUSG00000021997	3	protein-coding	3	8	1	12	31	2	0.5	185	520	520	0.432394	0.432394
311	1427288_at	11784	Apba2	amyloid beta (A4) precursor protein-binding, family A, member 2	0	4.10594	321	APBA2	MGI:1261791|Ensembl:ENSMUSG00000030519|Vega:OTTMUSG00000023522	7	protein-coding	19	33	7	59	123	54	0.563508	317	225	225	0.432008	0.432008
312	ILMN_1243596	235604	Camkv	CaM kinase-like vesicle-associated	1	4.22172	79012	CAMKV	MGI:2384296|Ensembl:ENSMUSG00000032936	9	protein-coding	0	1	1	2	34	4	0.500791	189	477	477	0.429933	0.429933
313	1424248_at	74100	Arpp21	cyclic AMP-regulated phosphoprotein, 21	1	5.17731	10777	ARPP21	MGI:107562|Ensembl:ENSMUSG00000032503|Vega:OTTMUSG00000034741	9	protein-coding	7	5	4	16	113	99	0.710545	539	167	167	0.427065	0.427065
314	1435974_at	236915	Arhgef9	CDC42 guanine nucleotide exchange factor (GEF) 9	1	3.87203	23229	ARHGEF9	MGI:2442233|Ensembl:ENSMUSG00000025656|Vega:OTTMUSG00000018030	X	protein-coding	8	14	8	30	51	36	0.531405	263	261	261	0.4261	0.4261
315	1455516_at	77771	Csrnp3	cysteine-serine-rich nuclear protein 3	5	3.61995	80034	CSRNP3	MGI:1925021|Ensembl:ENSMUSG00000044647|Vega:OTTMUSG00000012965	2	protein-coding	3	3	0	6	1	1	0.496809	179	543	543	0.425923	0.425923
316	1439777_at	14007	Celf2	CUGBP, Elav-like family member 2	4	3.80411	10659	CELF2	MGI:1338822|Ensembl:ENSMUSG00000002107|Vega:OTTMUSG00000011788	2	protein-coding	16	23	5	44	78	30	0.522083	246	282	282	0.425668	0.425668
317	ILMN_2718406	328778	Rab26	RAB26, member RAS oncogene family	4	4.20079	25837	RAB26	MGI:2443284|Ensembl:ENSMUSG00000079657	17	protein-coding	1	5	2	8	9	3	0.498308	182	498	498	0.422601	0.422601
318	1448978_at	53972	Ngef	neuronal guanine nucleotide exchange factor	4	3.7051	25791	NGEF	MGI:1858414|Ensembl:ENSMUSG00000026259|Vega:OTTMUSG00000036755	1	protein-coding	11	7	3	21	15	12	0.508496	203	378	378	0.422468	0.422468
319	ILMN_1226356	270097	Vat1l	vesicle amine transport protein 1 homolog-like (T. californica)	5	4.13997	57687	VAT1L	MGI:2142534|Ensembl:ENSMUSG00000046844|Vega:OTTMUSG00000031710	8	protein-coding	1	1	0	2	0	0	0.491093	173	582	581	0.420925	0.420925
320	ILMN_2933022	27276	Plekhb1	pleckstrin homology domain containing, family B (evectins) member 1	4	4.33118	58473	PLEKHB1	MGI:1351469|Ensembl:ENSMUSG00000030701|Vega:OTTMUSG00000025179	7	protein-coding	7	4	2	13	50	21	0.513775	219	318	318	0.417492	0.417492
321	ILMN_3160137	11676	Aldoc	aldolase C, fructose-bisphosphate	1	6.1475	230	ALDOC	MGI:101863|Ensembl:ENSMUSG00000017390|Vega:OTTMUSG00000000108	11	protein-coding	29	16	24	69	116	105	0.72923	562	159	159	0.415896	0.415896
322	ILMN_1229634	57775	Usp29	ubiquitin specific peptidase 29	1	4.2192	57663	USP29	MGI:1888998	7	protein-coding	12	2	0	14	19	7	0.500491	188	428	428	0.415835	0.415835
323	ILMN_2486818	54126	Arhgef7	Rho guanine nucleotide exchange factor (GEF7)	1	4.95761	8874	ARHGEF7	MGI:1860493|Ensembl:ENSMUSG00000031511|Vega:OTTMUSG00000021108	8	protein-coding	33	62	16	111	220	83	0.588083	364	191	191	0.41452	0.41452
324	ILMN_1238436	12890	Cplx2	complexin 2	1	4.66225	10814	CPLX2	MGI:104726|Ensembl:ENSMUSG00000025867|Vega:OTTMUSG00000032656	13	protein-coding	28	22	17	67	90	61	0.553047	299	217	217	0.412542	0.412542
325	ILMN_1222844	217843	Unc79	unc-79 homolog (C. elegans)	3	4.16065	57578	UNC79	MGI:2684729|Ensembl:ENSMUSG00000021198|Vega:OTTMUSG00000037136	12	protein-coding	5	4	0	9	3	3	0.493546	175	498	498	0.410236	0.410236
326	ILMN_2760105	50914	Olig1	oligodendrocyte transcription factor 1	0	7.40424	116448	OLIG1	MGI:1355334|Ensembl:ENSMUSG00000046160|Vega:OTTMUSG00000019872	16	protein-coding	75	15	6	96	116	113	0.878308	642	150	150	0.409481	0.409481
327	1435033_at	226970	Arhgef4	Rho guanine nucleotide exchange factor (GEF) 4	4	3.59859	50649	ARHGEF4	MGI:2442507|Ensembl:ENSMUSG00000037509|Vega:OTTMUSG00000033276	1	protein-coding	4	13	0	17	24	4	0.493878	177	477	477	0.409442	0.409442
328	ILMN_2684397	378937	Lrrc24	leucine rich repeat containing 24	3	4.12454	441381	LRRC24	MGI:3605040|Ensembl:ENSMUSG00000033707|Vega:OTTMUSG00000033518	15	protein-coding	2	1	0	3	0	0	0.489262	167	582	581	0.409314	0.409314
329	1436719_at	215085	Slc35f1	solute carrier family 35, member F1	4	3.57006	222553	SLC35F1	MGI:2139810|Ensembl:ENSMUSG00000038602|Vega:OTTMUSG00000023982	10	protein-coding	0	6	0	6	3	1	0.489963	169	543	543	0.407314	0.407314
330	1422504_at	14658	Glrb	glycine receptor, beta subunit	3	5.31975	2743	GLRB	MGI:95751|Ensembl:ENSMUSG00000028020|Vega:OTTMUSG00000024419	3	protein-coding	44	22	12	78	151	112	0.730094	564	154	154	0.40622	0.40622
331	1450910_at	67252	Cap2	CAP, adenylate cyclase-associated protein, 2 (yeast)	5	3.63296	10486	CAP2	MGI:1914502|Ensembl:ENSMUSG00000021373|Vega:OTTMUSG00000029305	13	protein-coding	4	4	0	8	50	8	0.498595	183	419	419	0.405426	0.405426
332	1456570_at	54357	Epb4.1l4b	erythrocyte protein band 4.1-like 4b	4	3.80949	54566	EPB41L4B	MGI:1859149|Ensembl:ENSMUSG00000028434|Vega:OTTMUSG00000007315	4	protein-coding	4	4	0	8	109	41	0.522822	248	250	250	0.404782	0.404782
333	1456527_at	94253	Hecw1	HECT, C2 and WW domain containing E3 ubiquitin protein ligase 1	2	3.58015	23072	HECW1	MGI:2444115|Ensembl:ENSMUSG00000021301	13	protein-coding	2	7	0	9	21	4	0.491347	174	477	477	0.404211	0.404211
334	ILMN_2743902	17179	Matk	megakaryocyte-associated tyrosine kinase	3	4.43008	4145	MATK	MGI:99259|Ensembl:ENSMUSG00000004933|Vega:OTTMUSG00000030346	10	protein-coding	16	27	3	46	281	44	0.525507	252	243	243	0.402711	0.402711
335	1428460_at	20965	Syn2	synapsin II	1	4.57265	6854	SYN2	MGI:103020|Ensembl:ENSMUSG00000009394	6	protein-coding	69	25	7	101	105	99	0.62756	432	167	167	0.401497	0.401497
336	ILMN_1227650	12386	Ctnna2	catenin (cadherin associated protein), alpha 2	2	4.34183	1496	CTNNA2	MGI:88275|Ensembl:ENSMUSG00000063063|Vega:OTTMUSG00000034530	6	protein-coding	51	10	0	61	100	31	0.515038	224	278	278	0.401023	0.401023
337	1425180_at	73094	Sgip1	SH3-domain GRB2-like (endophilin) interacting protein 1	4	3.57771	84251	SGIP1	MGI:1920344|Ensembl:ENSMUSG00000028524|Vega:OTTMUSG00000008057	4	protein-coding	5	7	3	15	13	5	0.491012	172	456	456	0.396245	0.396245
338	ILMN_2813712	52906	Ahi1	Abelson helper integration site 1	4	4.47023	54806	AHI1	MGI:87971|Ensembl:ENSMUSG00000019986	10	protein-coding	26	34	4	64	549	54	0.530269	258	225	225	0.392332	0.392332
339	1448443_at	20713	Serpini1	serine (or cysteine) peptidase inhibitor, clade I, member 1	3	4.93384	5274	SERPINI1	MGI:1194506|Ensembl:ENSMUSG00000027834|Vega:OTTMUSG00000021878	3	protein-coding	17	29	8	54	132	113	0.67713	506	150	150	0.387902	0.387902
340	1438305_at	116837	Rims1	regulating synaptic membrane exocytosis 1	2	4.50782	22999	RIMS1	MGI:2152971|Ensembl:ENSMUSG00000041670	1	protein-coding	39	20	15	74	135	102	0.618663	412	162	162	0.387472	0.387472
341	ILMN_2698880	210027	Slc35f3	solute carrier family 35, member F3	2	4.08062	148641	SLC35F3	MGI:2444426|Ensembl:ENSMUSG00000057060|Vega:OTTMUSG00000029955	8	protein-coding	0	0	0	0	1	1	0.484053	158	543	543	0.386281	0.386281
342	ILMN_1253304	20257	Stmn2	stathmin-like 2	1	5.85864	11075	STMN2	MGI:98241|Ensembl:ENSMUSG00000027500	3	protein-coding	72	30	17	119	147	131	0.694965	522	147	147	0.384935	0.384935
343	ILMN_1237219	24012	Rgs7	regulator of G protein signaling 7	3	4.47486	6000	RGS7	MGI:1346089|Ensembl:ENSMUSG00000026527	1	protein-coding	19	22	7	48	101	63	0.530818	260	214	214	0.383796	0.383796
344	ILMN_2603450	18377	Omg	oligodendrocyte myelin glycoprotein	1	6.58565	4974	OMG	MGI:106586|Ensembl:ENSMUSG00000049612|Vega:OTTMUSG00000000194	11	protein-coding	17	16	4	37	148	146	0.781205	608	139	139	0.381149	0.381149
345	ILMN_2468981	276952	Rasl10b	RAS-like, family 10, member B	2	4.08231	91608	RASL10B	MGI:2685575|Ensembl:ENSMUSG00000020684|Vega:OTTMUSG00000000933	11	protein-coding	1	2	0	3	5	3	0.484253	159	498	498	0.381067	0.381067
346	1455603_at	17968	Ncam2	neural cell adhesion molecule 2	4	3.76189	4685	NCAM2	MGI:97282|Ensembl:ENSMUSG00000022762|Vega:OTTMUSG00000014960	16	protein-coding	26	11	1	38	54	43	0.516289	226	244	244	0.380747	0.380747
347	1429443_at	74020	Cpne4	copine IV	2	3.52169	131034	CPNE4	MGI:1921270|Ensembl:ENSMUSG00000032564|Vega:OTTMUSG00000023466	9	protein-coding	3	4	0	7	2	1	0.483323	155	543	543	0.380439	0.380439
348	1435857_s_at	11803	Aplp1	amyloid beta (A4) precursor-like protein 1	3	4.64526	333	APLP1	MGI:88046|Ensembl:ENSMUSG00000006651	7	protein-coding	28	35	2	65	129	113	0.637525	449	150	150	0.376027	0.376027
349	1435895_at	268890	Lsamp	limbic system-associated membrane protein	2	3.78508	4045	LSAMP	MGI:1261760|Ensembl:ENSMUSG00000061080|Vega:OTTMUSG00000016989	16	protein-coding	12	9	3	24	64	56	0.519472	239	221	221	0.374221	0.374221
350	ILMN_2703948	57340	Jph3	junctophilin 3	0	4.53455	57338	JPH3	MGI:1891497|Ensembl:ENSMUSG00000025318|Vega:OTTMUSG00000036743	8	protein-coding	7	19	1	27	1922	82	0.537899	279	192	192	0.373678	0.373678
351	1433602_at	110886	Gabra5	gamma-aminobutyric acid (GABA) A receptor, subunit alpha 5	1	3.80723	2558	GABRA5	MGI:95617|Ensembl:ENSMUSG00000055078	7	protein-coding	52	23	18	93	84	64	0.522512	247	212	212	0.372572	0.372572
352	1433888_at	11941	Atp2b2	ATPase, Ca++ transporting, plasma membrane 2	1	4.84051	491	ATP2B2	MGI:105368|Ensembl:ENSMUSG00000030302|Vega:OTTMUSG00000018967	6	protein-coding	65	38	26	129	419	138	0.664321	486	144	144	0.372432	0.372432
353	ILMN_2915671	16497	Kcnab1	potassium voltage-gated channel, shaker-related subfamily, beta member 1	3	4.31005	7881	KCNAB1	MGI:109155|Ensembl:ENSMUSG00000027827|Vega:OTTMUSG00000034877	3	protein-coding	12	20	10	42	68	41	0.511268	213	250	250	0.372374	0.372374
354	ILMN_1234234	239420	Csmd3	CUB and Sushi multiple domains 3	2	4.07354	114788	CSMD3	MGI:2386403|Ensembl:ENSMUSG00000022311|Vega:OTTMUSG00000033335	15	protein-coding	2	7	0	9	6	3	0.483212	154	498	498	0.371681	0.371681
355	1437195_x_at	26414	Mapk10	mitogen-activated protein kinase 10	3	5.81711	5602	MAPK10	MGI:1346863|Ensembl:ENSMUSG00000046709|Vega:OTTMUSG00000016343	5	protein-coding	56	59	14	129	248	159	0.798352	616	134	134	0.371099	0.371099
356	1423183_at	56839	Lgi1	leucine-rich repeat LGI family, member 1	0	4.99158	9211	LGI1	MGI:1861691|Ensembl:ENSMUSG00000067242|Vega:OTTMUSG00000016342	19	protein-coding	15	44	9	68	156	145	0.685054	514	140	140	0.369505	0.369505
357	1418317_at	16870	Lhx2	LIM homeobox protein 2	4	3.97948	9355	LHX2	MGI:96785|Ensembl:ENSMUSG00000000247|Vega:OTTMUSG00000012866	2	protein-coding	184	9	2	195	223	88	0.546152	286	184	184	0.368539	0.368539
358	ILMN_2652711	20972	Syngr1	synaptogyrin 1	1	4.08611	9145	SYNGR1	MGI:1328323|Ensembl:ENSMUSG00000022415|Vega:OTTMUSG00000016389	15	protein-coding	4	9	2	15	11	8	0.484704	160	419	419	0.367452	0.367452
359	ILMN_2481113	98366	Smap1	stromal membrane-associated protein 1	4	4.02618	60682	SMAP1	MGI:2138261|Ensembl:ENSMUSG00000026155|Vega:OTTMUSG00000026521	1	protein-coding	2	4	0	6	14	1	0.477594	148	543	543	0.366628	0.366628
360	ILMN_2433119	54525	Syt7	synaptotagmin VII	3	4.28374	9066	SYT7	MGI:1859545|Ensembl:ENSMUSG00000024743	19	protein-coding	27	10	19	56	78	37	0.508148	202	259	259	0.366561	0.366561
361	ILMN_2741277	84704	Snurf	SNRPN upstream reading frame	2	4.92652	8926	SNURF	MGI:1891236	7	protein-coding	11	13	2	26	424	105	0.584395	358	159	159	0.365836	0.365836
362	1456606_a_at	58250	Chst11	carbohydrate sulfotransferase 11	5	4.01623	50515	CHST11	MGI:1927166|Ensembl:ENSMUSG00000034612|Vega:OTTMUSG00000027827	10	protein-coding	16	14	1	31	927	93	0.551196	297	177	177	0.365786	0.365786
363	ILMN_2592953	20394	Scg5	secretogranin V	2	6.16903	6447	SCG5	MGI:98289|Ensembl:ENSMUSG00000023236|Vega:OTTMUSG00000019161	2	protein-coding	33	20	4	57	246	159	0.731784	567	134	134	0.364934	0.364934
364	1423343_at	58807	Slco1c1	solute carrier organic anion transporter family, member 1c1	1	3.80038	53919	SLCO1C1	MGI:1889679|Ensembl:ENSMUSG00000030235|Vega:OTTMUSG00000021195	6	protein-coding	7	18	13	38	321	69	0.521572	244	205	205	0.364035	0.364035
365	ILMN_2761430	270192	Rab6b	RAB6B, member RAS oncogene family	1	5.67959	51560	RAB6B	MGI:107283|Ensembl:ENSMUSG00000032549	9	protein-coding	3	6	0	9	575	151	0.673726	499	138	138	0.362927	0.362927
366	1428118_at	235402	Lingo1	leucine rich repeat and Ig domain containing 1	1	3.90497	84894	LINGO1	MGI:1915522|Ensembl:ENSMUSG00000049556|Vega:OTTMUSG00000016697	9	protein-coding	16	34	3	53	100	88	0.535926	273	184	184	0.361344	0.361344
367	ILMN_2595600	19894	Rph3a	rabphilin 3A	1	4.24083	22895	RPH3A	MGI:102788|Ensembl:ENSMUSG00000029608	5	protein-coding	22	16	19	57	60	35	0.503057	195	262	262	0.360636	0.360636
368	1454687_at	238205	Lrfn5	leucine rich repeat and fibronectin type III domain containing 5	2	3.50306	145581	LRFN5	MGI:2144814|Ensembl:ENSMUSG00000035653|Vega:OTTMUSG00000027631	12	protein-coding	3	4	0	7	6	6	0.480767	152	441	441	0.357961	0.357961
369	ILMN_2724044	104069	Sncb	synuclein, beta	1	6.67367	6620	SNCB	MGI:1889011|Ensembl:ENSMUSG00000034891|Vega:OTTMUSG00000032668	13	protein-coding	16	41	22	79	182	170	0.791647	612	128	128	0.357173	0.357173
370	ILMN_1236009	12323	Camk2b	calcium/calmodulin-dependent protein kinase II, beta	3	5.1046	816	CAMK2B	MGI:88257|Ensembl:ENSMUSG00000057897|Vega:OTTMUSG00000005105	11	protein-coding	42	52	23	117	325	133	0.60552	395	146	146	0.355714	0.355714
371	ILMN_2442740	217480	Dgkb	diacylglycerol kinase, beta	0	4.59575	1607	DGKB	MGI:2442474|Ensembl:ENSMUSG00000036095	12	protein-coding	7	11	5	23	375	95	0.545158	283	174	174	0.355091	0.355091
372	ILMN_2762925	56808	Cacna2d2	calcium channel, voltage-dependent, alpha 2/delta subunit 2	4	4.12264	9254	CACNA2D2	MGI:1929813|Ensembl:ENSMUSG00000010066|Vega:OTTMUSG00000036844	9	protein-coding	27	9	4	40	46	18	0.489038	166	337	337	0.355008	0.355008
373	ILMN_1227100	231380	Uba6	ubiquitin-like modifier activating enzyme 6	2	3.98809	55236	UBA6	MGI:1913894|Ensembl:ENSMUSG00000035898|Vega:OTTMUSG00000025609	5	protein-coding	3	10	0	13	10	0	0.473076	140	582	581	0.35488	0.35488
374	ILMN_1244829	15114	Hap1	huntingtin-associated protein 1	5	4.48037	9001	HAP1	MGI:1261831|Ensembl:ENSMUSG00000006930|Vega:OTTMUSG00000006280	11	protein-coding	27	25	18	70	239	89	0.531472	264	182	182	0.353942	0.353942
375	ILMN_2739825	13426	Dync1i1	dynein cytoplasmic 1 intermediate chain 1	3	4.09593	1780	DYNC1I1	MGI:107743|Ensembl:ENSMUSG00000029757|Vega:OTTMUSG00000023538	6	protein-coding	29	21	5	55	39	17	0.485869	161	343	343	0.349349	0.349349
376	ILMN_2592150	66797	Cntnap2	contactin associated protein-like 2	2	4.77885	26047	CNTNAP2	MGI:1914047|Ensembl:ENSMUSG00000039419|Vega:OTTMUSG00000022414	6	protein-coding	22	47	0	69	124	111	0.566878	327	155	155	0.348852	0.348852
377	ILMN_2925923	381677	Vgf	VGF nerve growth factor inducible	1	5.10305	7425	VGF	MGI:1343180|Ensembl:ENSMUSG00000037428	5	protein-coding	14	13	13	40	192	143	0.605335	393	142	142	0.348253	0.348253
378	ILMN_2732491	106014	Fam19a5	family with sequence similarity 19, member A5	2	3.9892	25817	FAM19A5	MGI:2146182|Ensembl:ENSMUSG00000054863	15	protein-coding	3	2	1	6	4	4	0.473208	143	477	477	0.347434	0.347434
379	ILMN_2549929	54160	Copg2	coatomer protein complex, subunit gamma 2	2	4.04826	26958	COPG2	MGI:1858683|Ensembl:ENSMUSG00000025607	6	protein-coding	5	17	0	22	25	10	0.480214	150	401	401	0.346288	0.346288
380	ILMN_1250280	94217	Lrp1b	low density lipoprotein-related protein 1B (deleted in tumors)	1	4.0778	53353	LRP1B	MGI:2151136|Ensembl:ENSMUSG00000049252|Vega:OTTMUSG00000012311	2	protein-coding	7	20	0	27	54	16	0.483718	157	346	346	0.344059	0.344059
381	1451045_at	80976	Syt13	synaptotagmin XIII	3	3.44337	57586	SYT13	MGI:1933945|Ensembl:ENSMUSG00000027220|Vega:OTTMUSG00000014492	2	protein-coding	5	4	1	10	6	2	0.472575	138	520	520	0.34363	0.34363
382	ILMN_2860699	13829	Epb4.9	erythrocyte protein band 4.9	4	3.98847	2039	EPB49	MGI:99670|Ensembl:ENSMUSG00000022099	14	protein-coding	18	13	0	31	47	4	0.473122	141	477	477	0.343591	0.343591
383	ILMN_2670486	12032	Bcan	brevican	1	4.80727	63827	BCAN	MGI:1096385|Ensembl:ENSMUSG00000004892	3	protein-coding	16	15	11	42	140	113	0.570249	333	150	150	0.343508	0.343508
384	1460365_a_at	13429	Dnm1	dynamin 1	2	4.18059	1759	DNM1	MGI:107384|Ensembl:ENSMUSG00000026825|Vega:OTTMUSG00000012945	2	protein-coding	52	99	53	204	283	122	0.573753	341	148	148	0.343118	0.343118
385	1437618_x_at	64450	Gpr85	G protein-coupled receptor 85	4	3.45805	54329	GPR85	MGI:1927851|Ensembl:ENSMUSG00000048216|Vega:OTTMUSG00000022773	6	protein-coding	5	6	2	13	22	8	0.47459	146	419	419	0.342945	0.342945
386	1417050_at	67445	C1qtnf4	C1q and tumor necrosis factor related protein 4	5	3.43869	114900	C1QTNF4	MGI:1914695|Ensembl:ENSMUSG00000040794|Vega:OTTMUSG00000014316	2	protein-coding	1	1	0	2	2	0	0.471932	134	582	581	0.342273	0.342273
387	ILMN_2602902	11932	Atp1b2	ATPase, Na+/K+ transporting, beta 2 polypeptide	5	4.12937	482	ATP1B2	MGI:88109|Ensembl:ENSMUSG00000041329|Vega:OTTMUSG00000005985	11	protein-coding	33	28	6	67	42	28	0.489836	168	289	289	0.340514	0.340514
388	ILMN_2812240	140723	Cacng5	calcium channel, voltage-dependent, gamma subunit 5	1	3.98314	27091	CACNG5	MGI:2157946|Ensembl:ENSMUSG00000040373|Vega:OTTMUSG00000003104	11	protein-coding	5	6	4	15	4	3	0.472489	137	498	498	0.33876	0.33876
389	1421152_a_at	14681	Gnao1	guanine nucleotide binding protein, alpha O	3	4.00938	2775	GNAO1	MGI:95775|Ensembl:ENSMUSG00000031748|Vega:OTTMUSG00000034033	8	protein-coding	72	60	34	166	183	110	0.550255	296	156	156	0.338013	0.338013
390	1418357_at	15228	Foxg1	forkhead box G1	1	5.32739	2290	FOXG1	MGI:1347464|Ensembl:ENSMUSG00000020950|Vega:OTTMUSG00000021132	12	protein-coding	269	36	5	310	491	188	0.731142	566	121	121	0.336231	0.336231
391	ILMN_2943972	72865	Cxx1c	CAAX box 1 homolog C (human)	5	3.96624	8933	FAM127A	MGI:1920115|Ensembl:ENSMUSG00000051851	X	protein-coding	1	3	0	4	3	0	0.470484	131	582	581	0.335897	0.335897
392	1436066_at	545156	Kalrn	kalirin, RhoGEF kinase	0	6.36226	8997	KALRN	MGI:2685385|Ensembl:ENSMUSG00000061751|Vega:OTTMUSG00000017795	16	protein-coding	11	32	21	64	2053	201	0.87317	641	117	117	0.334544	0.334544
393	1448991_a_at	226180	Ina	internexin neuronal intermediate filament protein, alpha	4	4.91666	9118	INA	MGI:96568|Ensembl:ENSMUSG00000034336|Vega:OTTMUSG00000016340	19	protein-coding	22	16	7	45	188	184	0.674773	501	124	124	0.334398	0.334398
394	1416286_at	19736	Rgs4	regulator of G-protein signaling 4	4	4.448	5999	RGS4	MGI:108409|Ensembl:ENSMUSG00000038530|Vega:OTTMUSG00000020909	1	protein-coding	37	94	29	160	375	165	0.610452	403	132	132	0.332671	0.332671
395	1427044_a_at	218038	Amph	amphiphysin	2	4.80213	273	AMPH	MGI:103574|Ensembl:ENSMUSG00000021314	13	protein-coding	14	52	23	89	324	181	0.659054	475	125	125	0.33254	0.33254
396	ILMN_2718030	109676	Ank2	ankyrin 2, brain	4	4.222	287	ANK2	MGI:88025|Ensembl:ENSMUSG00000032826	3	protein-coding	44	46	0	90	136	55	0.500823	190	223	223	0.332161	0.332161
397	1455374_at	16519	Kcnj3	potassium inwardly-rectifying channel, subfamily J, member 3	2	4.63663	3760	KCNJ3	MGI:104742|Ensembl:ENSMUSG00000026824|Vega:OTTMUSG00000015447	2	protein-coding	37	31	21	89	284	173	0.63634	446	127	127	0.331677	0.331677
398	ILMN_1239445	76980	Ube2ql1	ubiquitin-conjugating enzyme E2Q family-like 1	2	3.95749	134111	UBE2QL1	MGI:1924230|Ensembl:ENSMUSG00000052981	13	protein-coding	0	0	0	0	1	0	0.469447	129	582	581	0.33162	0.33162
399	1426345_at	213760	Prepl	prolyl endopeptidase-like	5	3.4405	9581	PREPL	MGI:2441932|Ensembl:ENSMUSG00000024127	17	protein-coding	1	8	0	9	20	5	0.472181	135	456	456	0.328865	0.328865
400	1435957_at	110862	Kcnq3	potassium voltage-gated channel, subfamily Q, member 3	0	4.97708	3786	KCNQ3	MGI:1336181|Ensembl:ENSMUSG00000056258	15	protein-coding	17	51	18	86	217	190	0.683064	512	120	120	0.327373	0.327373
401	ILMN_3162180	407812	Zfp941	zinc finger protein 941	3	3.95084			MGI:3039601|Ensembl:ENSMUSG00000060314|Vega:OTTMUSG00000022510	7	protein-coding	0	0	0	0	0	0	0.468657	127	582	581	0.32732	0.32732
402	ILMN_1238295	320587	Tmem88b	transmembrane protein 88B	0	3.94174	643965	TMEM88B	MGI:2444329|Ensembl:ENSMUSG00000073680|Vega:OTTMUSG00000010852	4	protein-coding	0	0	0	0	0	0	0.467578	126	582	581	0.325161	0.325161
403	ILMN_2730293	18574	Pde1b	phosphodiesterase 1B, Ca2+-calmodulin dependent	5	4.05255	5153	PDE1B	MGI:97523|Ensembl:ENSMUSG00000022489	15	protein-coding	10	11	4	25	72	24	0.480723	151	304	304	0.322103	0.322103
404	ILMN_2672624	15166	Hcn2	hyperpolarization-activated, cyclic nucleotide-gated K+ 2	1	5.11404	610	HCN2	MGI:1298210|Ensembl:ENSMUSG00000020331|Vega:OTTMUSG00000027869	10	protein-coding	65	26	43	134	405	176	0.60664	398	126	126	0.320422	0.320422
405	ILMN_1251276	58188	Vstm2b	V-set and transmembrane domain containing 2B	4	3.94071	342865	VSTM2B	MGI:1914525|Ensembl:ENSMUSG00000039257	7	protein-coding	1	1	0	2	1	1	0.467456	125	543	543	0.319388	0.319388
406	ILMN_2644632	20910	Stxbp1	syntaxin binding protein 1	1	4.90394	6812	STXBP1	MGI:107363|Ensembl:ENSMUSG00000026797|Vega:OTTMUSG00000012527	2	protein-coding	54	48	52	154	344	166	0.581717	352	131	131	0.318529	0.318529
407	1441905_x_at	20646	Snrpn	small nuclear ribonucleoprotein N	2	4.59479	6638	SNRPN	MGI:98347|Ensembl:ENSMUSG00000000948	7	protein-coding	95	48	9	152	589	188	0.630598	438	121	121	0.3183	0.3183
408	ILMN_2491186	22771	Zic1	zinc finger protein of the cerebellum 1	3	4.29714	7545	ZIC1	MGI:106683|Ensembl:ENSMUSG00000032368|Vega:OTTMUSG00000020412	9	protein-coding	72	20	2	94	160	91	0.509737	209	180	180	0.315804	0.315804
409	1441706_at	114873	Dscaml1	Down syndrome cell adhesion molecule like 1	4	3.41773	57453	DSCAML1	MGI:2150309|Ensembl:ENSMUSG00000032087	9	protein-coding	3	4	0	7	8	5	0.469056	128	456	456	0.315237	0.315237
410	ILMN_1220482	107528	Magee1	melanoma antigen, family E, 1	4	3.9163	57692	MAGEE1	MGI:2148149|Ensembl:ENSMUSG00000031227|Vega:OTTMUSG00000018098	X	protein-coding	2	3	0	5	9	0	0.46456	121	582	581	0.314286	0.314286
411	ILMN_2677824	96935	Susd4	sushi domain containing 4	5	3.92257	55061	SUSD4	MGI:2138351|Ensembl:ENSMUSG00000038576|Vega:OTTMUSG00000027014	1	protein-coding	1	1	0	2	1	1	0.465305	122	543	543	0.313006	0.313006
412	ILMN_2992517	56526	Sept6	septin 6	2	4.06707	23157	SEPT6	MGI:1888939|Ensembl:ENSMUSG00000050379|Vega:OTTMUSG00000017110	X	protein-coding	12	18	1	31	148	33	0.482445	153	270	270	0.312809	0.312809
413	1442019_at	93896	Glp2r	glucagon-like peptide 2 receptor	3	3.67031	9340	GLP2R	MGI:2136733|Ensembl:ENSMUSG00000049928|Vega:OTTMUSG00000005929	11	protein-coding	13	14	11	38	425	84	0.503721	196	188	188	0.312419	0.312419
414	ILMN_2481026	100072	Camta1	calmodulin binding transcription activator 1	4	3.9702	23261	CAMTA1	MGI:2140230|Ensembl:ENSMUSG00000014592|Vega:OTTMUSG00000010309	4	protein-coding	2	13	0	15	23	13	0.470955	133	368	368	0.309669	0.309669
415	1452894_at	15572	Elavl4	ELAV (embryonic lethal, abnormal vision, Drosophila)-like 4 (Hu antigen D)	3	4.05771	1996	ELAVL4	MGI:107427|Ensembl:ENSMUSG00000028546|Vega:OTTMUSG00000008498	4	protein-coding	90	35	10	135	238	164	0.556888	306	133	133	0.308198	0.308198
416	1454855_at	50791	Magi2	membrane associated guanylate kinase, WW and PDZ domain containing 2	5	3.61997	9863	MAGI2	MGI:1354953|Ensembl:ENSMUSG00000040003|Vega:OTTMUSG00000025140	5	protein-coding	16	29	20	65	200	71	0.496812	180	201	201	0.307877	0.307877
417	ILMN_2644229	16508	Kcnd2	potassium voltage-gated channel, Shal-related family, member 2	1	5.69365	3751	KCND2	MGI:102663|Ensembl:ENSMUSG00000060882|Vega:OTTMUSG00000036888	6	protein-coding	57	41	70	168	439	226	0.675394	502	111	111	0.306417	0.306417
418	ILMN_1249463	328643	Vwa5b2	von Willebrand factor A domain containing 5B2	1	3.90775	90113	VWA5B2	MGI:2681859|Ensembl:ENSMUSG00000046613|Vega:OTTMUSG00000026177	16	protein-coding	0	1	0	1	0	0	0.463546	117	582	581	0.305483	0.305483
419	1437156_at	69352	Necab1	N-terminal EF-hand calcium binding protein 1	3	3.44785	64168	NECAB1	MGI:1916602|Ensembl:ENSMUSG00000040536|Vega:OTTMUSG00000004586	4	protein-coding	1	2	1	4	30	28	0.47319	142	289	289	0.303914	0.303914
420	ILMN_2672943	21367	Cntn2	contactin 2	0	4.52258	6900	CNTN2	MGI:104518|Ensembl:ENSMUSG00000053024	1	protein-coding	157	47	6	210	330	154	0.536479	275	137	137	0.30299	0.30299
421	1415885_at	12653	Chgb	chromogranin B	4	5.62814	1114	CHGB	MGI:88395|Ensembl:ENSMUSG00000027350|Vega:OTTMUSG00000015662	2	protein-coding	34	37	7	78	488	261	0.772417	603	105	105	0.302589	0.302589
422	1460419_a_at	18751	Prkcb	protein kinase C, beta	4	4.6351	5579	PRKCB	MGI:97596|Ensembl:ENSMUSG00000052889|Vega:OTTMUSG00000016521	7	protein-coding	135	290	106	531	1064	221	0.63613	445	112	112	0.300936	0.300936
423	ILMN_1234039	22348	Slc32a1	solute carrier family 32 (GABA vesicular transporter), member 1	1	7.32639	140679	SLC32A1	MGI:1194488|Ensembl:ENSMUSG00000037771|Vega:OTTMUSG00000015925	2	protein-coding	56	9	14	79	282	279	0.869073	639	102	102	0.297986	0.297986
424	1423561_at	54003	Nell2	NEL-like 2 (chicken)	3	3.59768	4753	NELL2	MGI:1858510|Ensembl:ENSMUSG00000022454	15	protein-coding	8	5	11	24	136	82	0.493753	176	192	192	0.297905	0.297905
425	ILMN_1247503	381418	Ctxn2	cortexin 2	1	3.88027	399697	CTXN2	MGI:2139444|Ensembl:ENSMUSG00000074872	2	protein-coding	0	0	0	0	1	0	0.460286	113	582	581	0.296588	0.296588
426	ILMN_2702887	64051	Sv2a	synaptic vesicle glycoprotein 2 a	1	6.7916	9900	SV2A	MGI:1927139|Ensembl:ENSMUSG00000038486|Vega:OTTMUSG00000021899	3	protein-coding	44	13	14	71	391	283	0.805635	620	101	101	0.29415	0.29415
427	ILMN_2760540	223726	Mpped1	metallophosphoesterase domain containing 1	2	3.89612	758	MPPED1	MGI:106316|Ensembl:ENSMUSG00000041708|Vega:OTTMUSG00000026120	15	protein-coding	1	2	0	3	3	3	0.462167	115	498	498	0.29368	0.29368
428	1434819_at	240119	St6gal2	beta galactoside alpha 2,6 sialyltransferase 2	3	3.38301	84620	ST6GAL2	MGI:2445190|Ensembl:ENSMUSG00000024172|Vega:OTTMUSG00000028471	17	protein-coding	2	4	1	7	24	10	0.464292	120	401	401	0.291664	0.291664
429	1434709_at	319504	Nrcam	neuron-glia-CAM-related cell adhesion molecule	4	4.65228	4897	NRCAM	MGI:104750|Ensembl:ENSMUSG00000020598	12	protein-coding	42	26	7	75	273	254	0.638488	451	107	107	0.291166	0.291166
430	ILMN_1254128	240121	Fsd1	fibronectin type 3 and SPRY domain-containing protein	1	3.89637	79187	FSD1	MGI:1934858|Ensembl:ENSMUSG00000011589	17	protein-coding	2	3	0	5	26	5	0.462197	116	456	456	0.291165	0.291165
431	1427017_at	212712	Satb2	special AT-rich sequence binding protein 2	4	3.45789	23314	SATB2	MGI:2679336|Ensembl:ENSMUSG00000038331|Vega:OTTMUSG00000023028	1	protein-coding	68	15	1	84	90	45	0.474568	145	239	239	0.289569	0.289569
432	ILMN_2610442	216881	Wscd1	WSC domain containing 1	2	3.8738	23302	WSCD1	MGI:2448493|Ensembl:ENSMUSG00000020811|Vega:OTTMUSG00000006094	11	protein-coding	2	0	0	2	0	0	0.45952	109	582	581	0.287599	0.287599
433	ILMN_1257625	19283	Ptprz1	protein tyrosine phosphatase, receptor type Z, polypeptide 1	0	4.87592	5803	PTPRZ1	MGI:97816|Ensembl:ENSMUSG00000068748	6	protein-coding	45	51	14	110	283	220	0.578393	347	114	114	0.287076	0.287076
434	1450070_s_at	18479	Pak1	p21 protein (Cdc42/Rac)-activated kinase 1	5	3.72056	5058	PAK1	MGI:1339975|Ensembl:ENSMUSG00000030774|Vega:OTTMUSG00000021135	7	protein-coding	87	264	56	407	756	134	0.510617	211	145	145	0.282377	0.282377
435	ILMN_2732634	29873	Cspg5	chondroitin sulfate proteoglycan 5	2	3.96605	10675	CSPG5	MGI:1352747|Ensembl:ENSMUSG00000032482	9	protein-coding	11	5	9	25	54	33	0.470462	130	270	270	0.279949	0.279949
436	1424306_at	83603	Elovl4	elongation of very long chain fatty acids (FEN1/Elo2, SUR4/Elo3, yeast)-like 4	4	3.36496	6785	ELOVL4	MGI:1933331|Ensembl:ENSMUSG00000032262	9	protein-coding	21	27	1	49	81	11	0.461814	114	388	388	0.278148	0.278148
437	1451674_at	57138	Slc12a5	solute carrier family 12, member 5	1	5.38016	57468	SLC12A5	MGI:1862037|Ensembl:ENSMUSG00000017740|Vega:OTTMUSG00000019699	2	protein-coding	53	22	52	127	330	308	0.738384	573	95	95	0.275922	0.275922
438	ILMN_1237378	20254	Scg2	secretogranin II	2	5.66959	7857	SCG2	MGI:103033|Ensembl:ENSMUSG00000050711	1	protein-coding	18	30	14	62	441	304	0.67254	496	96	96	0.271719	0.271719
439	1447669_s_at	14706	Gng4	guanine nucleotide binding protein (G protein), gamma 4	4	3.32563	2786	GNG4	MGI:102703|Ensembl:ENSMUSG00000021303|Vega:OTTMUSG00000029824	13	protein-coding	6	13	0	19	2	1	0.456416	103	543	543	0.271335	0.271335
440	1416711_at	21375	Tbr1	T-box brain gene 1	1	3.5773	10716	TBR1	MGI:107404|Ensembl:ENSMUSG00000035033|Vega:OTTMUSG00000013075	2	protein-coding	264	4	0	268	126	102	0.490956	171	162	162	0.270939	0.270939
441	1451595_a_at	16536	Kcnq2	potassium voltage-gated channel, subfamily Q, member 2	1	4.53634	3785	KCNQ2	MGI:1309503|Ensembl:ENSMUSG00000016346|Vega:OTTMUSG00000016558	2	protein-coding	23	80	22	125	340	295	0.622577	420	99	99	0.269763	0.269763
442	ILMN_2481279	269788	Lhfpl4	lipoma HMGIC fusion partner-like protein 4	1	3.84134	375323	LHFPL4	MGI:3057108|Ensembl:ENSMUSG00000042873|Vega:OTTMUSG00000034861	6	protein-coding	0	1	0	1	2	0	0.455668	101	582	581	0.269333	0.269333
443	1447992_s_at	18549	Pcsk2	proprotein convertase subtilisin/kexin type 2	1	5.46255	5126	PCSK2	MGI:97512|Ensembl:ENSMUSG00000027419|Vega:OTTMUSG00000003089	2	protein-coding	100	38	25	163	857	326	0.749691	578	91	91	0.266402	0.266402
444	ILMN_2596385	16494	Kcna6	potassium voltage-gated channel, shaker-related, subfamily, member 6	3	4.75049	3742	KCNA6	MGI:96663|Ensembl:ENSMUSG00000038077|Vega:OTTMUSG00000022444	6	protein-coding	11	5	7	23	539	257	0.563514	318	106	106	0.265886	0.265886
445	1448397_at	14623	Gjb6	gap junction protein, beta 6	2	4.31297	10804	GJB6	MGI:107588|Ensembl:ENSMUSG00000040055|Vega:OTTMUSG00000034673	14	protein-coding	55	112	8	175	907	284	0.59192	372	100	100	0.264739	0.264739
446	ILMN_2764651	17751	Mt3	metallothionein 3	1	5.94458	4504	MT3	MGI:97173|Ensembl:ENSMUSG00000031760	8	protein-coding	35	52	30	117	699	326	0.705159	534	91	91	0.263159	0.263159
447	1435424_x_at	72555	Shisa9	shisa homolog 9 (Xenopus laevis)	4	3.31931	729993	SHISA9	MGI:1919805|Ensembl:ENSMUSG00000022494	16	protein-coding	2	3	0	5	3	3	0.455549	100	498	498	0.26121	0.26121
448	ILMN_1251064	432450	Nkain2	Na+/K+ transporting ATPase interacting 2	1	3.83878	154215	NKAIN2	MGI:1923447|Ensembl:ENSMUSG00000069671	10	protein-coding	3	4	0	7	10	2	0.455365	99	520	520	0.260659	0.260659
449	1437927_at	23859	Dlg2	discs, large homolog 2 (Drosophila)	4	3.52419	1740	DLG2	MGI:1344351|Ensembl:ENSMUSG00000052572|Vega:OTTMUSG00000016974	7	protein-coding	25	47	12	84	109	100	0.483667	156	165	165	0.260367	0.260367
450	1433945_at	70638	Fam189a1	family with sequence similarity 189, member A1	3	3.31061	23359	FAM189A1	MGI:1917888|Ensembl:ENSMUSG00000030518|Vega:OTTMUSG00000031035	7	protein-coding	0	1	0	1	0	0	0.454355	97	582	581	0.260054	0.260054
451	1435933_at	110876	Scn2a1	sodium channel, voltage-gated, type II, alpha 1	0	6.33313	6326	SCN2A	MGI:98248|Ensembl:ENSMUSG00000075318|Vega:OTTMUSG00000012963	2	protein-coding	31	58	26	115	469	375	0.869171	640	87	87	0.260003	0.260003
452	1423173_at	17957	Napb	N-ethylmaleimide sensitive fusion protein attachment protein beta	1	5.01129	63908	NAPB	MGI:104562|Ensembl:ENSMUSG00000027438|Vega:OTTMUSG00000015716	2	protein-coding	9	4	1	14	599	334	0.687759	515	90	90	0.25921	0.25921
453	ILMN_3160970	574402	Gpr17	G protein-coupled receptor 17	0	3.91098	2840	GPR17	MGI:3584514|Ensembl:ENSMUSG00000052229|Vega:OTTMUSG00000023990	18	protein-coding	6	9	4	19	45	35	0.46393	118	262	262	0.259149	0.259149
454	1419063_at	22239	Ugt8a	UDP galactosyltransferase 8A	4	3.68136	7368	UGT8	MGI:109522|Ensembl:ENSMUSG00000032854	3	protein-coding	48	11	5	64	472	167	0.505238	197	130	130	0.257611	0.257611
455	1435832_at	192198	Lrrc4	leucine rich repeat containing 4	4	3.33907	64101	LRRC4	MGI:2182081|Ensembl:ENSMUSG00000049939|Vega:OTTMUSG00000023270	6	protein-coding	8	13	1	22	23	15	0.458261	105	350	350	0.255071	0.255071
456	ILMN_2500540	108030	Lin7a	lin-7 homolog A (C. elegans)	3	3.98243	8825	LIN7A	MGI:2135609|Ensembl:ENSMUSG00000019906	10	protein-coding	14	18	9	41	358	88	0.472405	136	184	184	0.252217	0.252217
457	1452142_at	232333	Slc6a1	solute carrier family 6 (neurotransmitter transporter, GABA), member 1	1	5.50525	6529	SLC6A1	MGI:95627|Ensembl:ENSMUSG00000030310	6	protein-coding	52	41	33	126	480	399	0.755551	586	84	84	0.249247	0.249247
458	1436142_at	238276	Akap5	A kinase (PRKA) anchor protein 5	1	3.78044	9495	AKAP5	MGI:2685104|Ensembl:ENSMUSG00000021057|Vega:OTTMUSG00000016317	12	protein-coding	27	45	41	113	777	242	0.518835	235	110	110	0.248647	0.248647
459	ILMN_3074952	54161	Copg	coatomer protein complex, subunit gamma	2	3.80018	22820	COPG	MGI:1858696|Ensembl:ENSMUSG00000030058|Vega:OTTMUSG00000022960	6	protein-coding	4	20	2	26	17	1	0.450786	93	543	543	0.248494	0.248494
460	1441983_at	16522	Kcnj6	potassium inwardly-rectifying channel, subfamily J, member 6	2	3.76122	3763	KCNJ6	MGI:104781|Ensembl:ENSMUSG00000043301	16	protein-coding	257	40	17	314	290	221	0.516197	225	112	112	0.247772	0.247772
461	1440759_at	16490	Kcna2	potassium voltage-gated channel, shaker-related subfamily, member 2	3	3.86874	3737	KCNA2	MGI:96659|Ensembl:ENSMUSG00000040724	3	protein-coding	35	50	31	116	996	278	0.530953	261	103	103	0.246082	0.246082
462	ILMN_2521965	22784	Slc30a3	solute carrier family 30 (zinc transporter), member 3	5	3.99287	7781	SLC30A3	MGI:1345280|Ensembl:ENSMUSG00000029151|Vega:OTTMUSG00000015164	5	protein-coding	44	8	7	59	121	105	0.473643	144	159	159	0.245067	0.245067
463	ILMN_2729364	237213	Glra2	glycine receptor, alpha 2 subunit	1	3.83747	2742	GLRA2	MGI:95748|Ensembl:ENSMUSG00000018589|Vega:OTTMUSG00000019555	X	protein-coding	20	9	6	35	23	13	0.45521	98	368	368	0.243865	0.243865
464	1443119_at	108073	Grm7	glutamate receptor, metabotropic 7	2	4.00298	2917	GRM7	MGI:1351344|Ensembl:ENSMUSG00000056755|Vega:OTTMUSG00000037574	6	protein-coding	29	34	31	94	317	301	0.549377	292	97	97	0.243537	0.243537
465	1419200_at	57780	Fxyd7	FXYD domain-containing ion transport regulator 7	4	3.29241	53822	FXYD7	MGI:1889006|Ensembl:ENSMUSG00000036578	7	protein-coding	7	4	2	13	13	9	0.451856	95	409	409	0.242362	0.242362
466	ILMN_2599233	20284	Scrg1	scrapie responsive gene 1	2	3.80371	11341	SCRG1	MGI:1328308|Ensembl:ENSMUSG00000031610	8	protein-coding	6	4	3	13	11	9	0.451205	94	409	409	0.240246	0.240246
467	1429651_at	74189	Phactr3	phosphatase and actin regulator 3	5	3.27827	116154	PHACTR3	MGI:1921439|Ensembl:ENSMUSG00000027525|Vega:OTTMUSG00000016326	2	protein-coding	4	8	3	15	8	4	0.449916	91	477	477	0.239524	0.239524
468	1418500_at	54561	Nap1l3	nucleosome assembly protein 1-like 3	5	3.26765	4675	NAP1L3	MGI:1859565|Ensembl:ENSMUSG00000055733|Vega:OTTMUSG00000018572	X	protein-coding	2	2	1	5	14	3	0.448459	90	498	498	0.238727	0.238727
469	1456487_at	432530	Adcy1	adenylate cyclase 1	1	5.49371	107	ADCY1	MGI:99677|Ensembl:ENSMUSG00000020431|Vega:OTTMUSG00000005134	11	protein-coding	65	26	9	100	1415	423	0.753968	583	79	79	0.236193	0.236193
470	ILMN_2704110	14788	Gpr162	G protein-coupled receptor 162	3	3.77875	27239	GPR162	MGI:1315214|Ensembl:ENSMUSG00000038390	6	protein-coding	2	3	0	5	3	2	0.448244	88	520	520	0.235507	0.235507
471	1455785_at	16485	Kcna1	potassium voltage-gated channel, shaker-related subfamily, member 1	1	5.05698	3736	KCNA1	MGI:96654|Ensembl:ENSMUSG00000047976	6	protein-coding	91	50	34	175	772	419	0.69403	521	80	80	0.235068	0.235068
472	ILMN_1244675	12933	Crmp1	collapsin response mediator protein 1	1	4.10203	1400	CRMP1	MGI:107793|Ensembl:ENSMUSG00000029121	5	protein-coding	34	22	3	59	387	170	0.486593	162	128	128	0.234049	0.234049
473	1434728_at	53623	Gria3	glutamate receptor, ionotropic, AMPA3 (alpha 3)	1	4.7253	2892	GRIA3	MGI:95810|Ensembl:ENSMUSG00000001986|Vega:OTTMUSG00000017323	X	protein-coding	63	47	39	149	456	412	0.64851	466	81	81	0.233494	0.233494
474	1455021_at	54393	Gabbr1	gamma-aminobutyric acid (GABA) B receptor, 1	4	3.60442	2550	GABBR1	MGI:1860139|Ensembl:ENSMUSG00000024462|Vega:OTTMUSG00000037319	17	protein-coding	78	80	94	252	322	199	0.494678	178	118	118	0.233378	0.233378
475	ILMN_2856798	51799	Rundc3a	RUN domain containing 3A	3	3.79893	10900	RUNDC3A	MGI:1858752|Ensembl:ENSMUSG00000006575|Vega:OTTMUSG00000002785	11	protein-coding	2	1	1	4	26	16	0.450638	92	346	346	0.229002	0.229002
476	1429021_at	13838	Epha4	Eph receptor A4	4	4.03352	2043	EPHA4	MGI:98277|Ensembl:ENSMUSG00000026235	1	protein-coding	232	46	21	299	1032	373	0.553569	302	88	88	0.228538	0.228538
477	ILMN_1229427	72930	Ppp2r2b	protein phosphatase 2 (formerly 2A), regulatory subunit B (PR 52), beta isoform	3	3.87721	5521	PPP2R2B	MGI:1920180|Ensembl:ENSMUSG00000024500|Vega:OTTMUSG00000028098	18	protein-coding	3	63	12	78	86	72	0.459924	111	199	199	0.228143	0.228143
478	1436998_at	237761	Ankrd43	sosondowah ankyrin repeat domain family member A	5	3.23767	134548	SOWAHA	MGI:2687280|Ensembl:ENSMUSG00000044352|Vega:OTTMUSG00000005638	11	protein-coding	1	1	0	2	1	1	0.444345	84	543	543	0.227372	0.227372
479	1455925_at	77630	Prdm8	PR domain containing 8	3	3.2568	56978	PRDM8	MGI:1924880|Ensembl:ENSMUSG00000035456	5	protein-coding	6	4	0	10	6	5	0.44697	86	456	456	0.226741	0.226741
480	ILMN_2993652	13004	Ncan	neurocan	0	4.11924	1463	NCAN	MGI:104694|Ensembl:ENSMUSG00000002341|Vega:OTTMUSG00000022194	8	protein-coding	29	18	16	63	220	191	0.488634	164	119	119	0.226253	0.226253
481	ILMN_2645263	80883	Ntng1	netrin G1	3	3.91262	22854	NTNG1	MGI:1934028|Ensembl:ENSMUSG00000059857	3	protein-coding	11	16	0	27	103	97	0.464125	119	170	170	0.225443	0.225443
482	ILMN_1224963	20979	Syt1	synaptotagmin I	1	7.16649	6857	SYT1	MGI:99667|Ensembl:ENSMUSG00000035864|Vega:OTTMUSG00000016266	10	protein-coding	98	55	87	240	904	451	0.850106	632	74	74	0.22527	0.22527
483	1453273_at	67498	Kcnv1	potassium channel, subfamily V, member 1	0	3.25134	27012	KCNV1	MGI:1914748|Ensembl:ENSMUSG00000022342	15	protein-coding	0	5	1	6	8	5	0.44622	85	456	456	0.224482	0.224482
484	1416211_a_at	19242	Ptn	pleiotrophin	4	4.00371	5764	PTN	MGI:97804|Ensembl:ENSMUSG00000029838	6	protein-coding	79	84	23	186	801	377	0.549477	293	86	86	0.222945	0.222945
485	1423231_at	64011	Nrgn	neurogranin	0	5.08172	4900	NRGN	MGI:1927184|Ensembl:ENSMUSG00000053310	9	protein-coding	34	24	15	73	747	444	0.697426	525	75	75	0.222646	0.222646
486	ILMN_1253269	240843	Fam5b	family with sequence similarity 5, member B	1	3.73985	57795	FAM5B	MGI:2443333|Ensembl:ENSMUSG00000004031	1	protein-coding	0	0	1	1	3	2	0.443629	82	520	520	0.221436	0.221436
487	ILMN_2514202	59033	Slc4a8	solute carrier family 4 (anion exchanger), member 8	2	3.77928	9498	SLC4A8	MGI:1928745|Ensembl:ENSMUSG00000023032|Vega:OTTMUSG00000035009	15	protein-coding	6	8	3	17	53	23	0.448307	89	310	310	0.21819	0.21819
488	1450123_at	20191	Ryr2	ryanodine receptor 2, cardiac	3	3.87018	6262	RYR2	MGI:99685|Ensembl:ENSMUSG00000021313	13	protein-coding	129	116	65	310	1740	390	0.531151	262	85	85	0.214768	0.214768
489	ILMN_2611295	66959	Dusp26	dual specificity phosphatase 26 (putative)	5	4.36048	78986	DUSP26	MGI:1914209|Ensembl:ENSMUSG00000039661|Vega:OTTMUSG00000027144	8	protein-coding	3	7	0	10	371	361	0.51725	231	89	89	0.214187	0.214187
490	1435404_at	214240	Disp2	dispatched homolog 2 (Drosophila)	5	3.22306	85455	DISP2	MGI:2388733|Ensembl:ENSMUSG00000040035|Vega:OTTMUSG00000015642	2	protein-coding	2	3	0	5	2	1	0.44234	78	543	543	0.212981	0.212981
491	1428852_at	208869	Dock3	dedicator of cyto-kinesis 3	5	3.34781	1795	DOCK3	MGI:2429763|Ensembl:ENSMUSG00000039716|Vega:OTTMUSG00000036142	9	protein-coding	10	13	5	28	219	97	0.45946	108	170	170	0.212159	0.212159
492	ILMN_2417413	67144	Lrrc40	leucine rich repeat containing 40	2	3.7254	55631	LRRC40	MGI:1914394|Ensembl:ENSMUSG00000063052|Vega:OTTMUSG00000031933	3	protein-coding	0	0	0	0	0	0	0.441915	77	582	581	0.212121	0.212121
493	1450193_at	15165	Hcn1	hyperpolarization-activated, cyclic nucleotide-gated K+ 1	2	3.45953	348980	HCN1	MGI:1096392|Ensembl:ENSMUSG00000021730|Vega:OTTMUSG00000035649	13	protein-coding	82	23	43	148	308	218	0.474793	147	115	115	0.211257	0.211257
494	1450121_at	20265	Scn1a	sodium channel, voltage-gated, type I, alpha	1	4.91508	6323	SCN1A	MGI:98246|Ensembl:ENSMUSG00000064329|Vega:OTTMUSG00000013102	2	protein-coding	33	180	20	233	638	473	0.674556	500	71	71	0.210946	0.210946
495	ILMN_3101483	66673	Sorcs3	sortilin-related VPS10 domain containing receptor 3	1	3.73249	22986	SORCS3	MGI:1913923|Ensembl:ENSMUSG00000063434	19	protein-coding	1	2	0	3	12	10	0.442756	80	401	401	0.209175	0.209175
496	1437160_at	192167	Nlgn1	neuroligin 1	2	3.35045	22871	NLGN1	MGI:2179435|Ensembl:ENSMUSG00000063887	3	protein-coding	34	15	35	84	177	109	0.459822	110	158	158	0.208829	0.208829
497	ILMN_2991912	19339	Rab3a	RAB3A, member RAS oncogene family	5	4.23083	5864	RAB3A	MGI:97843|Ensembl:ENSMUSG00000031840|Vega:OTTMUSG00000016949	8	protein-coding	76	48	34	158	536	318	0.501871	191	93	93	0.207357	0.207357
498	ILMN_2736314	320158	Zmat4	zinc finger, matrin type 4	3	3.72204	79698	ZMAT4	MGI:2443497|Ensembl:ENSMUSG00000037492|Vega:OTTMUSG00000030997	8	protein-coding	0	2	0	2	2	0	0.441517	75	582	581	0.207182	0.207182
499	ILMN_2643241	11419	Accn2	amiloride-sensitive cation channel 2, neuronal	1	4.38566	41	ACCN2	MGI:1194915|Ensembl:ENSMUSG00000023017	15	protein-coding	60	46	45	151	525	408	0.520237	241	82	82	0.204534	0.204534
500	ILMN_2922321	140919	Slc17a6	solute carrier family 17 (sodium-dependent inorganic phosphate cotransporter), member 6	1	5.90348	57084	SLC17A6	MGI:2156052|Ensembl:ENSMUSG00000030500	7	protein-coding	117	12	54	183	494	488	0.700284	528	67	67	0.202004	0.202004
501	ILMN_2836312	319655	Podxl2	podocalyxin-like 2	5	3.71305	50512	PODXL2	MGI:2442488|Ensembl:ENSMUSG00000033152|Vega:OTTMUSG00000024320	6	protein-coding	2	7	0	9	14	3	0.44045	74	498	498	0.201269	0.201269
502	ILMN_1229019	230903	Fbxo44	F-box protein 44	4	3.71299	93611	FBXO44	MGI:1354744|Ensembl:ENSMUSG00000029001|Vega:OTTMUSG00000010932	4	protein-coding	1	9	0	10	5	1	0.440443	73	543	543	0.200795	0.200795
503	1422520_at	18040	Nefm	neurofilament, medium polypeptide	2	5.56397	4741	NEFM	MGI:97314|Ensembl:ENSMUSG00000022054|Vega:OTTMUSG00000016378	14	protein-coding	572	30	10	612	537	524	0.76361	595	65	65	0.199417	0.199417
504	ILMN_1250286	17918	Myo5a	myosin VA	1	4.03477	4644	MYO5A	MGI:105976|Ensembl:ENSMUSG00000034593|Vega:OTTMUSG00000016492	9	protein-coding	196	54	23	273	1325	300	0.478614	149	98	98	0.194472	0.194472
505	ILMN_2672903	270190	Ephb1	Eph receptor B1	3	3.93013	2047	EPHB1	MGI:1096337|Ensembl:ENSMUSG00000032537|Vega:OTTMUSG00000021086	9	protein-coding	86	42	22	150	388	202	0.466201	123	116	116	0.194457	0.194457
506	1439843_at	12326	Camk4	calcium/calmodulin-dependent protein kinase IV	2	4.21937	814	CAMK4	MGI:88258|Ensembl:ENSMUSG00000038128	18	protein-coding	71	52	42	165	922	486	0.579074	348	69	69	0.194454	0.194454
507	1418937_at	13371	Dio2	deiodinase, iodothyronine, type II	5	3.32993	1734	DIO2	MGI:1338833|Ensembl:ENSMUSG00000007682	12	protein-coding	40	81	28	149	309	145	0.457006	104	140	140	0.192486	0.192486
508	1423860_at	19215	Ptgds	prostaglandin D2 synthase (brain)	3	5.84082	5730	PTGDS	MGI:99261|Ensembl:ENSMUSG00000015090|Vega:OTTMUSG00000012118	2	protein-coding	95	79	32	206	2213	585	0.801606	617	62	62	0.191886	0.191886
509	1435307_at	218440	Ankrd34b	ankyrin repeat domain 34B	4	3.1906	340120	ANKRD34B	MGI:2443245|Ensembl:ENSMUSG00000045034|Vega:OTTMUSG00000036592	13	protein-coding	2	1	0	3	5	2	0.437885	69	520	520	0.190058	0.190058
510	ILMN_1233146	19417	Rasgrf1	RAS protein-specific guanine nucleotide-releasing factor 1	1	7.49421	5923	RASGRF1	MGI:99694|Ensembl:ENSMUSG00000032356	9	protein-coding	70	35	0	105	2914	596	0.888981	643	61	61	0.189863	0.189863
511	1435578_s_at	13131	Dab1	disabled homolog 1 (Drosophila)	4	3.40275	1600	DAB1	MGI:108554|Ensembl:ENSMUSG00000028519|Vega:OTTMUSG00000008111	4	protein-coding	172	45	15	232	279	248	0.467	124	108	108	0.188439	0.188439
512	ILMN_2737867	17755	Mtap1b	microtubule-associated protein 1B	5	4.29946	4131	MAP1B	MGI:1306778|Ensembl:ENSMUSG00000052727	13	protein-coding	68	45	52	165	636	435	0.510012	210	77	77	0.188042	0.188042
513	1436387_at	26556	Homer1	homer homolog 1 (Drosophila)	3	4.15504	9456	HOMER1	MGI:1347345|Ensembl:ENSMUSG00000007617|Vega:OTTMUSG00000016339	13	protein-coding	50	32	0	82	736	493	0.570247	332	66	66	0.185911	0.185911
514	1439607_at	241919	Slc7a14	solute carrier family 7 (cationic amino acid transporter, y+ system), member 14	4	3.18306	57709	SLC7A14	MGI:3040688|Ensembl:ENSMUSG00000069072|Vega:OTTMUSG00000022774	3	protein-coding	0	1	0	1	4	2	0.43685	67	520	520	0.185119	0.185119
515	ILMN_3076948	12937	Pcdha6	protocadherin alpha 6	3	3.72463	56142	PCDHA6	MGI:1298367	18	protein-coding	8	2	2	12	65	39	0.441824	76	256	256	0.185031	0.185031
516	1450779_at	12140	Fabp7	fatty acid binding protein 7, brain	5	3.34384	2173	FABP7	MGI:101916|Ensembl:ENSMUSG00000019874|Vega:OTTMUSG00000035387	10	protein-coding	157	39	3	199	212	185	0.458916	106	123	123	0.184396	0.184396
517	1430136_at	108069	Grm3	glutamate receptor, metabotropic 3	1	4.95776	2913	GRM3	MGI:1351340|Ensembl:ENSMUSG00000003974	5	protein-coding	31	53	38	122	664	629	0.680413	509	60	60	0.182509	0.182509
518	ILMN_2599008	67703	Kirrel3	kin of IRRE like 3 (Drosophila)	2	3.72986	84623	KIRREL3	MGI:1914953|Ensembl:ENSMUSG00000032036|Vega:OTTMUSG00000016800	9	protein-coding	10	5	0	15	116	68	0.442445	79	207	207	0.181456	0.181456
519	ILMN_2505510	52897	Rbfox3	RNA binding protein, fox-1 homolog (C. elegans) 3	1	6.20818	146713	RBFOX3	MGI:106368|Ensembl:ENSMUSG00000025576|Vega:OTTMUSG00000003975	11	protein-coding	362	2	2	366	673	669	0.736429	571	58	58	0.17931	0.17931
520	ILMN_2698911	67937	Tmem59l	transmembrane protein 59-like	3	3.67028	25789	TMEM59L	MGI:1915187|Ensembl:ENSMUSG00000035964	8	protein-coding	0	1	0	1	4	1	0.435377	64	543	543	0.178402	0.178402
521	1435197_at	18993	Pou3f3	POU domain, class 3, transcription factor 3	4	3.19626	5455	POU3F3	MGI:102564|Ensembl:ENSMUSG00000045515|Vega:OTTMUSG00000022569	1	protein-coding	63	6	7	76	65	31	0.438661	71	278	278	0.178082	0.178082
522	1460608_at	12287	Cacna1b	calcium channel, voltage-dependent, N type, alpha 1B subunit	3	3.72736	774	CACNA1B	MGI:88296|Ensembl:ENSMUSG00000004113|Vega:OTTMUSG00000012011	2	protein-coding	57	34	45	136	1210	482	0.51155	214	70	70	0.17648	0.17648
523	1435392_at	244484	Wdr17	WD repeat domain 17	3	3.17136	116966	WDR17	MGI:1924662|Ensembl:ENSMUSG00000039375|Vega:OTTMUSG00000026034	8	protein-coding	1	3	0	4	2	1	0.435244	63	543	543	0.175877	0.175877
524	ILMN_2717814	16502	Kcnc1	potassium voltage gated channel, Shaw-related subfamily, member 1	4	4.12177	3746	KCNC1	MGI:96667|Ensembl:ENSMUSG00000058975|Vega:OTTMUSG00000034762	7	protein-coding	49	12	18	79	777	432	0.488934	165	78	78	0.175715	0.175715
525	1440891_at	14802	Gria4	glutamate receptor, ionotropic, AMPA4 (alpha 4)	3	3.65779	2893	GRIA4	MGI:95811|Ensembl:ENSMUSG00000025892	9	protein-coding	43	37	27	107	503	463	0.502003	193	72	72	0.174945	0.174945
526	ILMN_1224996	20370	Sez6	seizure related gene 6	1	3.67843	124925	SEZ6	MGI:104745|Ensembl:ENSMUSG00000000632|Vega:OTTMUSG00000000068	11	protein-coding	12	3	3	18	13	12	0.436344	65	378	378	0.173586	0.173586
527	1445679_at	320707	Atp2b3	ATPase, Ca++ transporting, plasma membrane 3	4	3.22689	492	ATP2B3	MGI:1347353|Ensembl:ENSMUSG00000031376|Vega:OTTMUSG00000017670	X	protein-coding	6	14	13	33	306	100	0.442865	81	165	165	0.173407	0.173407
528	1421017_at	18183	Nrg3	neuregulin 3	3	3.18223	10718	NRG3	MGI:1097165|Ensembl:ENSMUSG00000041014|Vega:OTTMUSG00000037129	14	protein-coding	12	17	1	30	47	19	0.436736	66	330	330	0.172504	0.172504
529	ILMN_2988743	14617	Gjd2	gap junction protein, delta 2	2	3.84135	57369	GJD2	MGI:1334209|Ensembl:ENSMUSG00000068615|Vega:OTTMUSG00000015176	2	protein-coding	106	17	24	147	320	247	0.45567	102	109	109	0.171042	0.171042
530	1452380_at	13841	Epha7	Eph receptor A7	2	3.19581	2045	EPHA7	MGI:95276|Ensembl:ENSMUSG00000028289|Vega:OTTMUSG00000004869	4	protein-coding	67	31	8	106	102	54	0.438599	70	225	225	0.168724	0.168724
531	1433906_at	74438	Clvs1	clavesin 1	5	3.1633	157807	CLVS1	MGI:1921688|Ensembl:ENSMUSG00000041216|Vega:OTTMUSG00000004383	4	protein-coding	1	4	1	6	4	3	0.434137	60	498	498	0.166898	0.166898
532	ILMN_2448213	20541	Slc8a1	solute carrier family 8 (sodium/calcium exchanger), member 1	4	4.33016	6546	SLC8A1	MGI:107956|Ensembl:ENSMUSG00000054640	17	protein-coding	88	57	102	247	1916	546	0.513654	217	64	64	0.165715	0.165715
533	ILMN_2460754	14417	Gad2	glutamic acid decarboxylase 2	1	6.33107	2572	GAD2	MGI:95634|Ensembl:ENSMUSG00000026787|Vega:OTTMUSG00000011505	2	protein-coding	143	78	32	253	1627	766	0.751007	580	53	53	0.165546	0.165546
534	ILMN_2553162	243499	Lrrtm4	leucine rich repeat transmembrane neuronal 4	1	3.65946	80059	LRRTM4	MGI:2389180|Ensembl:ENSMUSG00000052581|Vega:OTTMUSG00000034091	6	protein-coding	4	1	1	6	2	2	0.434094	59	520	520	0.165053	0.165053
535	ILMN_2966602	353326	Rtl1	retrotransposon-like 1	2	3.7067	388015	RTL1	MGI:2656842	12	protein-coding	18	6	0	24	253	87	0.439698	72	187	187	0.165005	0.165005
536	1454672_at	18039	Nefl	neurofilament, light polypeptide	2	6.06987	4747	NEFL	MGI:97313|Ensembl:ENSMUSG00000022055|Vega:OTTMUSG00000016377	14	protein-coding	196	79	22	297	806	774	0.833041	628	52	52	0.163847	0.163847
537	ILMN_2691478	12426	Cckbr	cholecystokinin B receptor	1	4.30977	887	CCKBR	MGI:99479|Ensembl:ENSMUSG00000030898	7	protein-coding	67	85	37	189	1346	560	0.511235	212	63	63	0.162819	0.162819
538	1415978_at	22152	Tubb3	tubulin, beta 3 class III	5	3.42939	10381	TUBB3	MGI:107813|Ensembl:ENSMUSG00000062380|Vega:OTTMUSG00000027611	8	protein-coding	829	74	7	910	590	437	0.470657	132	76	76	0.159218	0.159218
539	1416561_at	14415	Gad1	glutamic acid decarboxylase 1	1	6.33184	2571	GAD1	MGI:95632|Ensembl:ENSMUSG00000070880|Vega:OTTMUSG00000033269	2	protein-coding	345	76	47	468	1035	904	0.868994	638	50	50	0.158262	0.158262
540	ILMN_2755026	14406	Gabrg2	gamma-aminobutyric acid (GABA) A receptor, subunit gamma 2	1	4.8119	2566	GABRG2	MGI:95623|Ensembl:ENSMUSG00000020436|Vega:OTTMUSG00000006345	11	protein-coding	82	87	38	207	1975	762	0.570799	337	54	54	0.157666	0.157666
541	ILMN_1235133	20964	Syn1	synapsin I	1	6.794	6853	SYN1	MGI:98460|Ensembl:ENSMUSG00000037217|Vega:OTTMUSG00000017181	X	protein-coding	120	37	40	197	984	936	0.80592	621	49	49	0.155012	0.155012
542	1435790_at	244723	Olfm2	olfactomedin 2	5	3.13426	93145	OLFM2	MGI:3045350|Ensembl:ENSMUSG00000032172	9	protein-coding	2	4	1	7	9	3	0.430152	55	498	498	0.154242	0.154242
543	1450712_at	16524	Kcnj9	potassium inwardly-rectifying channel, subfamily J, member 9	2	3.16797	3765	KCNJ9	MGI:108007|Ensembl:ENSMUSG00000038026	1	protein-coding	33	16	6	55	61	53	0.434778	62	230	230	0.153919	0.153919
544	ILMN_1213289	207182	Ggt7	gamma-glutamyltransferase 7	3	3.62295	2686	GGT7	MGI:1913385|Ensembl:ENSMUSG00000027603|Vega:OTTMUSG00000016060	2	protein-coding	1	5	1	7	6	2	0.429763	54	520	520	0.152255	0.152255
545	1423537_at	14432	Gap43	growth associated protein 43	2	4.97361	2596	GAP43	MGI:95639|Ensembl:ENSMUSG00000047261|Vega:OTTMUSG00000016275	16	protein-coding	216	39	75	330	1078	981	0.682588	511	48	48	0.149541	0.149541
546	1438194_at	20511	Slc1a2	solute carrier family 1 (glial high affinity glutamate transporter), member 2	0	6.86157	6506	SLC1A2	MGI:101931|Ensembl:ENSMUSG00000005089|Vega:OTTMUSG00000014848	2	protein-coding	81	82	100	263	1076	1010	0.941695	646	46	46	0.14668	0.14668
547	ILMN_2764112	72832	Crtac1	cartilage acidic protein 1	4	3.59843	55118	CRTAC1	MGI:1920082|Ensembl:ENSMUSG00000042401	19	protein-coding	3	12	0	15	15	5	0.426854	52	456	456	0.145403	0.145403
548	ILMN_1237021	17136	Mag	myelin-associated glycoprotein	1	6.1187	4099	MAG	MGI:96912|Ensembl:ENSMUSG00000036634	7	protein-coding	134	39	16	189	1099	1098	0.725815	558	44	44	0.139202	0.139202
549	1435807_at	12540	Cdc42	cell division cycle 42 homolog (S. cerevisiae)	5	3.55447	64465	Cdc42	MGI:106211|Ensembl:ENSMUSG00000006699|Vega:OTTMUSG00000009829	4	protein-coding	227	56	56	339	3166	748	0.487823	163	55	55	0.137502	0.137502
550	1419517_at	72978	Cnih3	cornichon homolog 3 (Drosophila)	5	3.08213	149111	CNIH3	MGI:1920228|Ensembl:ENSMUSG00000026514|Vega:OTTMUSG00000034937	1	protein-coding	0	0	1	1	3	3	0.422998	48	498	498	0.13617	0.13617
551	ILMN_1216639	18481	Pak3	p21 protein (Cdc42/Rac)-activated kinase 3	5	3.63789	5063	PAK3	MGI:1339656|Ensembl:ENSMUSG00000031284|Vega:OTTMUSG00000018957	X	protein-coding	33	39	11	83	707	102	0.431535	57	162	162	0.133579	0.133579
552	ILMN_1225587	192663	Abcg4	ATP-binding cassette, sub-family G (WHITE), member 4	5	3.57292	64137	ABCG4	MGI:1890594|Ensembl:ENSMUSG00000032131|Vega:OTTMUSG00000029282	9	protein-coding	11	12	0	23	53	20	0.423829	49	324	324	0.132995	0.132995
553	ILMN_2847248	218544	Sgtb	small glutamine-rich tetratricopeptide repeat (TPR)-containing, beta	4	3.56161	54557	SGTB	MGI:2444615|Ensembl:ENSMUSG00000042743|Vega:OTTMUSG00000035056	13	protein-coding	1	1	1	3	5	0	0.422486	46	582	581	0.132374	0.132374
554	1416828_at	20614	Snap25	synaptosomal-associated protein 25	2	7.2864	6616	SNAP25	MGI:98331|Ensembl:ENSMUSG00000027273|Vega:OTTMUSG00000015556	2	protein-coding	141	130	105	376	1314	1128	1	649	41	41	0.131833	0.131833
555	1436127_at	12919	Crhbp	corticotropin releasing hormone binding protein	2	3.15162	1393	CRHBP	MGI:88497|Ensembl:ENSMUSG00000021680	13	protein-coding	15	32	17	64	205	142	0.432535	58	143	143	0.131125	0.131125
556	1438780_at	56216	Stx1b	syntaxin 1B	5	3.12167	112755	STX1B	MGI:1930705|Ensembl:ENSMUSG00000030806|Vega:OTTMUSG00000031121	7	protein-coding	18	7	17	42	670	82	0.428425	53	192	192	0.130964	0.130964
557	1423135_at	21838	Thy1	thymus cell antigen 1, theta	4	3.75268	7070	THY1	MGI:98747|Ensembl:ENSMUSG00000032011|Vega:OTTMUSG00000016734	9	protein-coding	165	57	40	262	6166	984	0.515026	223	47	47	0.130958	0.130958
558	ILMN_2476948	14402	Gabrb3	gamma-aminobutyric acid (GABA) A receptor, subunit beta 3	2	6.37195	2562	GABRB3	MGI:95621|Ensembl:ENSMUSG00000033676|Vega:OTTMUSG00000031173	7	protein-coding	78	70	22	170	5681	1226	0.755855	587	40	40	0.127954	0.127954
559	ILMN_1237729	380684	Nefh	neurofilament, heavy polypeptide	2	3.98635	4744	NEFH	MGI:97309|Ensembl:ENSMUSG00000020396|Vega:OTTMUSG00000005075	11	protein-coding	212	34	18	264	944	867	0.47287	139	51	51	0.124524	0.124524
560	1457979_at	244310	Dlgap2	discs, large (Drosophila) homolog-associated protein 2	0	4.59665	9228	DLGAP2	MGI:2443181|Ensembl:ENSMUSG00000047495|Vega:OTTMUSG00000034008	8	protein-coding	2	18	36	56	1398	1232	0.630854	439	39	39	0.122131	0.122131
561	ILMN_2739111	320208	Tmem91	transmembrane protein 91	3	3.52568	641649	TMEM91	MGI:2443589|Ensembl:ENSMUSG00000061702|Vega:OTTMUSG00000023706	7	protein-coding	0	0	0	0	0	0	0.418224	42	582	581	0.121563	0.121563
562	ILMN_2432568	14804	Grid2	glutamate receptor, ionotropic, delta 2	2	3.68719	2895	GRID2	MGI:95813|Ensembl:ENSMUSG00000071424|Vega:OTTMUSG00000034292	6	protein-coding	219	15	9	243	427	404	0.437383	68	83	83	0.120889	0.120889
563	ILMN_2760629	18195	Nsf	N-ethylmaleimide sensitive fusion protein	2	3.81261	4905	NSF	MGI:104560|Ensembl:ENSMUSG00000034187|Vega:OTTMUSG00000003022	11	protein-coding	27	53	23	103	1660	640	0.45226	96	59	59	0.120425	0.120425
564	ILMN_2433635	13839	Epha5	Eph receptor A5	4	3.56242	2044	EPHA5	MGI:99654|Ensembl:ENSMUSG00000029245|Vega:OTTMUSG00000021427	5	protein-coding	58	26	4	88	91	71	0.422583	47	201	201	0.119767	0.119767
565	1431826_a_at	75770	Brsk2	BR serine/threonine kinase 2	4	3.05165	9024	BRSK2	MGI:1923020|Ensembl:ENSMUSG00000053046|Vega:OTTMUSG00000036942	7	protein-coding	7	18	2	27	33	17	0.418814	43	343	343	0.119141	0.119141
566	1457311_at	12322	Camk2a	calcium/calmodulin-dependent protein kinase II alpha	2	4.56025	815	CAMK2A	MGI:88256|Ensembl:ENSMUSG00000024617|Vega:OTTMUSG00000016302	18	protein-coding	223	126	129	478	2170	1328	0.625858	428	38	38	0.119006	0.119006
567	ILMN_2642444	272381	Lrrc4b	leucine rich repeat containing 4B	3	3.52351	94030	LRRC4B	MGI:3027390|Ensembl:ENSMUSG00000047085|Vega:OTTMUSG00000027279	7	protein-coding	3	1	2	6	5	5	0.417967	41	456	456	0.116936	0.116936
568	1450930_at	15444	Hpca	hippocalcin	0	5.50807	3208	HPCA	MGI:1336200|Ensembl:ENSMUSG00000028785|Vega:OTTMUSG00000009624	4	protein-coding	11	15	12	38	2876	1371	0.755938	588	36	36	0.115992	0.115992
569	1457587_at	226922	Kcnq5	potassium voltage-gated channel, subfamily Q, member 5	5	3.06431	56479	KCNQ5	MGI:1924937|Ensembl:ENSMUSG00000028033|Vega:OTTMUSG00000019675	1	protein-coding	7	15	12	34	121	71	0.420553	44	201	201	0.113375	0.113375
570	1420537_at	67516	Kctd4	potassium channel tetramerisation domain containing 4	5	3.02772	386618	KCTD4	MGI:1914766|Ensembl:ENSMUSG00000046523	14	protein-coding	0	0	0	0	0	0	0.41553	39	582	581	0.113372	0.113372
571	1416967_at	20674	Sox2	SRY-box containing gene 2	5	3.26098	6657	SOX2	MGI:98364|Ensembl:ENSMUSG00000074637|Vega:OTTMUSG00000021249	3	protein-coding	479	186	9	674	1976	676	0.447544	87	57	57	0.113297	0.113297
572	ILMN_2827729	12308	Calb2	calbindin 2	2	6.44033	794	CALB2	MGI:101914|Ensembl:ENSMUSG00000003657	8	protein-coding	378	50	21	449	1943	1446	0.763967	596	35	35	0.113065	0.113065
573	1438399_at	58869	Pex5l	peroxisomal biogenesis factor 5-like	5	3.04019	51555	PEX5L	MGI:1916672|Ensembl:ENSMUSG00000027674|Vega:OTTMUSG00000023437	3	protein-coding	11	6	8	25	81	32	0.417241	40	272	272	0.108926	0.108926
574	ILMN_1259536	17441	Mog	myelin oligodendrocyte glycoprotein	0	4.37663	4340	MOG	MGI:97435|Ensembl:ENSMUSG00000076439|Vega:OTTMUSG00000014932	17	protein-coding	54	50	20	124	1452	1355	0.519166	236	37	37	0.108385	0.108385
575	ILMN_2479273	227632	Kcnt1	potassium channel, subfamily T, member 1	5	3.50235	57582	KCNT1	MGI:1924627|Ensembl:ENSMUSG00000058740|Vega:OTTMUSG00000012660	2	protein-coding	4	3	7	14	16	11	0.415457	38	388	388	0.107664	0.107664
576	1436148_at	21960	Tnr	tenascin R	3	3.07809	7143	TNR	MGI:99516|Ensembl:ENSMUSG00000015829	1	protein-coding	41	21	16	78	186	158	0.422443	45	136	136	0.106985	0.106985
577	1422809_at	116838	Rims2	regulating synaptic membrane exocytosis 2	5	3.35307	9699	RIMS2	MGI:2152972|Ensembl:ENSMUSG00000037386	15	protein-coding	18	11	7	36	5961	1068	0.460182	112	45	45	0.106919	0.106919
578	1455272_at	108071	Grm5	glutamate receptor, metabotropic 5	1	5.14754	2915	GRM5	MGI:1351342|Ensembl:ENSMUSG00000049583|Vega:OTTMUSG00000016489	7	protein-coding	109	45	139	293	1510	1467	0.706459	535	33	33	0.106275	0.106275
579	ILMN_2780022	75769	4833424O15Rik	RIKEN cDNA 4833424O15 gene	2	3.49922	163404	LPPR5	MGI:1923019|Ensembl:ENSMUSG00000033342|Vega:OTTMUSG00000026606	3	protein-coding	1	2	1	4	50	9	0.415086	37	409	409	0.105479	0.105479
580	ILMN_1218712	319984	Jph4	junctophilin 4	3	3.48797	84502	JPH4	MGI:2443113|Ensembl:ENSMUSG00000022208|Vega:OTTMUSG00000027953	14	protein-coding	6	2	1	9	13	1	0.413751	36	543	543	0.104724	0.104724
581	1434146_at	14800	Gria2	glutamate receptor, ionotropic, AMPA2 (alpha 2)	0	6.31536	2891	GRIA2	MGI:95809|Ensembl:ENSMUSG00000033981	3	protein-coding	164	75	139	378	1823	1669	0.866733	636	31	31	0.101202	0.101202
582	ILMN_2732079	239650	AI836003	expressed sequence AI836003	3	3.47452	387856	C12orf68	MGI:2146066|Ensembl:ENSMUSG00000029875	15	protein-coding	0	0	0	0	0	0	0.412156	34	582	581	0.0995608	0.0995608
583	1434638_at	14811	Grin2a	glutamate receptor, ionotropic, NMDA2A (epsilon 1)	1	3.88632	2903	GRIN2A	MGI:95820|Ensembl:ENSMUSG00000059003|Vega:OTTMUSG00000016264	16	protein-coding	184	140	167	491	1768	1584	0.533367	266	32	32	0.0971058	0.0971058
584	1451718_at	18823	Plp1	proteolipid protein (myelin) 1	0	6.18784	5354	PLP1	MGI:97623|Ensembl:ENSMUSG00000031425|Vega:OTTMUSG00000016519	X	protein-coding	327	106	19	452	3018	1794	0.849232	631	29	29	0.0949532	0.0949532
585	1457156_at	237553	Trhde	TRH-degrading enzyme	5	3.00496	29953	TRHDE	MGI:2384311|Ensembl:ENSMUSG00000050663|Vega:OTTMUSG00000025680	10	protein-coding	1	5	8	14	121	65	0.412407	35	210	210	0.0938547	0.0938547
586	1435513_at	15560	Htr2c	5-hydroxytryptamine (serotonin) receptor 2C	0	4.03195	3358	HTR2C	MGI:96281|Ensembl:ENSMUSG00000041380|Vega:OTTMUSG00000018943	X	protein-coding	92	191	75	358	2484	1788	0.553353	301	30	30	0.0929247	0.0929247
587	ILMN_2618244	72961	Slc17a7	solute carrier family 17 (sodium-dependent inorganic phosphate cotransporter), member 7	3	3.58174	57030	SLC17A7	MGI:1920211|Ensembl:ENSMUSG00000070570	7	protein-coding	80	15	58	153	497	487	0.424875	50	68	68	0.092919	0.092919
588	ILMN_1220815	53420	Syt5	synaptotagmin V	5	3.46015	6861	SYT5	MGI:1926368|Ensembl:ENSMUSG00000004961	7	protein-coding	13	9	8	30	30	18	0.410451	32	337	337	0.0908873	0.0908873
589	ILMN_1225261	22223	Uchl1	ubiquitin carboxy-terminal hydrolase L1	5	4.8106	7345	UCHL1	MGI:103149|Ensembl:ENSMUSG00000029223	5	protein-coding	200	150	20	370	2560	1819	0.570645	335	28	28	0.088155	0.088155
590	ILMN_2707941	14608	Gpr83	G protein-coupled receptor 83	4	3.45345	10888	GPR83	MGI:95712|Ensembl:ENSMUSG00000031932|Vega:OTTMUSG00000027389	9	protein-coding	11	5	2	18	92	20	0.409657	31	324	324	0.0879945	0.0879945
591	1428866_at	72125	Fam123a	family with sequence similarity 123, member A	5	2.98176	219287	FAM123A	MGI:1919375|Ensembl:ENSMUSG00000021986	14	protein-coding	2	4	1	7	5	2	0.409223	30	520	520	0.0879096	0.0879096
592	ILMN_1241838	12291	Cacna1g	calcium channel, voltage-dependent, T type, alpha 1G subunit	5	3.46368	8913	CACNA1G	MGI:1201678|Ensembl:ENSMUSG00000020866|Vega:OTTMUSG00000001890	11	protein-coding	47	27	27	101	292	110	0.41087	33	156	156	0.0855029	0.0855029
593	ILMN_2856946	211383	Fam123c	family with sequence similarity 123, member C	2	3.4177	205147	FAM123C	MGI:3026939|Ensembl:ENSMUSG00000045174	1	protein-coding	1	1	0	2	3	1	0.405416	29	543	543	0.0852904	0.0852904
594	1423515_at	20273	Scn8a	sodium channel, voltage-gated, type VIII, alpha	2	5.25817	6334	SCN8A	MGI:103169|Ensembl:ENSMUSG00000023033	15	protein-coding	115	29	17	161	3690	1935	0.721642	553	26	26	0.0850349	0.0850349
595	1448972_at	14799	Gria1	glutamate receptor, ionotropic, AMPA1 (alpha 1)	0	5.42668	2890	GRIA1	MGI:95808|Ensembl:ENSMUSG00000020524|Vega:OTTMUSG00000005703	11	protein-coding	206	85	173	464	2069	1940	0.744769	576	25	25	0.0820791	0.0820791
596	ILMN_1235388	230868	Igsf21	immunoglobin superfamily, member 21	5	3.39541	84966	IGSF21	MGI:2681842|Ensembl:ENSMUSG00000040972|Vega:OTTMUSG00000010057	4	protein-coding	1	2	0	3	0	0	0.402771	26	582	581	0.077037	0.077037
597	1418271_at	59058	Bhlhe22	basic helix-loop-helix family, member e22	5	3.10049	27319	BHLHE22	MGI:1930001|Ensembl:ENSMUSG00000025128|Vega:OTTMUSG00000018225	3	protein-coding	31	4	0	35	5333	1113	0.425517	51	42	42	0.0753045	0.0753045
598	1442370_at	14812	Grin2b	glutamate receptor, ionotropic, NMDA2B (epsilon 2)	0	4.45863	2904	GRIN2B	MGI:95821|Ensembl:ENSMUSG00000030209|Vega:OTTMUSG00000016356	6	protein-coding	216	203	221	640	2435	2180	0.611912	406	23	23	0.0744619	0.0744619
599	ILMN_2708717	76898	B3gat1	beta-1,3-glucuronyltransferase 1 (glucuronosyltransferase P)	1	6.0486	27087	B3GAT1	MGI:1924148|Ensembl:ENSMUSG00000045994|Vega:OTTMUSG00000028627	9	protein-coding	23	32	7	62	5470	2232	0.717499	544	22	22	0.0724582	0.0724582
600	ILMN_2989312	228858	Gdap1l1	ganglioside-induced differentiation-associated protein 1-like 1	3	3.37562	78997	GDAP1L1	MGI:2385163|Ensembl:ENSMUSG00000017943|Vega:OTTMUSG00000001073	2	protein-coding	0	1	0	1	2	0	0.400424	24	582	581	0.0713224	0.0713224
601	ILMN_1252806	268934	Grm4	glutamate receptor, metabotropic 4	5	3.41362	2914	GRM4	MGI:1351341|Ensembl:ENSMUSG00000063239|Vega:OTTMUSG00000028925	17	protein-coding	23	25	20	68	320	314	0.404932	28	94	94	0.0681212	0.0681212
602	1441491_at	18213	Ntrk3	neurotrophic tyrosine kinase, receptor, type 3	1	4.05381	4916	NTRK3	MGI:97385|Ensembl:ENSMUSG00000059146|Vega:OTTMUSG00000021139	7	protein-coding	172	88	42	302	2489	2315	0.556353	304	21	21	0.0671106	0.0671106
603	1417504_at	12307	Calb1	calbindin 1	4	5.17109	793	CALB1	MGI:88248|Ensembl:ENSMUSG00000028222|Vega:OTTMUSG00000004637	4	protein-coding	641	34	39	714	2968	2364	0.70969	538	20	20	0.0661019	0.0661019
604	ILMN_2869082	236576	Spry3	sprouty homolog 3 (Drosophila)	3	3.33636	10251	SPRY3	MGI:1345188	X	protein-coding	6	8	0	14	12	3	0.395767	22	498	498	0.0652174	0.0652174
605	ILMN_2698299	14403	Gabrd	gamma-aminobutyric acid (GABA) A receptor, subunit delta	1	3.33991	2563	GABRD	MGI:95622|Ensembl:ENSMUSG00000029054|Vega:OTTMUSG00000010612	4	protein-coding	45	10	22	77	54	54	0.396188	23	225	225	0.0649359	0.0649359
606	1458622_at	18212	Ntrk2	neurotrophic tyrosine kinase, receptor, type 2	0	5.54259	4915	NTRK2	MGI:97384|Ensembl:ENSMUSG00000055254	13	protein-coding	344	186	150	680	2625	2537	0.760677	591	19	19	0.0631371	0.0631371
607	ILMN_1248672	240332	Slc6a7	solute carrier family 6 (neurotransmitter transporter, L-proline), member 7	5	3.32511	6534	SLC6A7	MGI:2147363|Ensembl:ENSMUSG00000052026	18	protein-coding	3	3	2	8	29	16	0.394432	21	346	346	0.0613799	0.0613799
608	ILMN_2928546	333605	Frmpd4	FERM and PDZ domain containing 4	3	3.31533	9758	FRMPD4	MGI:3042378|Ensembl:ENSMUSG00000049176|Vega:OTTMUSG00000019574	X	protein-coding	3	1	0	4	12	4	0.393272	20	477	477	0.0594035	0.0594035
609	ILMN_1256814	16531	Kcnma1	potassium large conductance calcium-activated channel, subfamily M, alpha member 1	5	3.38031	3778	KCNMA1	MGI:99923|Ensembl:ENSMUSG00000063142	14	protein-coding	113	126	61	300	1201	452	0.40098	25	73	73	0.0589642	0.0589642
610	ILMN_2783873	18610	Pdyn	prodynorphin	3	3.66166	5173	PDYN	MGI:97535	2	protein-coding	59	58	26	143	4080	2057	0.434354	61	24	24	0.0573926	0.0573926
611	1426340_at	20512	Slc1a3	solute carrier family 1 (glial high affinity glutamate transporter), member 3	4	3.77784	6507	SLC1A3	MGI:99917|Ensembl:ENSMUSG00000005360|Vega:OTTMUSG00000032639	15	protein-coding	171	56	45	272	3857	2747	0.518479	233	18	18	0.0570399	0.0570399
612	ILMN_1235647	20666	Sox11	SRY-box containing gene 11	5	3.30552	6664	SOX11	MGI:98359|Ensembl:ENSMUSG00000063632|Vega:OTTMUSG00000021163	12	protein-coding	53	31	7	91	120	61	0.392108	19	217	217	0.0542957	0.0542957
613	1434342_at	20203	S100b	S100 protein, beta polypeptide, neural	3	3.77772	6285	S100B	MGI:98217|Ensembl:ENSMUSG00000033208|Vega:OTTMUSG00000020277	10	protein-coding	164	223	106	493	5831	3019	0.518462	232	17	17	0.0540922	0.0540922
614	1434172_at	12801	Cnr1	cannabinoid receptor 1 (brain)	2	5.07173	1268	CNR1	MGI:104615|Ensembl:ENSMUSG00000044288|Vega:OTTMUSG00000008304	4	protein-coding	347	272	200	819	4093	3104	0.696054	524	16	16	0.0532608	0.0532608
615	ILMN_2911729	56461	Kcnip3	Kv channel interacting protein 3, calsenilin	5	3.29816	30818	KCNIP3	MGI:1929258|Ensembl:ENSMUSG00000079056|Vega:OTTMUSG00000016030	2	protein-coding	36	43	21	100	106	82	0.391235	18	192	192	0.051175	0.051175
616	ILMN_1213337	72693	Zcchc12	zinc finger, CCHC domain containing 12	3	3.26035	170261	ZCCHC12	MGI:1919943|Ensembl:ENSMUSG00000036699|Vega:OTTMUSG00000017218	X	protein-coding	5	5	0	10	5	4	0.386751	17	477	477	0.0507685	0.0507685
617	ILMN_3130719	319613	Sybu	syntabulin (syntaxin-interacting)	3	4.35474	55638	SYBU	MGI:2442392|Ensembl:ENSMUSG00000022340	15	protein-coding	4	6	2	12	4098	3255	0.516569	228	15	15	0.0481003	0.0481003
618	ILMN_2722864	17967	Ncam1	neural cell adhesion molecule 1	2	4.76163	4684	NCAM1	MGI:97281|Ensembl:ENSMUSG00000039542	9	protein-coding	419	181	86	686	8392	3446	0.564836	320	14	14	0.0459473	0.0459473
619	ILMN_2613068	53870	Cntn6	contactin 6	3	3.23613	27255	CNTN6	MGI:1858223|Ensembl:ENSMUSG00000030092|Vega:OTTMUSG00000033392	6	protein-coding	11	6	3	20	104	96	0.383877	16	172	172	0.0455162	0.0455162
620	ILMN_3062075	109593	Lmo3	LIM domain only 3	1	3.20249	55885	LMO3	MGI:102810|Ensembl:ENSMUSG00000030226|Vega:OTTMUSG00000034595	6	protein-coding	23	6	0	29	24	15	0.379887	15	350	350	0.044517	0.044517
621	ILMN_2814927	12652	Chga	chromogranin A	4	3.39741	1113	CHGA	MGI:88394|Ensembl:ENSMUSG00000021194	12	protein-coding	95	150	31	276	4088	1826	0.403008	27	27	27	0.0439024	0.0439024
622	1418493_a_at	20617	Snca	synuclein, alpha	5	4.27598	6622	SNCA	MGI:1277151|Ensembl:ENSMUSG00000025889	6	protein-coding	235	886	129	1250	4338	3938	0.586843	363	13	13	0.0430291	0.0430291
623	ILMN_2626345	18196	Nsg1	neuron specific gene family member 1	4	3.20236	27065	D4S234E	MGI:109149|Ensembl:ENSMUSG00000029126	5	protein-coding	9	5	8	22	51	19	0.379871	14	330	330	0.0415647	0.0415647
624	1419473_a_at	12424	Cck	cholecystokinin	1	5.6511	885	CCK	MGI:88297|Ensembl:ENSMUSG00000032532	9	protein-coding	121	88	56	265	9996	4899	0.775568	604	12	12	0.0404112	0.0404112
625	ILMN_2630182	20977	Syp	synaptophysin	1	6.7782	6855	SYP	MGI:98467|Ensembl:ENSMUSG00000031144|Vega:OTTMUSG00000017756	X	protein-coding	230	55	43	328	6353	5041	0.804045	619	11	11	0.0371287	0.0371287
626	ILMN_1226295	242506	Frmd3	FERM domain containing 3	3	3.18338	257019	FRMD3	MGI:2442466|Ensembl:ENSMUSG00000049122|Vega:OTTMUSG00000000793	4	protein-coding	0	5	0	5	10	2	0.377619	12	520	520	0.0362315	0.0362315
627	ILMN_2763002	13807	Eno2	enolase 2, gamma neuronal	1	6.69658	2026	ENO2	MGI:95394|Ensembl:ENSMUSG00000004267|Vega:OTTMUSG00000022240	6	protein-coding	42	69	43	154	6193	5567	0.794363	614	10	10	0.0338083	0.0338083
628	ILMN_2949444	242384	Lingo2	leucine rich repeat and Ig domain containing 2	1	3.17677	158038	LINGO2	MGI:2442298|Ensembl:ENSMUSG00000045083|Vega:OTTMUSG00000006502	4	protein-coding	2	6	0	8	9	5	0.376836	11	456	456	0.0331817	0.0331817
629	ILMN_1228206	13193	Dcx	doublecortin	2	3.20146	1641	DCX	MGI:1277171|Ensembl:ENSMUSG00000031285|Vega:OTTMUSG00000018842	X	protein-coding	172	58	24	254	1181	1109	0.379765	13	43	43	0.0315285	0.0315285
630	1434194_at	17756	Mtap2	microtubule-associated protein 2	3	5.28395	6622	SNCA	MGI:97175|Ensembl:ENSMUSG00000015222|Vega:OTTMUSG00000016448	1	protein-coding	285	886	0	1171	6501	5949	0.72518	557	9	9	0.0304318	0.0304318
631	ILMN_1242557	26946	Trpc7	transient receptor potential cation channel, subfamily C, member 7	4	3.14505	57113	TRPC7	MGI:1349470|Ensembl:ENSMUSG00000021541|Vega:OTTMUSG00000024552	13	protein-coding	10	14	3	27	485	273	0.373073	10	104	104	0.0283742	0.0283742
632	1428664_at	22353	Vip	vasoactive intestinal polypeptide	2	3.70645	7432	VIP	MGI:98933|Ensembl:ENSMUSG00000019772	10	protein-coding	122	91	89	302	9995	5990	0.50868	205	8	8	0.0263884	0.0263884
633	ILMN_2666080	73940	Hapln2	hyaluronan and proteoglycan link protein 2	4	3.13806	60484	HAPLN2	MGI:2137300|Ensembl:ENSMUSG00000004894|Vega:OTTMUSG00000027207	3	protein-coding	6	7	2	15	10	9	0.372244	8	409	409	0.0242291	0.0242291
634	1421446_at	18752	Prkcc	protein kinase C, gamma	1	3.34607	5582	PRKCG	MGI:97597|Ensembl:ENSMUSG00000078816	7	protein-coding	133	141	59	333	9995	6090	0.459221	107	7	7	0.0224554	0.0224554
635	ILMN_2807572	18389	Oprl1	opioid receptor-like 1	3	3.14334	4987	OPRL1	MGI:97440|Ensembl:ENSMUSG00000027584|Vega:OTTMUSG00000016806	2	protein-coding	59	40	41	140	3493	1454	0.37287	9	34	34	0.0224217	0.0224217
636	ILMN_1215713	13656	Egr4	early growth response 4	5	3.10612	1961	EGR4	MGI:99252|Ensembl:ENSMUSG00000071341	6	protein-coding	15	8	2	25	70	43	0.368455	7	244	244	0.0210315	0.0210315
637	1433532_a_at	17196	Mbp	myelin basic protein	0	6.95978	4155	MBP	MGI:96925|Ensembl:ENSMUSG00000041607|Vega:OTTMUSG00000016316	18	protein-coding	401	144	0	545	9508	7095	0.955174	647	6	6	0.0204423	0.0204423
638	ILMN_1239565	19281	Ptprt	protein tyrosine phosphatase, receptor type, T	5	3.10534	11122	PTPRT	MGI:1321152|Ensembl:ENSMUSG00000053141|Vega:OTTMUSG00000015291	2	protein-coding	8	16	0	24	263	115	0.368363	6	149	149	0.0178466	0.0178466
639	1457984_at	12918	Crh	corticotropin releasing hormone	0	4.15432	1392	CRH	MGI:88496|Ensembl:ENSMUSG00000049796	3	protein-coding	151	130	196	477	9974	8020	0.570147	331	5	5	0.0169261	0.0169261
640	ILMN_2559272	210801	Unc5d	unc-5 homolog D (C. elegans)	4	3.09544	137970	UNC5D	MGI:2389364|Ensembl:ENSMUSG00000063626	8	protein-coding	13	3	0	16	18	13	0.367188	5	368	368	0.0152232	0.0152232
641	ILMN_2729826	20604	Sst	somatostatin	2	5.49692	6750	SST	MGI:98326|Ensembl:ENSMUSG00000004366	16	protein-coding	323	70	63	456	9995	9453	0.652057	470	4	4	0.0136397	0.0136397
642	ILMN_2463583	238384	Slc24a4	solute carrier family 24 (sodium/potassium/calcium exchanger), member 4	5	3.0728	123041	SLC24A4	MGI:2447362|Ensembl:ENSMUSG00000041771|Vega:OTTMUSG00000033883	12	protein-coding	3	8	3	14	30	12	0.364503	4	378	378	0.012211	0.012211
643	1455799_at	225998	Rorb	RAR-related orphan receptor beta	5	3.13966	6096	RORB	MGI:1343464|Ensembl:ENSMUSG00000036192|Vega:OTTMUSG00000023329	19	protein-coding	62	15	11	88	9985	9981	0.430894	56	3	3	0.00974393	0.00974393
644	ILMN_2798973	17932	Myt1	myelin transcription factor 1	5	3.04731	4661	MYT1	MGI:1100535|Ensembl:ENSMUSG00000010505|Vega:OTTMUSG00000016812	2	protein-coding	18	13	0	31	114	38	0.361479	3	257	257	0.00914938	0.00914938
645	ILMN_2774528	69519	Rwdd2a	RWD domain containing 2A	4	3.04186	112611	RWDD2A	MGI:1916769|Ensembl:ENSMUSG00000032417	9	protein-coding	0	0	0	0	0	0	0.360832	2	582	581	0.00614439	0.00614439
646	ILMN_1215847	14580	Gfap	glial fibrillary acidic protein	1	4.13692	2670	GFAP	MGI:95697|Ensembl:ENSMUSG00000020932|Vega:OTTMUSG00000003084	11	protein-coding	636	143	80	859	9993	9996	0.490732	170	1	1	0.00341987	0.00341987
647	1416783_at	21333	Tac1	tachykinin 1	5	3.23663	6863	TAC1	MGI:98474|Ensembl:ENSMUSG00000061762	6	protein-coding	174	131	125	430	9997	9996	0.444202	83	1	1	0.00339663	0.00339663
648	ILMN_1243701	14805	Grik1	glutamate receptor, ionotropic, kainate 1	3	3.02484	2897	GRIK1	MGI:95814|Ensembl:ENSMUSG00000022935	16	protein-coding	68	40	27	135	728	693	0.358814	1	56	56	0.00303318	0.00303318
